# Supplementary material for: Lewis adduct formation of hydrogen cyanide and nitriles with arsenic and antimony pentafluoride
Source: Royal Society of Chemistry journal article supplement (doi:10.1039/c8dt03970d), 2018-11-14
Supplement: c8dt03970d1.pdf [file c8dt03970d1.pdf]

***Supporting Information***

*for*

**Lewis Adduct Formation of Hydrogen Cyanide and Nitriles with Arsenic  
and Antimony Pentafluoride**

Thomas Saal, Karl O. Christe and Ralf Haiges\*

\*E-mail: [haiges@usc.edu](mailto:haiges@usc.edu)

Loker Hydrocarbon Research Institute and Department of Chemistry,  
University of Southern California Los Angeles, CA 90089-1661 (USA)

|                                                                                                                                                                                              |           |
|----------------------------------------------------------------------------------------------------------------------------------------------------------------------------------------------|-----------|
| <b>Experimental Details .....</b>                                                                                                                                                            | <b>6</b>  |
| <b>General .....</b>                                                                                                                                                                         | <b>6</b>  |
| Materials and Apparatus.....                                                                                                                                                                 | 6         |
| Crystal Structure Determination.....                                                                                                                                                         | 6         |
| Preparation of $\text{RCN}\cdot\text{AsF}_5$ (R = H, $\text{CH}_2\text{CN}$ , $\text{C}_3\text{H}_7$ , $\text{C-C}_3\text{H}_5$ , $\text{C}(\text{CH}_3)_3$ , $\text{C}_6\text{H}_5$ ) ..... | 6         |
| Preparation of $\text{RCN}\cdot\text{SbF}_5$ (R = H, $\text{CH}_2\text{CN}$ , $\text{C}_3\text{H}_7$ , $\text{C-C}_3\text{H}_5$ , $\text{C}(\text{CH}_3)_3$ , $\text{C}_6\text{H}_5$ ) ..... | 7         |
| Preparation of $\text{AsF}_5\cdot\text{NCCH}_2\text{CN}\cdot\text{AsF}_5$ .....                                                                                                              | 8         |
| Preparation of $\text{SbF}_5\cdot\text{NCCH}_2\text{CN}\cdot\text{SbF}_5$ .....                                                                                                              | 9         |
| <b>NMR Spectra .....</b>                                                                                                                                                                     | <b>10</b> |
| HCN .....                                                                                                                                                                                    | 10        |
| $\text{HCN}\cdot\text{AsF}_5$ .....                                                                                                                                                          | 12        |
| $\text{HCN}\cdot\text{SbF}_5$ .....                                                                                                                                                          | 14        |
| $\text{NCCH}_2\text{CN}$ .....                                                                                                                                                               | 16        |
| $\text{NCCH}_2\text{CN}\cdot\text{AsF}_5$ .....                                                                                                                                              | 18        |
| $\text{NCCH}_2\text{CN}\cdot\text{SbF}_5$ .....                                                                                                                                              | 21        |
| $\text{AsF}_5\cdot\text{NCCH}_2\text{CN}\cdot\text{AsF}_5$ .....                                                                                                                             | 23        |
| $\text{SbF}_5\cdot\text{NCCH}_2\text{CN}\cdot\text{SbF}_5$ .....                                                                                                                             | 25        |
| $\text{C}_3\text{H}_7\text{CN}$ .....                                                                                                                                                        | 27        |
| $\text{C}_3\text{H}_7\text{CN}\cdot\text{AsF}_5$ .....                                                                                                                                       | 29        |
| $\text{C}_3\text{H}_7\text{CN}\cdot\text{SbF}_5$ .....                                                                                                                                       | 32        |
| cyclo- $\text{C}_3\text{H}_5\text{CN}$ .....                                                                                                                                                 | 34        |
| cyclo- $\text{C}_3\text{H}_5\text{CN}\cdot\text{AsF}_5$ .....                                                                                                                                | 36        |
| cyclo- $\text{C}_3\text{H}_5\text{CN}\cdot\text{SbF}_5$ .....                                                                                                                                | 38        |
| $(\text{CH}_3)_3\text{CCN}$ .....                                                                                                                                                            | 40        |
| $(\text{CH}_3)_3\text{CCN}\cdot\text{AsF}_5$ .....                                                                                                                                           | 42        |
| $(\text{CH}_3)_3\text{CCN}\cdot\text{SbF}_5$ .....                                                                                                                                           | 44        |
| $\text{C}_6\text{H}_5\text{CN}$ .....                                                                                                                                                        | 46        |
| $\text{C}_6\text{H}_5\text{CN}\cdot\text{AsF}_5$ .....                                                                                                                                       | 48        |
| $\text{C}_6\text{H}_5\text{CN}\cdot\text{SbF}_5$ .....                                                                                                                                       | 51        |
| Table S1-0. Comparison of NMR chemical shifts for the Lewis adducts and the free nitriles. ....                                                                                              | 53        |
| <b>Raman Spectra .....</b>                                                                                                                                                                   | <b>54</b> |
| HCN .....                                                                                                                                                                                    | 54        |
| $\text{HCN}\cdot\text{AsF}_5$ .....                                                                                                                                                          | 55        |
| $\text{HCN}\cdot\text{SbF}_5$ .....                                                                                                                                                          | 56        |
| $\text{NCCH}_2\text{CN}$ .....                                                                                                                                                               | 57        |
| $\text{NCCH}_2\text{CN}\cdot\text{AsF}_5$ .....                                                                                                                                              | 58        |
| $\text{NCCH}_2\text{CN}\cdot\text{SbF}_5$ .....                                                                                                                                              | 59        |
| $\text{AsF}_5\cdot\text{NCCH}_2\text{CN}\cdot\text{AsF}_5$ .....                                                                                                                             | 60        |
| $\text{SbF}_5\cdot\text{NCCH}_2\text{CN}\cdot\text{SbF}_5$ .....                                                                                                                             | 61        |
| $\text{C}_3\text{H}_7\text{CN}$ .....                                                                                                                                                        | 62        |
| $\text{C}_3\text{H}_7\text{CN}\cdot\text{AsF}_5$ .....                                                                                                                                       | 63        |
| $\text{C}_3\text{H}_7\text{CN}\cdot\text{SbF}_5$ .....                                                                                                                                       | 64        |
| cyclo- $\text{C}_3\text{H}_5\text{CN}$ .....                                                                                                                                                 | 65        |
| cyclo- $\text{C}_3\text{H}_5\text{CN}\cdot\text{AsF}_5$ .....                                                                                                                                | 66        |
| cyclo- $\text{C}_3\text{H}_5\text{CN}\cdot\text{SbF}_5$ .....                                                                                                                                | 67        |
| $(\text{CH}_3)_3\text{CCN}$ .....                                                                                                                                                            | 68        |
| $(\text{CH}_3)_3\text{CCN}\cdot\text{AsF}_5$ .....                                                                                                                                           | 69        |
| $(\text{CH}_3)_3\text{CCN}\cdot\text{SbF}_5$ .....                                                                                                                                           | 70        |
| $\text{C}_6\text{H}_5\text{CN}$ .....                                                                                                                                                        | 71        |
| $\text{C}_6\text{H}_5\text{CN}\cdot\text{AsF}_5$ .....                                                                                                                                       | 72        |
| $\text{C}_6\text{H}_5\text{CN}\cdot\text{SbF}_5$ .....                                                                                                                                       | 73        |
| FEP .....                                                                                                                                                                                    | 74        |
| Table S2-0. Comparison of CN stretching vibration frequencies of the Lewis adducts and the free nitriles. ....                                                                               | 74        |
| <b>Crystallographic Details.....</b>                                                                                                                                                         | <b>75</b> |

|                                                                                                                                                                      |           |
|----------------------------------------------------------------------------------------------------------------------------------------------------------------------|-----------|
| <b>HCN•AsF<sub>5</sub></b> .....                                                                                                                                     | <b>75</b> |
| Figure S1-1. Molecular unit of HCN•AsF <sub>5</sub> . View along the 010 direction. ....                                                                             | 75        |
| Figure S2-1. Packing of HCN•AsF <sub>5</sub> . View along the 010 direction. ....                                                                                    | 75        |
| Table S1-1. Sample and crystal data for HCN•AsF <sub>5</sub> .....                                                                                                   | 75        |
| Table S2-1. Data collection and structure refinement for HCN•AsF <sub>5</sub> .....                                                                                  | 76        |
| Table S3-1. Atomic coordinates and equivalent isotropic atomic displacement parameters (Å <sup>2</sup> ) for HCN•AsF <sub>5</sub> .....                              | 76        |
| Table S4-1. Bond lengths (Å) for HCN•AsF <sub>5</sub> .....                                                                                                          | 76        |
| Table S5-1. Bond angles (°) for HCN•AsF <sub>5</sub> .....                                                                                                           | 77        |
| Table S6-1. Anisotropic atomic displacement parameters (Å <sup>2</sup> ) for HCN•AsF <sub>5</sub> .....                                                              | 77        |
| Table S7-1. Hydrogen atomic coordinates and isotropic atomic displacement parameters (Å <sup>2</sup> ) for HCN•AsF <sub>5</sub> .....                                | 77        |
| <b>HCN•SbF<sub>5</sub></b> .....                                                                                                                                     | <b>77</b> |
| Figure S1-3. Asymmetric unit of HCN•SbF <sub>5</sub> .....                                                                                                           | 78        |
| Figure S2-3. Hydrogen bonding in HCN•SbF <sub>5</sub> . View along the 001 direction. ....                                                                           | 78        |
| Figure S3-3. Packing of HCN•SbF <sub>5</sub> in the unit cell. View along the 010 direction. ....                                                                    | 78        |
| Table S1-3. Sample and crystal data for HCN•SbF <sub>5</sub> .....                                                                                                   | 79        |
| Table S2-3. Data collection and structure refinement for HCN•SbF <sub>5</sub> .....                                                                                  | 79        |
| Table S3-3. Atomic coordinates and equivalent isotropic atomic displacement parameters (Å <sup>2</sup> ) for HCN•SbF <sub>5</sub> .....                              | 80        |
| Table S4-3. Bond lengths (Å) for HCN•SbF <sub>5</sub> .....                                                                                                          | 80        |
| Table S5-3. Bond angles (°) for HCN•SbF <sub>5</sub> .....                                                                                                           | 80        |
| Table S6-3. Anisotropic atomic displacement parameters (Å <sup>2</sup> ) for HCN•SbF <sub>5</sub> .....                                                              | 80        |
| Table S7-3. Hydrogen atomic coordinates and isotropic atomic displacement parameters (Å <sup>2</sup> ) for HCN•SbF <sub>5</sub> .....                                | 81        |
| <b>NCCH<sub>2</sub>CN•AsF<sub>5</sub></b> .....                                                                                                                      | <b>82</b> |
| Figure S1-3. Asymmetric unit of NCCH <sub>2</sub> CN•AsF <sub>5</sub> . View along the 001 direction.....                                                            | 82        |
| Figure S2-3. Packing of NCCH <sub>2</sub> CN•AsF <sub>5</sub> . View along the 010 direction.....                                                                    | 82        |
| Table S1-3. Sample and crystal data for NCCH <sub>2</sub> CN•AsF <sub>5</sub> .....                                                                                  | 83        |
| Table S2-3. Data collection and structure refinement for NCCH <sub>2</sub> CN•AsF <sub>5</sub> .....                                                                 | 83        |
| Table S3-3. Atomic coordinates and equivalent isotropic atomic displacement parameters (Å <sup>2</sup> ) for NCCH <sub>2</sub> CN•AsF <sub>5</sub> .....             | 84        |
| Table S4-3. Bond lengths (Å) for NCCH <sub>2</sub> CN•AsF <sub>5</sub> .....                                                                                         | 84        |
| Table S5-3. Bond angles (°) for NCCH <sub>2</sub> CN•AsF <sub>5</sub> .....                                                                                          | 84        |
| Table S6-3. Anisotropic atomic displacement parameters (Å <sup>2</sup> ) for NCCH <sub>2</sub> CN•AsF <sub>5</sub> .....                                             | 85        |
| Table S7-3. Hydrogen atomic coordinates and isotropic atomic displacement parameters (Å <sup>2</sup> ) for NCCH <sub>2</sub> CN•AsF <sub>5</sub> .....               | 85        |
| <b>NCCH<sub>2</sub>CN •SbF<sub>5</sub></b> .....                                                                                                                     | <b>86</b> |
| Figure S1-4. Asymmetric unit of NCCH <sub>2</sub> CN•SbF <sub>5</sub> . View along the 001 direction.....                                                            | 86        |
| Figure S2-4. Packing of NCCH <sub>2</sub> CN•SbF <sub>5</sub> . View along the 010 direction.....                                                                    | 86        |
| Table S1-4. Sample and crystal data for NCCH <sub>2</sub> CN•SbF <sub>5</sub> .....                                                                                  | 87        |
| Table S2-4. Data collection and structure refinement for NCCH <sub>2</sub> CN•SbF <sub>5</sub> .....                                                                 | 87        |
| Table S3-4. Atomic coordinates and equivalent isotropic atomic displacement parameters (Å <sup>2</sup> ) for NCCH <sub>2</sub> CN•SbF <sub>5</sub> .....             | 88        |
| Table S4-4. Bond lengths (Å) for NCCH <sub>2</sub> CN•SbF <sub>5</sub> .....                                                                                         | 88        |
| Table S5-4. Bond angles (°) for NCCH <sub>2</sub> CN•SbF <sub>5</sub> .....                                                                                          | 88        |
| Table S6-4. Anisotropic atomic displacement parameters (Å <sup>2</sup> ) for NCCH <sub>2</sub> CN•SbF <sub>5</sub> .....                                             | 88        |
| Table S7-4. Hydrogen atomic coordinates and isotropic atomic displacement parameters (Å <sup>2</sup> ) for AN26.....                                                 | 89        |
| <b>C<sub>3</sub>H<sub>7</sub>CN•AsF<sub>5</sub></b> .....                                                                                                            | <b>90</b> |
| Figure S1-5. Molecular unit of C <sub>3</sub> H <sub>7</sub> CN•AsF <sub>5</sub> .....                                                                               | 90        |
| Figure S2-5. Packing of C <sub>3</sub> H <sub>7</sub> CN•AsF <sub>5</sub> in the unit cell. View along the 001 direction (mirror plane in cyan).....                 | 90        |
| Figure S3-5. Packing of C <sub>3</sub> H <sub>7</sub> CN•AsF <sub>5</sub> in the unit cell. View along the 010 direction (mirror plane in cyan).....                 | 90        |
| Table S1-5. Sample and crystal data for C <sub>3</sub> H <sub>7</sub> CN•AsF <sub>5</sub> .....                                                                      | 91        |
| Table S2-5. Data collection and structure refinement for C <sub>3</sub> H <sub>7</sub> CN•AsF <sub>5</sub> .....                                                     | 91        |
| Table S3-5. Atomic coordinates and equivalent isotropic atomic displacement parameters (Å <sup>2</sup> ) for C <sub>3</sub> H <sub>7</sub> CN•AsF <sub>5</sub> ..... | 92        |
| Table S4-5. Bond lengths (Å) for C <sub>3</sub> H <sub>7</sub> CN•AsF <sub>5</sub> .....                                                                             | 92        |
| Table S5-5. Bond angles (°) for C <sub>3</sub> H <sub>7</sub> CN•AsF <sub>5</sub> .....                                                                              | 92        |
| Table S6-5. Torsion angles (°) for C <sub>3</sub> H <sub>7</sub> CN•AsF <sub>5</sub> .....                                                                           | 93        |
| Table S7-5. Anisotropic atomic displacement parameters (Å <sup>2</sup> ) for C <sub>3</sub> H <sub>7</sub> CN•AsF <sub>5</sub> .....                                 | 93        |
| Table S8-5. Hydrogen atomic coordinates and isotropic atomic displacement parameters (Å <sup>2</sup> ) for C <sub>3</sub> H <sub>7</sub> CN•AsF <sub>5</sub> .....   | 93        |
| <b>C<sub>3</sub>H<sub>7</sub>CN •SbF<sub>5</sub></b> .....                                                                                                           | <b>94</b> |
| Figure S1-5. Molecular unit of C <sub>3</sub> H <sub>7</sub> CN•SbF <sub>5</sub> .....                                                                               | 94        |
| Figure S2-5. Packing of C <sub>3</sub> H <sub>7</sub> CN•SbF <sub>5</sub> in the unit cell. View along the 001 direction (mirror plane in cyan).....                 | 94        |

|                                                                                                                                                     |            |
|-----------------------------------------------------------------------------------------------------------------------------------------------------|------------|
| Table S1-6. Sample and crystal data for $C_3H_7CN \cdot SbF_5$ .....                                                                                | 94         |
| Table S2-6. Data collection and structure refinement for $C_3H_7CN \cdot SbF_5$ .....                                                               | 95         |
| Table S3-6. Atomic coordinates and equivalent isotropic atomic displacement parameters ( $\text{\AA}^2$ ) for $C_3H_7CN \cdot SbF_5$ .....          | 95         |
| Table S4-6. Bond lengths ( $\text{\AA}$ ) for $C_3H_7CN \cdot SbF_5$ .....                                                                          | 95         |
| Table S5-6. Bond angles ( $^\circ$ ) for $C_3H_7CN \cdot SbF_5$ .....                                                                               | 96         |
| Table S6-6. Torsion angles ( $^\circ$ ) for $C_3H_7CN \cdot SbF_5$ .....                                                                            | 96         |
| Table S7-6. Anisotropic atomic displacement parameters ( $\text{\AA}^2$ ) for $C_3H_7CN \cdot SbF_5$ .....                                          | 96         |
| Table S8-6. Hydrogen atomic coordinates and isotropic atomic displacement parameters ( $\text{\AA}^2$ ) for $C_3H_7CN \cdot SbF_5$ .....            | 97         |
| <b>cyclo-<math>C_3H_5CN \cdot AsF_5</math></b> .....                                                                                                | <b>98</b>  |
| Figure S1-7. Molecular unit of cyclo- $C_3H_5CN \cdot AsF_5$ (mirror plane in cyan).....                                                            | 98         |
| Figure S2-7. Packing of cyclo- $C_3H_5CN \cdot AsF_5$ in the unit cell. View along the 010 direction (mirror plane in cyan).....                    | 98         |
| Figure S3-7. Packing of cyclo- $C_3H_5CN \cdot AsF_5$ in the unit cell. View along the 100 direction.....                                           | 98         |
| Table S1-7. Sample and crystal data for cyclo- $C_3H_5CN \cdot AsF_5$ .....                                                                         | 99         |
| Table S2-7. Data collection and structure refinement for cyclo- $C_3H_5CN \cdot AsF_5$ .....                                                        | 99         |
| Table S3-7. Atomic coordinates and equivalent isotropic atomic displacement parameters ( $\text{\AA}^2$ ) for cyclo- $C_3H_5CN \cdot AsF_5$ .....   | 100        |
| Table S4-7. Bond lengths ( $\text{\AA}$ ) for cyclo- $C_3H_5CN \cdot AsF_5$ .....                                                                   | 100        |
| Table S5-7. Bond angles ( $^\circ$ ) for cyclo- $C_3H_5CN \cdot AsF_5$ .....                                                                        | 100        |
| Table S6-7. Torsion angles ( $^\circ$ ) for cyclo- $C_3H_5CN \cdot AsF_5$ .....                                                                     | 101        |
| Table S7-7. Anisotropic atomic displacement parameters ( $\text{\AA}^2$ ) for cyclo- $C_3H_5CN \cdot AsF_5$ .....                                   | 101        |
| Table S8-7. Hydrogen atomic coordinates and isotropic atomic displacement parameters ( $\text{\AA}^2$ ) for cyclo- $C_3H_5CN \cdot AsF_5$ .....     | 101        |
| <b><math>(CH_3)_3CCN \cdot AsF_5</math></b> .....                                                                                                   | <b>102</b> |
| Figure S1-8. Molecular unit of $(CH_3)_3CCN \cdot AsF_5$ .....                                                                                      | 102        |
| Figure S2-8. Packing of $(CH_3)_3CCN \cdot AsF_5$ in the unit cell. View along the 010 direction (mirror plane in cyan).....                        | 102        |
| Table S1-8. Sample and crystal data for $(CH_3)_3CCN \cdot AsF_5$ .....                                                                             | 102        |
| Table S2-8. Data collection and structure refinement for $(CH_3)_3CCN \cdot AsF_5$ .....                                                            | 103        |
| Table S3-8. Atomic coordinates and equivalent isotropic atomic displacement parameters ( $\text{\AA}^2$ ) for $(CH_3)_3CCN \cdot AsF_5$ .....       | 103        |
| Table S4-8. Bond lengths ( $\text{\AA}$ ) for $(CH_3)_3CCN \cdot AsF_5$ .....                                                                       | 103        |
| Table S5-8. Bond angles ( $^\circ$ ) for $(CH_3)_3CCN \cdot AsF_5$ .....                                                                            | 104        |
| Table S6-8. Anisotropic atomic displacement parameters ( $\text{\AA}^2$ ) for $(CH_3)_3CCN \cdot AsF_5$ .....                                       | 104        |
| Table S7-8. Hydrogen atomic coordinates and isotropic atomic displacement parameters ( $\text{\AA}^2$ ) for $(CH_3)_3CCN \cdot AsF_5$ .....         | 105        |
| <b><math>(CH_3)_3CCN \cdot SbF_5</math></b> .....                                                                                                   | <b>106</b> |
| Figure S1-9. Molecular unit of $(CH_3)_3CCN \cdot SbF_5$ .....                                                                                      | 106        |
| Figure S2-9. Packing of $(CH_3)_3CCN \cdot SbF_5$ in the unit cell. View along the 010 direction (mirror plane in cyan).....                        | 106        |
| Table S1-9. Sample and crystal data for $(CH_3)_3CCN \cdot SbF_5$ .....                                                                             | 106        |
| Table S2-9. Data collection and structure refinement for $(CH_3)_3CCN \cdot SbF_5$ .....                                                            | 107        |
| Table S3-9. Atomic coordinates and equivalent isotropic atomic displacement parameters ( $\text{\AA}^2$ ) for TS377.....                            | 107        |
| Table S4-9. Bond lengths ( $\text{\AA}$ ) for $(CH_3)_3CCN \cdot SbF_5$ .....                                                                       | 108        |
| Table S5-9. Bond angles ( $^\circ$ ) for $(CH_3)_3CCN \cdot SbF_5$ .....                                                                            | 108        |
| Table S6-9. Anisotropic atomic displacement parameters ( $\text{\AA}^2$ ) for $(CH_3)_3CCN \cdot SbF_5$ .....                                       | 108        |
| Table S7-9. Hydrogen atomic coordinates and isotropic atomic displacement parameters ( $\text{\AA}^2$ ) for $(CH_3)_3CCN \cdot SbF_5$ .....         | 109        |
| <b><math>AsF_5 \cdot NCCH_2CN \cdot AsF_5</math></b> .....                                                                                          | <b>110</b> |
| Figure S1-10. Asymmetric unit of $AsF_5 \cdot NCCH_2CN \cdot AsF_5$ .....                                                                           | 110        |
| Figure S2-10. Packing of $AsF_5 \cdot NCCH_2CN \cdot AsF_5$ in the unit cell. View along the 010 direction.....                                     | 110        |
| Figure S3-10. Packing of $AsF_5 \cdot NCCH_2CN \cdot AsF_5$ in the unit cell. View along the 001 direction.....                                     | 110        |
| Table S1-10. Sample and crystal data for $AsF_5 \cdot NCCH_2CN \cdot AsF_5$ .....                                                                   | 111        |
| Table S2-10. Data collection and structure refinement for $AsF_5 \cdot NCCH_2CN \cdot AsF_5$ .....                                                  | 111        |
| Table S3-10. Atomic coordinates and equivalent isotropic atomic displacement param. ( $\text{\AA}^2$ ) for $AsF_5 \cdot NCCH_2CN \cdot AsF_5$ ..... | 112        |
| Table S4-10. Bond lengths ( $\text{\AA}$ ) for $AsF_5 \cdot NCCH_2CN \cdot AsF_5$ .....                                                             | 112        |
| Table S5-10. Bond angles ( $^\circ$ ) for $AsF_5 \cdot NCCH_2CN \cdot AsF_5$ .....                                                                  | 112        |
| Table S6-10. Anisotropic atomic displacement parameters ( $\text{\AA}^2$ ) for $AsF_5 \cdot NCCH_2CN \cdot AsF_5$ .....                             | 113        |
| Table S7-10. Hydrogen atomic coordinates and isotropic atomic displacement param. ( $\text{\AA}^2$ ) for $AsF_5 \cdot NCCH_2CN \cdot AsF_5$ .....   | 114        |
| <b><math>C_6H_5CN \cdot AsF_5</math></b> .....                                                                                                      | <b>115</b> |
| Figure S1-11. Molecular unit of $C_6H_5CN \cdot AsF_5$ (2-fold rotation axis in green).....                                                         | 115        |
| Figure S2-11. Packing of $C_6H_5CN \cdot AsF_5$ in the unit cell. View along the 010 direction.....                                                 | 115        |
| Figure S3-11. Packing of $C_6H_5CN \cdot AsF_5$ in the unit cell. View along the 100 direction.....                                                 | 115        |
| Table S1-11. Sample and crystal data for $C_6H_5CN \cdot AsF_5$ .....                                                                               | 116        |

|                                                                                                                                             |            |
|---------------------------------------------------------------------------------------------------------------------------------------------|------------|
| Table S2-11. Data collection and structure refinement for $C_6H_5CN \cdot AsF_5$ .....                                                      | 116        |
| Table S3-11. Atomic coordinates and equivalent isotropic atomic displacement parameters ( $\text{\AA}^2$ ) for $C_6H_5CN \cdot AsF_5$ ..... | 117        |
| Table S4-11. Bond lengths ( $\text{\AA}$ ) for $C_6H_5CN \cdot AsF_5$ .....                                                                 | 117        |
| Table S5-11. Bond angles ( $^\circ$ ) for $C_6H_5CN \cdot AsF_5$ .....                                                                      | 117        |
| Table S6-11. Torsion angles ( $^\circ$ ) for $C_6H_5CN \cdot AsF_5$ .....                                                                   | 118        |
| Table S7-11. Anisotropic atomic displacement parameters ( $\text{\AA}^2$ ) for $C_6H_5CN \cdot AsF_5$ .....                                 | 118        |
| Table S8-11. Hydrogen atomic coordinates and isotropic atomic displacement parameters ( $\text{\AA}^2$ ) for $C_6H_5CN \cdot AsF_5$ .....   | 118        |
| <b>References .....</b>                                                                                                                     | <b>119</b> |

## Experimental Details

### General

#### Materials and Apparatus

All reactions were carried out in either Teflon-FEP ampules or NMR tubes that were closed by stainless steel valves. Volatile materials were handled in grease-less Pyrex glass or in stainless steel/Teflon-FEP vacuum line.<sup>1</sup> Reaction vessels and the stainless steel vacuum line were passivated with  $\text{ClF}_3$  prior to use. Non-volatile materials were handled in the dry nitrogen atmosphere of a glove box. Sulfur dioxide (Matheson Tri-Gas) was dried by storage over  $\text{CaH}_2$ .  $\text{AsF}_5$  was prepared from  $\text{AsF}_3$  and  $\text{F}_2$ .<sup>2-4</sup>  $\text{SbF}_5$  (Ozark Mahoning) was triple distilled before use. HCN was prepared by reacting stearic acid with KCN at 120 °C. Malononitrile (Sigma-Aldrich) was purified by recrystallization from hot ethanol. Butyronitrile, cyclopropanecarbonitrile, trimethylacetone nitrile and benzonitrile (all Sigma-Aldrich) were used as received. The NMR spectra were recorded 298 K unless otherwise stated on Bruker AMX-500 or Varian Mercury 400 or VNMRS-500 spectrometers. Spectra were externally referenced to neat tetramethylsilane for  $^1\text{H}$  and  $^{13}\text{C}$  NMR spectra, to neat nitromethane for  $^{14}\text{N}$  NMR spectra and to 80%  $\text{CFCl}_3$  in chloroform-d for  $^{19}\text{F}$  NMR spectra. Raman spectra were recorded directly in the Teflon reactors in the range 4000–80  $\text{cm}^{-1}$  on a Vertex 70/RAM II spectrophotometer, using a Nd-YAG laser at 1064 nm.

#### Crystal Structure Determination

The single-crystal X-ray diffraction data were collected on a Bruker SMART APEX DUO 3-circle platform diffractometer, equipped with an APEX II CCD, using Mo K $\alpha$  radiation (TRIUMPH curved-crystal monochromator) from a fine-focus tube or Cu K $\alpha$  radiation (multi-layeroptics monochromator) from a  $1\mu\text{S}$  microsource. The diffractometer was equipped with an Oxford Cryosystems Cryostream 700 apparatus for low-temperature data collection. The frames were integrated using the SAINT algorithm to give the hkl files corrected for Lp/decay.<sup>5</sup> The absorption correction was performed using the SADABS program.<sup>6</sup> The structures were solved by intrinsic phasing and refined on  $F^2$  using the Bruker SHELXTL Software Package and ShelXle.<sup>7-11</sup> All non-hydrogen atoms were refined anisotropically. ORTEP drawings were prepared using the Mercury CSD program.<sup>12</sup> Further crystallographic details can be obtained from the Cambridge Crystallographic Data Centre (CCDC, 12 Union Road, Cambridge CB21EZ, UK (Fax: (+44) 1223-336-033; e-mail: deposit@ccdc.cam.ac.uk) on quoting the deposition no. 1855712-1855722.

#### Preparation of $\text{RCN}\cdot\text{AsF}_5$ (R = H, $\text{CH}_2\text{CN}$ , $\text{C}_3\text{H}_7$ , $\text{c-C}_3\text{H}_5$ , $\text{C}(\text{CH}_3)_3$ , $\text{C}_6\text{H}_5$ )

Anhydrous  $\text{SO}_2$  (2.0 mL) and  $\text{AsF}_5$  (1.65 mmol, 1.1 eq.) were condensed into a Teflon-FEP ampule containing a frozen sample of hydrogen cyanide or the corresponding nitrile (1.5 mmol, 1.0 eq.) at -196 °C. The mixture was allowed to warm to -64 °C, kept at this temperature for 10 min and sporadically agitated. The volatile compounds were removed *in vacuo* at -64 °C, leaving behind a colorless solid. Single crystals were grown from  $\text{SO}_2$  solution by slow evaporation of the solvent *in vacuo* at -64 to -45 °C.

**$\text{HCN}\cdot\text{AsF}_5$**  (293 mg; weight expected for 1.50 mmol: 295 mg).

$^1\text{H}$  NMR ( $\text{SO}_2$ , unlocked, 25 °C)  $\delta$  = 7.13 (s, 1H,  $\text{HCN}\cdot\text{AsF}_5$ ).  $^{13}\text{C}$  NMR ( $\text{SO}_2$ , unlocked, 25 °C)  $\delta$  = 100.39 (s,  $\text{HCN}\cdot\text{AsF}_5$ )

$^{14}\text{N}$  NMR ( $\text{SO}_2$ , unlocked, 25 °C)  $\delta$  = -186.7 (s,  $\Delta\nu/2$  = 86 Hz,  $\text{HCN}\cdot\text{AsF}_5$ ).  $^{19}\text{F}$  NMR ( $\text{SO}_2$ , unlocked, 25 °C)  $\delta$  = -39.5 (s,  $\Delta\nu/2$  = 4150 Hz,  $\text{HCN}\cdot\text{AsF}_5$ ). Raman (-90 °C, 350 mW):  $\tilde{\nu}$ (rel. Intensity) = 3199.7 (0.3), 2191.6 (10.0), 2162.7 (0.2), 1145.8 (0.3), 806.4 (0.3), 707.8 (7.8), 674.0 (2.1), 610.6 (1.4), 414.0 (0.7), 389.5 (1.9), 363.6 (0.6), 342.6 (0.4), 294.2 (0.8), 270.6 (2.4), 175.2 (1.4), 141.0 (1.8)  $\text{cm}^{-1}$ .

**$\text{NCCH}_2\text{CN}\cdot\text{AsF}_5$**  (356 mg; weight expected for 1.50 mmol: 354 mg).

$^1\text{H}$  NMR ( $\text{SO}_2$ , unlocked, 25 °C)  $\delta$  = 5.64 (s, 2H,  $\text{CH}_2$ ).  $^{13}\text{C}$  NMR ( $\text{SO}_2$ , unlocked, 25 °C)  $\delta$  = 104.99 (s, **CN**), 10.85 (s,  $\text{CH}_2$ ).  $^{14}\text{N}$  NMR ( $\text{SO}_2$ , unlocked, 25 °C)  $\delta$  = -151.7 (s,  $\Delta\nu/2$  = 303 Hz, **CN**).  $^{14}\text{N}$  NMR ( $\text{SO}_2$ , unlocked, -55 °C)  $\delta$  = -121.4 (s,  $\Delta\nu/2$  = 668 Hz, **CN**); -187.4 (s,  $\Delta\nu/2$  = 433 Hz,  $\text{CN}\cdot\text{AsF}_5$ );  $^{19}\text{F}$  NMR ( $\text{SO}_2$ , unlocked, 25 °C)  $\delta$  = -45.1 (s,  $\Delta\nu/2$  = 1403 Hz,  $\text{AsF}_5$ ). Raman (-90 °C, 350 mW):  $\tilde{\nu}$ (rel. Intensity) = 2967.4 (2.6), 2918.9 (6.9), 2366.3 (7.5), 2291.2 (2.5), 2282.0 (2.8), 1379.0 (4.6), 1308.5 (1.4), 1206.0 (3.3), 1146.0 (0.4), 990.7 (0.4), 910.3 (1.4), 904.3 (1.2), 716.5 (8.0), 681.3 (10.0), 608.9 (2.3), 422.0 (1.7), 417.7 (1.5), 386.3 (2.2), 363.6 (1.0), 354.7 (3.9), 328.0 (1.1), 312.1 (1.3), 266.4 (1.6), 245.6 (1.0), 140.9 (4.5), 118.2 (2.6), 96.8 (1.3)  $\text{cm}^{-1}$ .

**$\text{C}_3\text{H}_7\text{CN}\cdot\text{AsF}_5$**  (350 mg; weight expected for 1.50 mmol: 359 mg).

$^1\text{H}$  NMR ( $\text{SO}_2$ , unlocked,  $25^\circ\text{C}$ )  $\delta$  = 4.28 (t,  $J$  = 7.1 Hz, 2H,  $\text{CH}_2\text{CN}$ ), 3.25 (h,  $zzJ$  = 7.3 Hz, 2H,  $\text{CH}_2\text{CH}_3$ ), 2.43 (t,  $J$  = 7.4 Hz, 3H,  $\text{CH}_3$ ).  $^{13}\text{C}$  NMR ( $\text{SO}_2$ , unlocked,  $25^\circ\text{C}$ )  $\delta$  = 113.64 (s, **CN**), 19.38 (s,  $\text{CH}_2\text{CN}$ ), 18.85 (**CH**2), 13.88 (**CH**3).  $^{14}\text{N}$  NMR ( $\text{SO}_2$ , unlocked,  $25^\circ\text{C}$ )  $\delta$  = -195.0 ppm (s,  $\Delta\frac{1}{2}$  = 74 Hz, **CN**).  $^{19}\text{F}$  NMR ( $\text{SO}_2$ , unlocked,  $25^\circ\text{C}$ )  $\delta$  = -37.6 (s, 4F,  $\Delta\frac{1}{2}$  = 255 Hz,  $\text{AsF}_4\text{F}$ ), -80.0 (s, 1F,  $\Delta\frac{1}{2}$  = 410 Hz,  $\text{AsF}_4\text{F}$ ). Raman ( $-90^\circ\text{C}$ , 350 mW):  $\tilde{\nu}$ (rel. Intensity) = 3000.6 (2.1), 2972.9 (2.9), 2964.4 (4.0), 2945.0 (2.6), 2931.5 (4.8), 2916.2 (1.0), 2886.7 (2.0), 2765.5 (0.7), 2331.2 (6.6), 2466.2 (1.2), 1454.1 (2.0), 1412.2 (1.7), 1346.3 (0.6), 1323.3 (2.4), 1258.4 (0.9), 1230.4 (0.8), 1107.7 (0.7), 1082.3 (0.6), 1046.2 (1.7), 934.6 (0.7), 873.1 (0.7), 841.1 (2.5), 718.7 (5.4), 693.8 (0.5), 670.1 (10.0), 599.8 (1.9), 574.6 (1.0), 434.7 (0.9), 400.5 (1.0), 363.8 (0.7), 342.4 (0.7), 326.5 (1.0), 250.3 (0.9), 153.8 (1.2), 114.6 (2.3), 83.9 (2.2)  $\text{cm}^{-1}$ .

**c-C<sub>3</sub>H<sub>5</sub>CN•AsF<sub>5</sub>** (354 mg; weight expected for 1.50 mmol: 356 mg).

$^1\text{H}$  NMR ( $\text{SO}_2$ , unlocked,  $25^\circ\text{C}$ )  $\delta$  = 3.16 – 3.25 (m, 1H, **CH**), 2.92 – 2.86 (m, 2H, **CHH**), 2.84 – 2.78 (m, 2H, **CHH**).  $^{13}\text{C}$  NMR ( $\text{SO}_2$ , unlocked,  $25^\circ\text{C}$ )  $\delta$  = 115.41 (s, **CN**), 11.75 (s, **CH**), -4.30 (**CHH**).  $^{14}\text{N}$  NMR ( $\text{SO}_2$ , unlocked,  $25^\circ\text{C}$ )  $\delta$  = -206.3 ppm (s,  $\Delta\frac{1}{2}$  = 80 Hz, **CN**).  $^{19}\text{F}$  NMR ( $\text{SO}_2$ , unlocked,  $25^\circ\text{C}$ )  $\delta$  = -37.8 (s, 4F,  $\Delta\frac{1}{2}$  = 260 Hz,  $\text{AsF}_4\text{F}$ ), -78.7 (s, 1F,  $\Delta\frac{1}{2}$  = 400 Hz,  $\text{AsF}_4\text{F}$ ). Raman ( $-90^\circ\text{C}$ , 350 mW):  $\tilde{\nu}$ (rel. Intensity) = 3117.9 (0.6), 3082.4 (0.7), 3065.6 (0.3), 3036.8 (1.7), 2318.1 (10.0), 2286.8 (1.2), 1608.5 (0.3), 1459.0 (2.6), 1436.1 (0.9), 1342.7 (3.9), 1192.4 (4.5), 1149.0 (0.1), 1134.7 (0.4), 1064.0 (1.5), 952.8 (2.6), 851.5 (2.6), 820.8 (0.5), 814.7 (1.8), 773.9 (1.1), 707.3 (7.7), 663.0 (3.6), 602.4 (0.9), 558.2 (1.4), 395.8 (0.5), 360.0 (1.8), 259.9 (0.9), 241.5 (0.2), 162.5 (0.8), 85.8 (0.2)  $\text{cm}^{-1}$ .

**(CH<sub>3</sub>)<sub>3</sub>CCN•AsF<sub>5</sub>** (367 mg; weight expected for 1.50 mmol: 380 mg).

$^1\text{H}$  NMR ( $\text{SO}_2$ , unlocked,  $25^\circ\text{C}$ )  $\delta$  = 2.88 (m, 9H, **(CH<sub>3</sub>)<sub>3</sub>**).  $^{13}\text{C}$  NMR ( $\text{SO}_2$ , unlocked,  $25^\circ\text{C}$ )  $\delta$  = 117.28 (s, **CN**), 30.44 (s, **C(CH<sub>3</sub>)<sub>3</sub>**), 27.27 (**CH<sub>3</sub>**).  $^{14}\text{N}$  NMR ( $\text{SO}_2$ , unlocked,  $25^\circ\text{C}$ )  $\delta$  = -196.8 ppm (s,  $\Delta\frac{1}{2}$  = 87 Hz, **CN**).  $^{19}\text{F}$  NMR ( $\text{SO}_2$ , unlocked,  $25^\circ\text{C}$ )  $\delta$  = -37.6 (s, 4F,  $\Delta\frac{1}{2}$  = 225 Hz,  $\text{AsF}_4\text{F}$ ), -80.2 (s, 1F,  $\Delta\frac{1}{2}$  = 410 Hz,  $\text{AsF}_4\text{F}$ ). Raman ( $-90^\circ\text{C}$ , 350 mW):  $\tilde{\nu}$ (rel. Intensity) = 3010.7 (3.1), 3000.2 (2.8), 2970.1 (1.8), 2946.0 (3.9), 2928.5 (1.7), 2912.7 (1.3), 2880.3 (1.1), 2795.5 (0.5), 2729.0 (0.7), 2403.0 (0.2), 2317.6 (10.0), 1484.8 (0.4), 1467.3 (5.1), 1449.5 (1.1), 1402.0 (0.6), 1206.9 (2.7), 1148.0 (0.2), 1038.7 (1.6), 940.9 (2.5), 865.6 (1.7), 708.4 (9.0), 666.0 (9.0), 607.4 (1.5), 589.8 (0.7), 435.2 (0.4), 382.5 (2.4), 369.6 (0.8), 362.7 (0.7), 352.6 (0.8), 266.7 (2.0), 192.7 (1.6), 157.5 (2.0)  $\text{cm}^{-1}$ .

**C<sub>6</sub>H<sub>5</sub>CN•AsF<sub>5</sub>** (406 mg; weight expected for 1.50 mmol: 409 mg).

$^1\text{H}$  NMR ( $\text{SO}_2$ , unlocked,  $25^\circ\text{C}$ )  $\delta$  = 9.18 (d,  $J$  = 8.2 Hz, 2H), 9.07 (t,  $J$  = 7.5 Hz, 1H), 8.82 (t,  $J$  = 7.8 Hz, 2H).  $^{13}\text{C}$  NMR ( $\text{SO}_2$ , unlocked,  $25^\circ\text{C}$ )  $\delta$  = 139.40 (s, **CH**), 136.09 (s, 2x**CH**), 131.32 (s 2x**CH**), 110.29 (s, **CN**), 104.37 (s, **CCN**).  $^{14}\text{N}$  NMR ( $\text{SO}_2$ , unlocked,  $25^\circ\text{C}$ )  $\delta$  = -185.4 ppm (s,  $\Delta\frac{1}{2}$  = 120 Hz, **CN**).  $^{19}\text{F}$  NMR ( $\text{SO}_2$ , unlocked,  $25^\circ\text{C}$ )  $\delta$  = -37.0 (s, 4F,  $\Delta\frac{1}{2}$  = 250 Hz,  $\text{AsF}_4\text{F}$ ), -80.0 (s, 1F,  $\Delta\frac{1}{2}$  = 410 Hz,  $\text{AsF}_4\text{F}$ ). Raman ( $-90^\circ\text{C}$ , 350 mW):  $\tilde{\nu}$ (rel. Intensity) = 3092.9 (1.1), 3081.3 (0.8), 2969.3 (0.1), 2597.4 (0.2), 2413.3 (0.3), 2391.5 (0.3), 2307.6 (10.0), 1597.1 (7.0), 1577.3 (0.4), 1488.3 (0.4), 1453.3 (0.3), 1329.3 (0.3), 1207.9 (3.4), 1186.5 (1.8), 1171.8 (0.7), 1128.0 (0.2), 1030.0 (0.7), 1010.0 (0.4), 1000.6 (6.1), 990.1 (0.3), 968.4 (0.3), 782.3 (0.8), 722.3 (1.0), 711.3 (2.3), 671.0 (2.8), 626.9 (1.1), 603.1 (0.5), 564.9 (0.8), 522.1 (0.4), 410.7 (0.4), 382.5 (1.0), 358.0 (1.0), 340.7 (0.4), 294.4 (0.7), 263.8 (0.6), 182.3 (0.6), 147.6 (2.8), 111.9 (4.3), 74.8 (3.9)  $\text{cm}^{-1}$ .

### Preparation of **RCN•SbF<sub>5</sub>** (R = H, $\text{CH}_2\text{CN}$ , $\text{C}_3\text{H}_7$ , c- $\text{C}_3\text{H}_5$ , $\text{C}(\text{CH}_3)_3$ , $\text{C}_6\text{H}_5$ )

Anhydrous  $\text{SO}_2$  (2.0 mL) and was condensed into a Teflon-FEP ampule containing a frozen sample of  $\text{SbF}_5$  (1.5 mmol, 1.0 eq.) at  $-196^\circ\text{C}$ . The mixture was allowed to warm to  $-64^\circ\text{C}$  forming a clear solution. A stoichiometric amount of hydrogen cyanide was condensed into the ampule at  $-196^\circ\text{C}$ . In case of the nitrile adducts, the  $\text{SbF}_5/\text{SO}_2$  mixture to  $-64^\circ\text{C}$  was transferred under a stream of dry nitrogen into a second into a second Teflon-FEP ampule containing a sample of the corresponding nitrile (1.50 mmol) at  $-78^\circ\text{C}$ . The mixture was allowed to warm to  $-64^\circ\text{C}$ , kept at this temperature for 10 min and sporadically agitated. The volatile compounds were removed *in vacuo* at  $-64^\circ\text{C}$ , leaving behind a colorless solid. Single crystals were grown from  $\text{SO}_2$  solution by slow evaporation of the solvent *in vacuo* at  $-64$  to  $-45^\circ\text{C}$ .

**HCN•SbF<sub>5</sub>** (370 mg; weight expected for 1.50 mmol: 366 mg).

$^1\text{H}$  NMR ( $\text{SO}_2$ , unlocked,  $25^\circ\text{C}$ )  $\delta$  = 7.33 (m, 1H, **HC**).  $^{13}\text{C}$  NMR ( $\text{SO}_2$ , unlocked,  $25^\circ\text{C}$ )  $\delta$  = 106.88 (s, **CN**).  $^{14}\text{N}$  NMR ( $\text{SO}_2$ , unlocked,  $25^\circ\text{C}$ )  $\delta$  = -194.6 (s,  $\Delta\frac{1}{2}$  = 104 Hz, **CN•Sb**).  $^{19}\text{F}$  NMR ( $\text{SO}_2$ , unlocked,  $25^\circ\text{C}$ )  $\delta$  = -100.6 (s, 4F,  $\Delta\frac{1}{2}$  = 1190 Hz,  $\text{SbF}_4\text{F}$ ), -133.2 (s, 1F,  $\Delta\frac{1}{2}$  = 1150 Hz,  $\text{SbF}_4\text{F}$ ). Raman ( $-90^\circ\text{C}$ , 350 mW):  $\tilde{\nu}$ (rel. Intensity) = 3151.3 (0.2), 2176.7 (10.0), 2148.4 (0.3), 1145.5 (0.3), 686.1 (0.5), 663.2 (9.5), 639.3 (2.6), 600.6 (1.3), 381.4 (0.8), 327.5 (0.7), 294.4 (2.0), 288.9 (1.3), 278.3 (0.7), 260.1 (0.6), 220.6 (1.4), 207.0 (1.5), 154.1 (1.1)  $\text{cm}^{-1}$ .

**NCCH<sub>2</sub>CN•SbF<sub>5</sub>** (428 mg; weight expected for 1.50 mmol: 424 mg).

$^1\text{H}$  NMR ( $\text{SO}_2$ , unlocked,  $25^\circ\text{C}$ )  $\delta$  = 5.59 (s, 2H, **CH<sub>2</sub>**).  $^{13}\text{C}$  NMR ( $\text{SO}_2$ , unlocked,  $25^\circ\text{C}$ )  $\delta$  = 110.38 (s, **CN**), 106.75 (s, **CN•SbF<sub>5</sub>**), 11.23 (s, **CH<sub>2</sub>**).  $^{14}\text{N}$  NMR ( $\text{SO}_2$ , unlocked,  $25^\circ\text{C}$ )  $\delta$  = -123.1 (s,  $\Delta\frac{1}{2}$  = 443 Hz, **CN**); -192.3 (s,  $\Delta\frac{1}{2}$  = 270 Hz, **CN•SbF<sub>5</sub>**).  $^{19}\text{F}$  NMR ( $\text{SO}_2$ , unlocked,  $25^\circ\text{C}$ )  $\delta$  = -100.1 (s, 4F,  $\Delta\frac{1}{2}$  = 564 Hz,  $\text{SbF}_4\text{F}$ ), -133.5 (s, 1F,  $\Delta\frac{1}{2}$  = 503 Hz,  $\text{SbF}_4\text{F}$ ). Raman ( $-90^\circ\text{C}$ , 350 mW):  $\tilde{\nu}$ (rel. Intensity) = 2960.8

(1.9), 2951.3 (0.9), 2919.2 (4.3), 2908.9 (2.1), 2366.9 (2.6), 2357.6 (6.5), 2290.8 (2.0), 1373.8 (3.2), 1360.9 (1.3), 1325.7 (1.1), 1313.3 (1.0), 1204.2 (1.7), 1151.1 (5.9), 909.7 (1.3), 903.2 (0.8), 701.9 (0.9), 679.6 (2.6), 666.7 (10.0), 654.5 (2.9), 648.2 (4.5), 605.2 (1.9), 600.7 (2.3), 528.3 (1.1), 387.0 (2.2), 353.7 (1.9), 290.4 (3.0), 280.5 (2.3), 263.7 (1.7), 247.6 (1.6), 228.5 (1.3), 197.6 (2.0), 139.2 (2.9), 114.2 (2.7), 92.2 (2.3)  $\text{cm}^{-1}$ .

**C<sub>3</sub>H<sub>7</sub>CN•SbF<sub>5</sub>** (429 mg; weight expected for 1.50 mmol: 429 mg).

<sup>1</sup>H NMR (SO<sub>2</sub>, unlocked, 25 °C)  $\delta$  = 4.12 (t, J = 7.1+ Hz, 2H, CH<sub>2</sub>CN), 3.05 (h, J = 7.3 Hz, 2H, CH<sub>2</sub>CH<sub>3</sub>), 2.21 (t, J = 7.4 Hz, 3H, CH<sub>3</sub>). <sup>13</sup>C NMR (SO<sub>2</sub>, unlocked, 25 °C)  $\delta$  = 121.51 (s, CN), 19.55 (s, CH<sub>2</sub>CN), 18.68 (CH<sub>2</sub>), 13.64 (CH<sub>3</sub>). <sup>14</sup>N NMR (SO<sub>2</sub>, unlocked, 25 °C)  $\delta$  = -202.5 (s,  $\Delta\frac{1}{2}$ = 94 Hz, CN). <sup>19</sup>F NMR (SO<sub>2</sub>, unlocked, 25 °C)  $\delta$  = -101.1 (s, 4F,  $\Delta\frac{1}{2}$ = 780 Hz, SbF<sub>4</sub>F), -130.4 (s, 1F,  $\Delta\frac{1}{2}$ = 800 Hz, SbF<sub>4</sub>F). Raman (-90 °C, 350 mW):  $\tilde{\nu}$ (rel. Intensity) = 2944.6 (2.8), 2928.6 (4.9), 2885.1 (2.3), 2764.7 (0.8), 2317.2 (8.9), 1465.1 (1.9), 1454.6 (2.6), 1411.1 (2.4), 1321.1 (2.8), 1255.9 (1.6), 1105.7 (1.5), 1080.7 (1.4), 1044.7 (2.1), 933.9 (1.3), 871.6 (1.5), 841.9 (2.8), 686.3 (3.7), 672.0 (6.4), 652.3 (2.2), 640.4 (10.0), 576.3 (3.0), 407.5 (2.1), 199.6 (2.3), 145.7 (2.2), 108.9 (3.4)  $\text{cm}^{-1}$ .

**c-C<sub>3</sub>H<sub>5</sub>CN•SbF<sub>5</sub>** (415 mg; weight expected for 1.50 mmol: 426 mg).

<sup>1</sup>H NMR (SO<sub>2</sub>, unlocked, 25 °C)  $\delta$  = 3.12 – 3.01 (m, 1H, CH), 2.80 – 2.72 (m, 2H, CHH), 2.72 – 2.64 (m, 2H, CHH). <sup>13</sup>C NMR (SO<sub>2</sub>, unlocked, 25 °C)  $\delta$  = 123.56 (s, CN), 12.80 (s, CH), -3.87 (CHH). <sup>14</sup>N NMR (SO<sub>2</sub>, unlocked, 25 °C)  $\delta$  = -213.8 ppm (s,  $\Delta\frac{1}{2}$ = 75 Hz, CN). <sup>19</sup>F NMR (SO<sub>2</sub>, unlocked, 25 °C)  $\delta$  = -101.0 (s, 4F,  $\Delta\frac{1}{2}$ = 757 Hz, SbF<sub>4</sub>F), -128.8 (s, 1F,  $\Delta\frac{1}{2}$ = 890 Hz, SbF<sub>4</sub>F). Raman (-90 °C, 350 mW):  $\tilde{\nu}$ (rel. Intensity) = 3120.1 (0.9), 3063.1 (0.6), 3035.9 (2.4), 2306.7 (10.0), 2281.3 (3.3), 1457.7 (3.0), 1435.5 (1.1), 1359.7 (0.4), 1342.4 (4.3), 1190.1 (7.3), 1056.9 (2.3), 951.2 (4.2), 844.5 (1.8), 822.7 (1.5), 811.3 (2.9), 768.9 (2.2), 683.1 (1.0), 664.1 (9.2), 652.7 (1.4), 639.1 (4.8), 559.0 (2.5), 278.9 (0.5), 229.9 (0.5), 207.7 (1.4), 153.8 (1.0), 115.2 (0.5), 241.5 (0.2), 162.5 (0.7), 85.8 (0.2)  $\text{cm}^{-1}$ .

**(CH<sub>3</sub>)<sub>3</sub>CCN•SbF<sub>5</sub>** (438 mg; weight expected for 1.50 mmol: 450 mg).

<sup>1</sup>H NMR (SO<sub>2</sub>, unlocked, 25 °C)  $\delta$  = 2.81 (m, 9H, (CH<sub>3</sub>)<sub>3</sub>). <sup>13</sup>C NMR (SO<sub>2</sub>, unlocked, 25 °C)  $\delta$  = 125.08 (s, CN), 30.70 (s, C(CH<sub>3</sub>)<sub>3</sub>), 27.15 (CH<sub>3</sub>). <sup>14</sup>N NMR (SO<sub>2</sub>, unlocked, 25 °C)  $\delta$  = -204.0 ppm (s,  $\Delta\frac{1}{2}$ = 118 Hz, CN). <sup>19</sup>F NMR (SO<sub>2</sub>, unlocked, 25 °C)  $\delta$  = -100.9 (s, 4F,  $\Delta\frac{1}{2}$ = 620 Hz, SbF<sub>4</sub>F), -130.2 (s, 1F,  $\Delta\frac{1}{2}$ = 740 Hz, SbF<sub>4</sub>F). Raman (-90 °C, 350 mW):  $\tilde{\nu}$ (rel. Intensity) = 3011.0 (4.1), 3000.6 (3.1), 2969.0 (2.1), 2944.9 (4.8), 2928.1 (1.7), 2912.8 (1.7), 2879.2 (1.3), 2792.6 (0.6), 2727.9 (0.8), 2401.1 (0.5), 2305.8 (9.6), 1483.7 (1.0), 1466.7 (5.1), 1449.2 (2.0), 1400.9 (1.2), 1232.6 (0.9), 1205.1 (3.2), 1147.5 (0.9), 1037.8 (2.0), 940.9 (2.9), 864.3 (2.3), 718.5 (2.2), 697.7 (1.8), 689.9 (1.8), 678.5 (1.6), 663.5 (10.0), 649.4 (2.2), 637.9 (6.1), 600.1 (1.6), 590.6 (1.4), 436.6 (1.3), 365.0 (1.7), 295.9 (2.2), 285.9 (2.8), 278.0 (2.0), 265.2 (1.5), 231.6 (1.5), 207.5 (4.1), 192.1 (2.2), 143.7 (1.6)  $\text{cm}^{-1}$ .

**C<sub>6</sub>H<sub>5</sub>CN•SbF<sub>5</sub>** (481 mg; weight expected for 1.50 mmol: 480 mg).

<sup>1</sup>H NMR (SO<sub>2</sub>, unlocked, 25 °C)  $\delta$  = 9.37 (d, J = 7.4 Hz, 2H), 9.24 (t, J = 7.4 Hz, 1H), 8.97 (t, J = 8.1 Hz, 2H). <sup>13</sup>C NMR (SO<sub>2</sub>, unlocked, 25 °C)  $\delta$  = 140.19 (s, CH), 136.77 (s, 2xCH), 131.55 (s, 2xCH), 117.92 (s, CN), 103.90 (s, CCN). <sup>14</sup>N NMR (SO<sub>2</sub>, unlocked, 25 °C)  $\delta$  = -192.6 ppm (s,  $\Delta\frac{1}{2}$ = 145 Hz, CN). <sup>19</sup>F NMR (SO<sub>2</sub>, unlocked, 25 °C)  $\delta$  = -100.8 (s, 4F,  $\Delta\frac{1}{2}$ = 490 Hz, SbF<sub>4</sub>F), -130.3 (s, 1F,  $\Delta\frac{1}{2}$ = 580 Hz, SbF<sub>4</sub>F). Raman (-90 °C, 350 mW):  $\tilde{\nu}$ (rel. Intensity) = 3092.4 (1.3), 2281.8 (9.6), 2263.6 (1.1), 1620.8 (0.5), 1592.9 (10.0), 1564.4 (0.7), 1519.3 (0.3), 1485.9 (0.5), 1452.9 (0.4), 1328.2 (0.6), 1303.4 (0.8), 1282.6 (1.1), 1209.5 (3.4), 1182.4 (2.4), 1149.0 (0.3), 1125.8 (0.4), 1024.7 (1.8), 1010.0 (0.5), 1000.0 (7.0), 989.2 (0.4), 958.5 (0.3), 834.0 (0.3), 779.0 (1.1), 673.8 (2.4), 641.3 (3.7), 626.9 (1.3), 612.0 (0.3), 591.5 (0.6), 565.4 (0.9), 525.3 (0.7), 2416.4 (0.2), 2390.9 (0.3), 271.3 (0.9), 201.7 (1.0), 138.9 (4.4), 289.7 (1.4)  $\text{cm}^{-1}$ .

### Preparation of AsF<sub>5</sub>•NCCH<sub>2</sub>CN•AsF<sub>5</sub>

Anhydrous SO<sub>2</sub> (3.0 mL) and AsF<sub>5</sub> (3.3 mmol, 2.2 eq.) were condensed into a Teflon-FEP ampule containing a frozen sample of malononitrile (1.5 mmol, 1.0 eq.) at -196 °C. The mixture was allowed to warm to -64 °C, kept at this temperature for 10 min and sporadically agitated. The volatile compounds were removed *in vacuo* at -64 °C, leaving behind a colorless solid. Single crystals were grown from SO<sub>2</sub> solution by slow evaporation of the solvent *in vacuo* at -64 to -45 °C.

**AsF<sub>5</sub>•NCCH<sub>2</sub>CN•AsF<sub>5</sub>** (602 mg; weight expected for 1.50 mmol: 608 mg).

<sup>1</sup>H NMR (SO<sub>2</sub>, unlocked, 25 °C)  $\delta$  = 5.95 (s, 2H, CH<sub>2</sub>). <sup>13</sup>C NMR (SO<sub>2</sub>, unlocked, 25 °C)  $\delta$  = 100.83 (s, CN), 11.76 (s, CH<sub>2</sub>). <sup>14</sup>N NMR (SO<sub>2</sub>, unlocked, 25 °C)  $\delta$  = -175.8 (s,  $\Delta\frac{1}{2}$ = 414 Hz, CN•AsF<sub>5</sub>). <sup>19</sup>F NMR (SO<sub>2</sub>, unlocked, 25 °C)  $\delta$  = -45.3 (s,  $\Delta\frac{1}{2}$ = 487 Hz, AsF<sub>5</sub>). Raman (-90 °C, 350 mW):  $\tilde{\nu}$ (rel. Intensity) = 2963.9 (0.9), 2926.5 (3.0), 2376.9 (4.1), 2369.0 (2.2), 1370.9 (1.3), 1331.9 (1.2), 1327.7 (1.6), 1311.9 (0.3), 1213.6 (0.4), 1154.4 (10.0), 1147.2 (0.7), 914.5 (0.4), 724.1 (3.6), 719.7 (1.8), 692.2 (4.9), 682.5 (2.1), 618.2 (0.5), 606.9 (1.5), 524.5 (0.8), 421.1 (0.8), 388.6 (1.1), 355.8 (0.4), 317.3 (1.2), 309.2 (0.6), 270.1 (0.9), 222.0 (0.5), 101.3 (1.4), 81.2 (1.8)  $\text{cm}^{-1}$ .



### Preparation of $\text{SbF}_5 \cdot \text{NCCH}_2\text{CN} \cdot \text{SbF}_5$

Anhydrous  $\text{SO}_2$  (2.0 mL) and was condensed into a Teflon-FEP ampule containing a frozen sample of  $\text{SbF}_5$  (3 mmol, 2.0 eq.) at  $-196$  °C. The mixture was allowed to warm to  $-64$  °C forming a clear solution. The cold mixture was transferred under a stream of dry nitrogen into a second Teflon-FEP ampule containing a sample of the corresponding nitrile (1.50 mmol, 1.0 eq.) at  $-78$  °C. The mixture was allowed to warm to  $-64$  °C, kept at this temperature for 10 min and sporadically agitated. The volatile compounds were removed *in vacuo* at  $-64$  °C, leaving behind a colorless solid.

**$\text{SbF}_5 \cdot \text{NCCH}_2\text{CN} \cdot \text{SbF}_5$**  (756 mg; weight expected for 1.50 mmol: 749 mg).

$^1\text{H}$  NMR ( $\text{SO}_2$ , unlocked,  $25^\circ\text{C}$ )  $\delta$  = 6.36 (s, 2H,  $\text{CH}_2$ ).  $^{13}\text{C}$  NMR ( $\text{SO}_2$ , unlocked,  $25^\circ\text{C}$ )  $\delta$  = 106.25 (s,  $\text{CN}$ ), 13.23 (s,  $\text{CH}_2$ ).  $^{14}\text{N}$  NMR ( $\text{SO}_2$ , unlocked,  $25^\circ\text{C}$ )  $\delta$  =  $-186.1$  (s,  $\Delta\frac{1}{2}$ = 325 Hz,  $\text{CN} \cdot \text{SbF}_5$ ).  $^{19}\text{F}$  NMR ( $\text{SO}_2$ , unlocked,  $25^\circ\text{C}$ )  $\delta$  =  $-99.5$  (s, 4F,  $\Delta\frac{1}{2}$ = 538 Hz,  $\text{SbF}_4\text{F}$ ),  $-134.7$  (s, 1F,  $\Delta\frac{1}{2}$ = 420 Hz,  $\text{SbF}_4\text{F}$ ). Raman ( $-90$  °C, 350 mW):  $\tilde{\nu}$ (rel. Intensity) = 2951.3 (1.1), 2909.0 (2.8), 2367.3 (3.4), 2354.8 (2.1), 2329.8 (0.3), 1382.6 (1.0), 1361.0 (1.3), 1325.8 (1.5), 1316.7 (2.2), 1151.1 (10.0), 1107.6 (0.5), 1085.8 (0.7), 909.1 (0.3), 701.8 (0.9), 679.7 (3.6), 668.1 (7.4), 663.5 (4.6), 654.7 (4.1), 645.2 (3.2), 619.8 (1.0), 605.5 (1.6), 578.8 (0.8), 540.7 (0.9), 528.4 (1.5), 406.1 (1.8), 387.1 (1.7), 295.8 (3.4), 263.3 (1.5), 230.7 (2.1), 199.6 (1.6), 135.5 (1.8), 92.1 (2.9)  $\text{cm}^{-1}$ .

## NMR Spectra

## HCN

 $^1\text{H}$  - HCN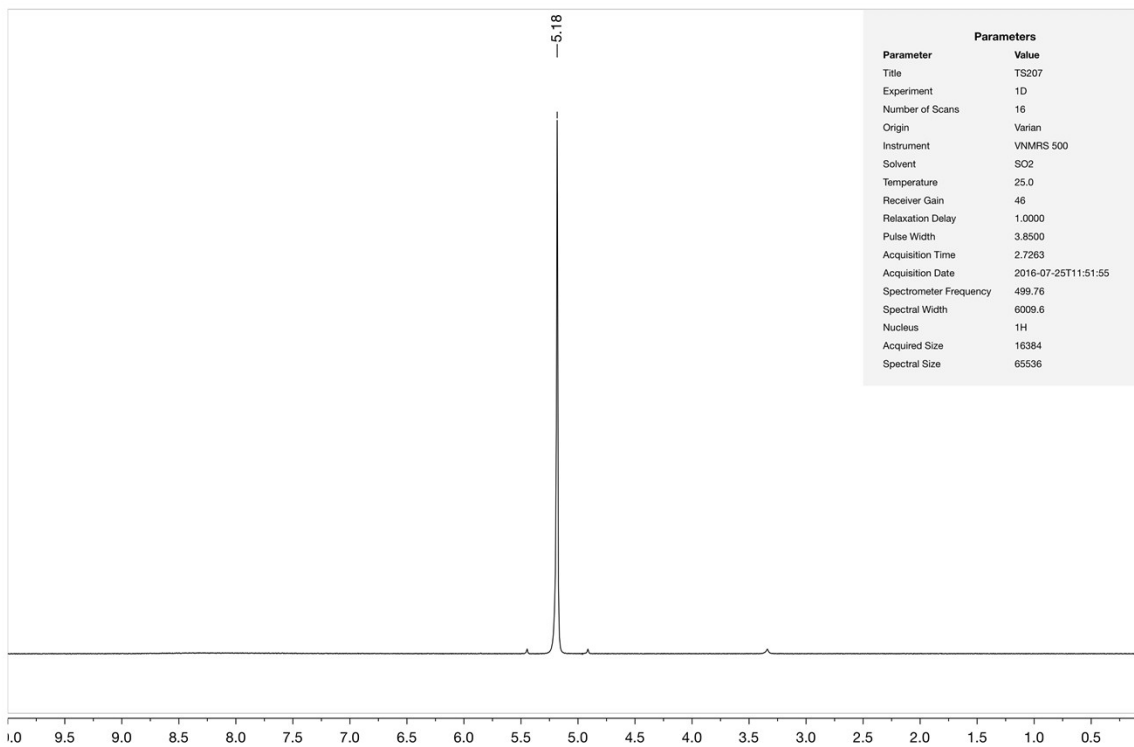

$^{13}\text{C}$  - HCN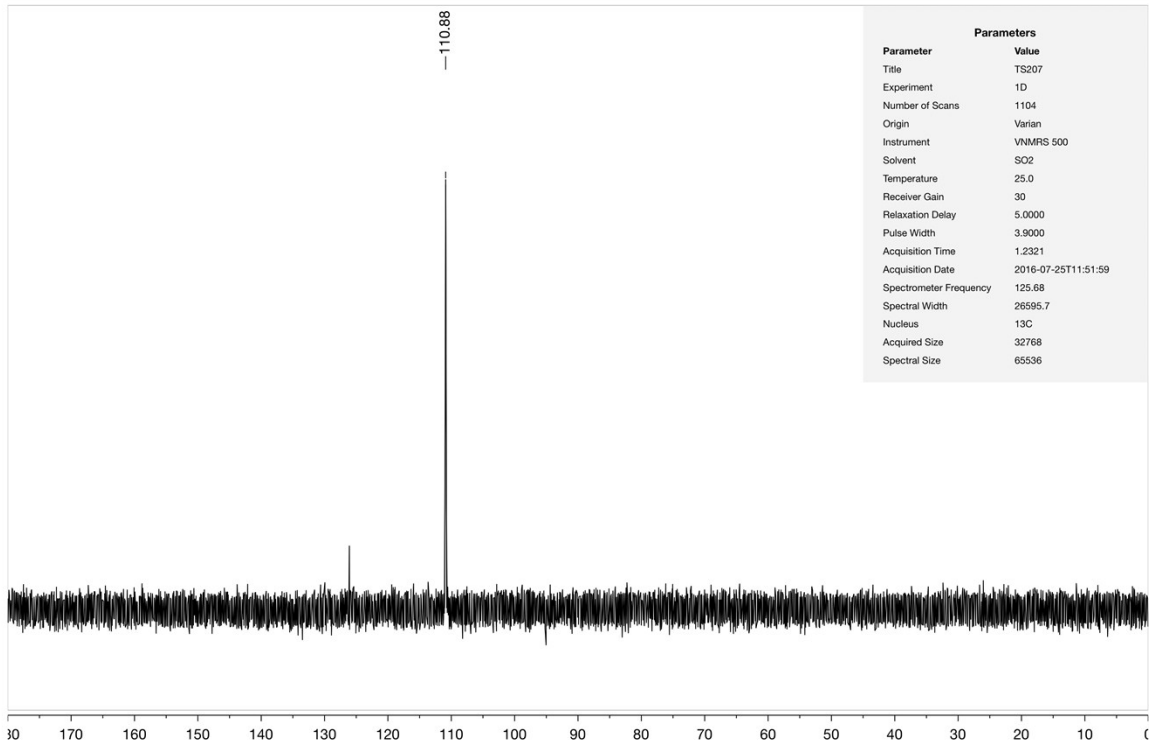 $^{14}\text{N}$  - HCN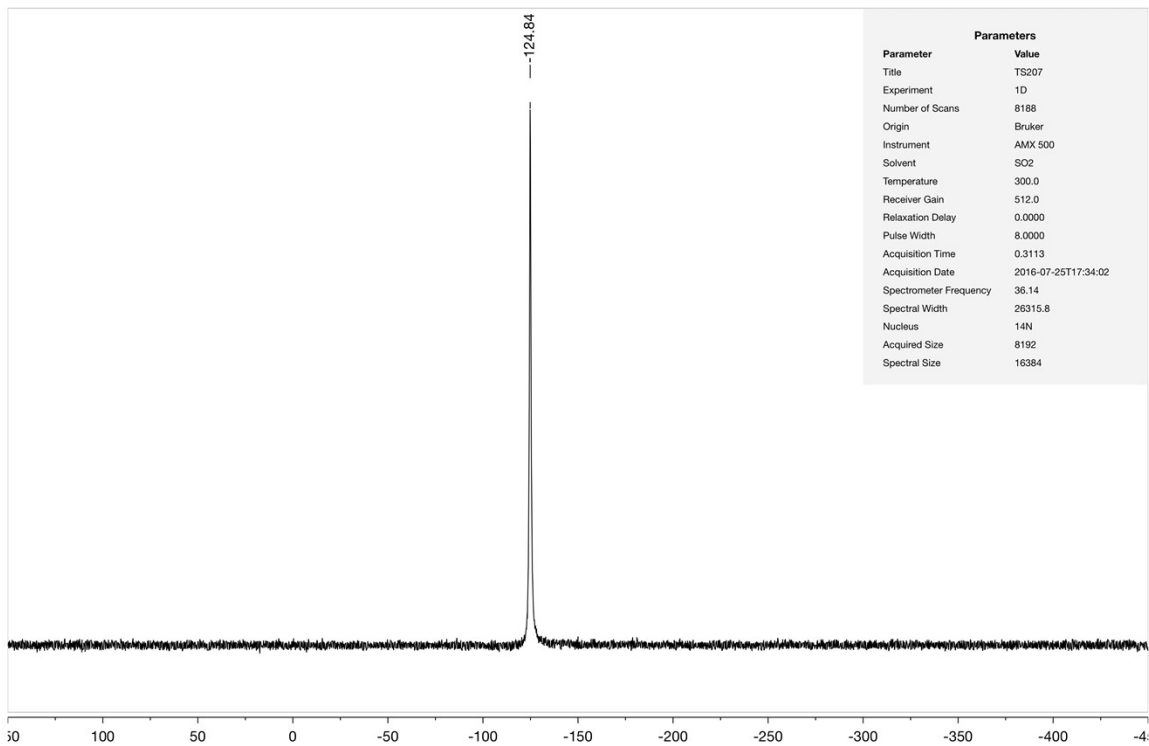

**HCN·AsF<sub>5</sub>**<sup>1</sup>H - HCN·AsF<sub>5</sub>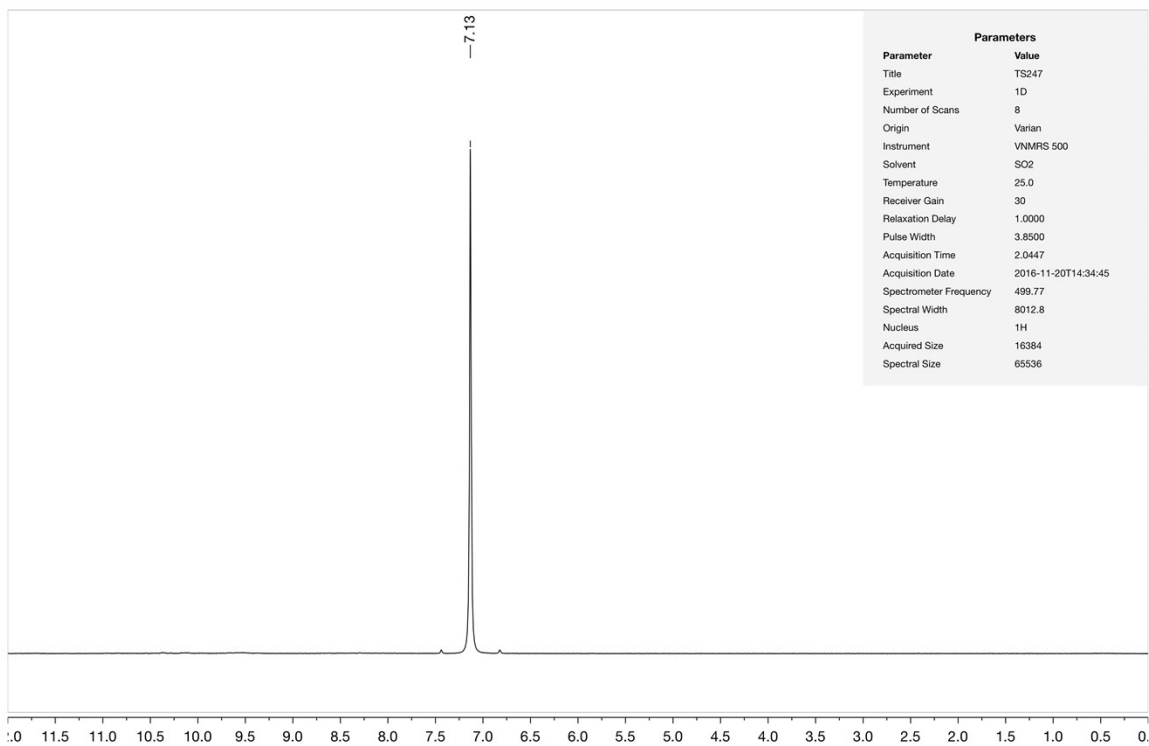<sup>13</sup>C - HCN·AsF<sub>5</sub>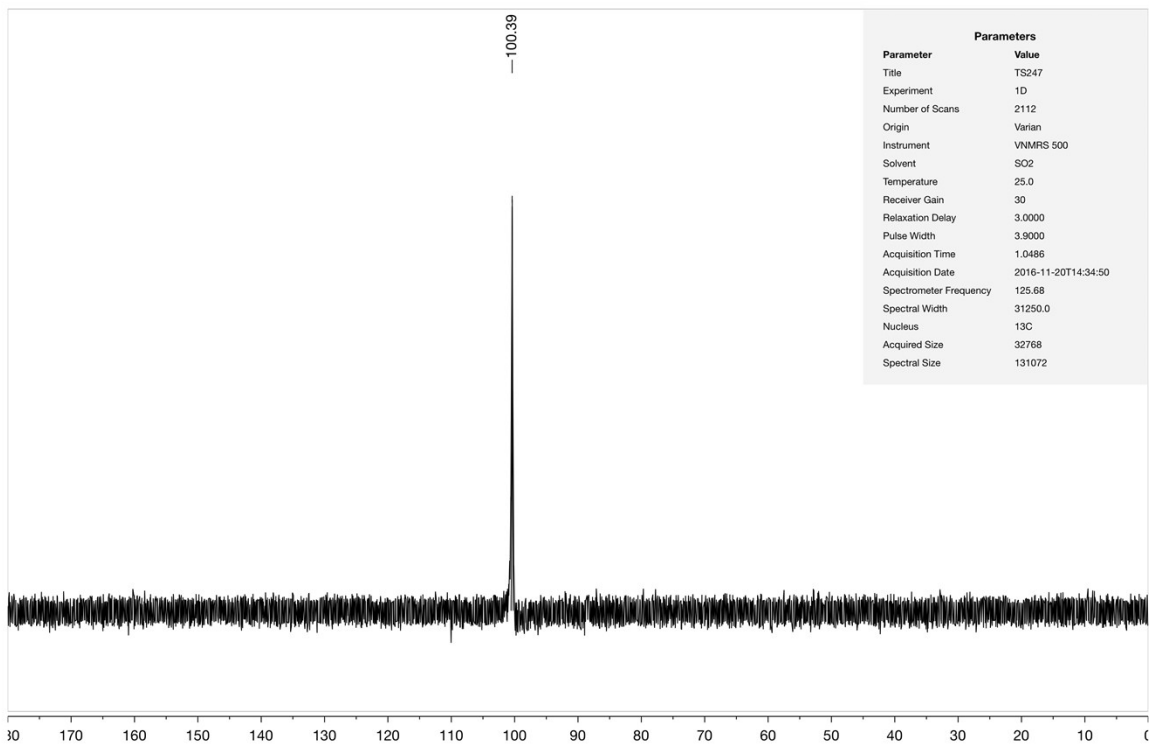

$^{14}\text{N}$  -  $\text{HCN}\cdot\text{AsF}_5$ 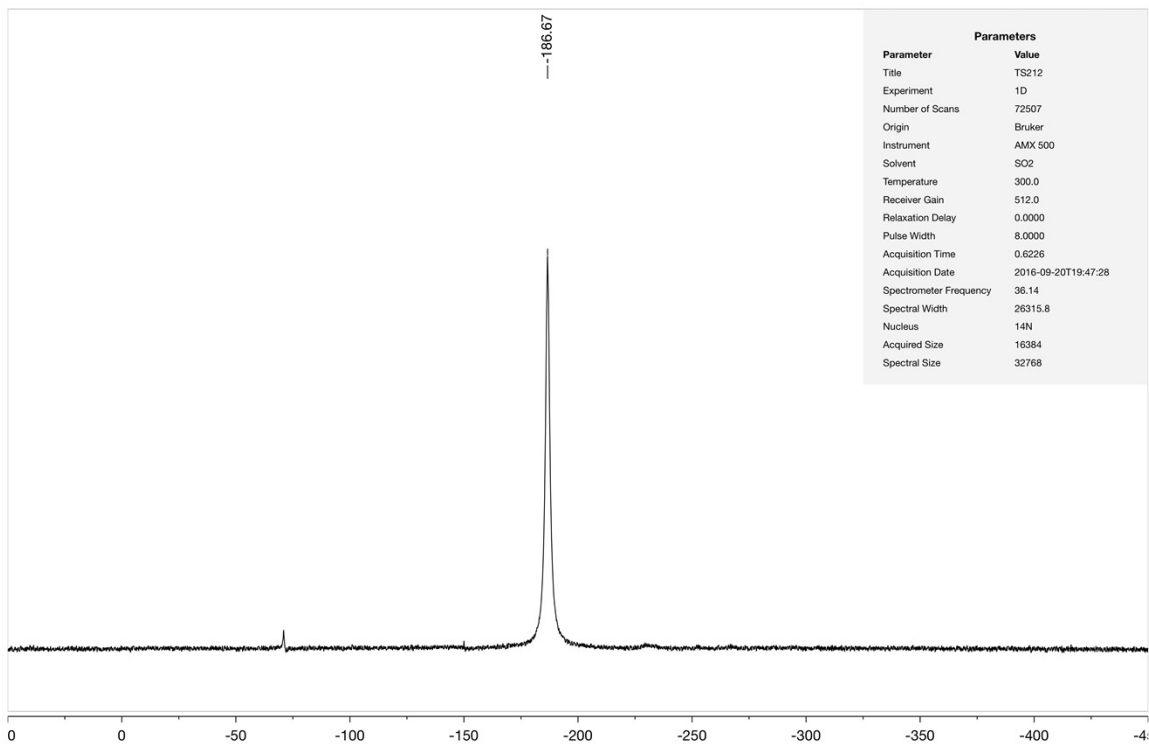 $^{19}\text{F}$  -  $\text{HCN}\cdot\text{AsF}_5$ 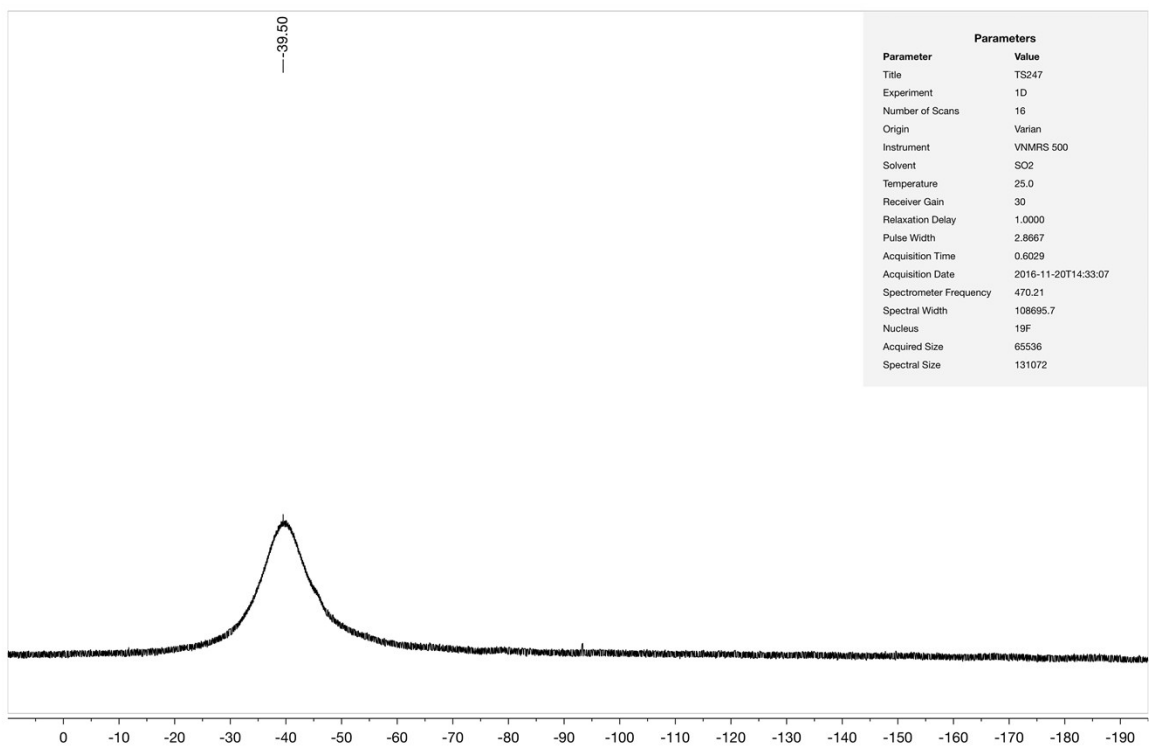

**HCN·SbF<sub>5</sub>**<sup>1</sup>H - HCN·SbF<sub>5</sub>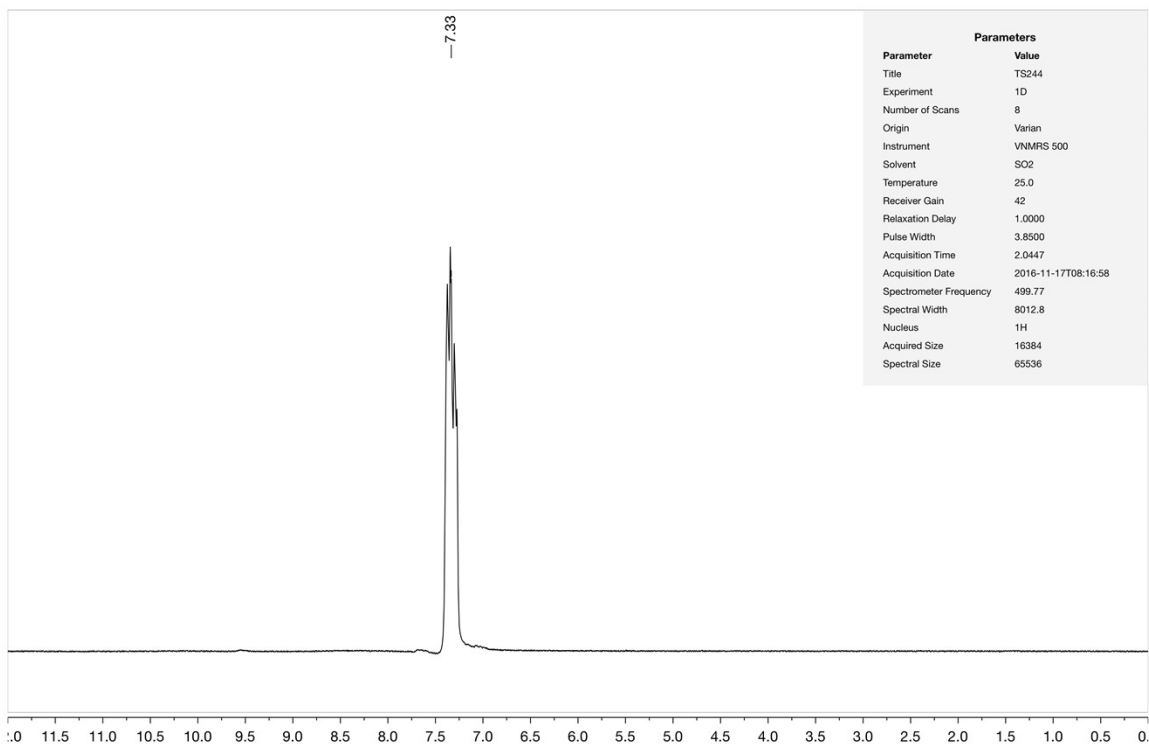<sup>13</sup>C - HCN·SbF<sub>5</sub>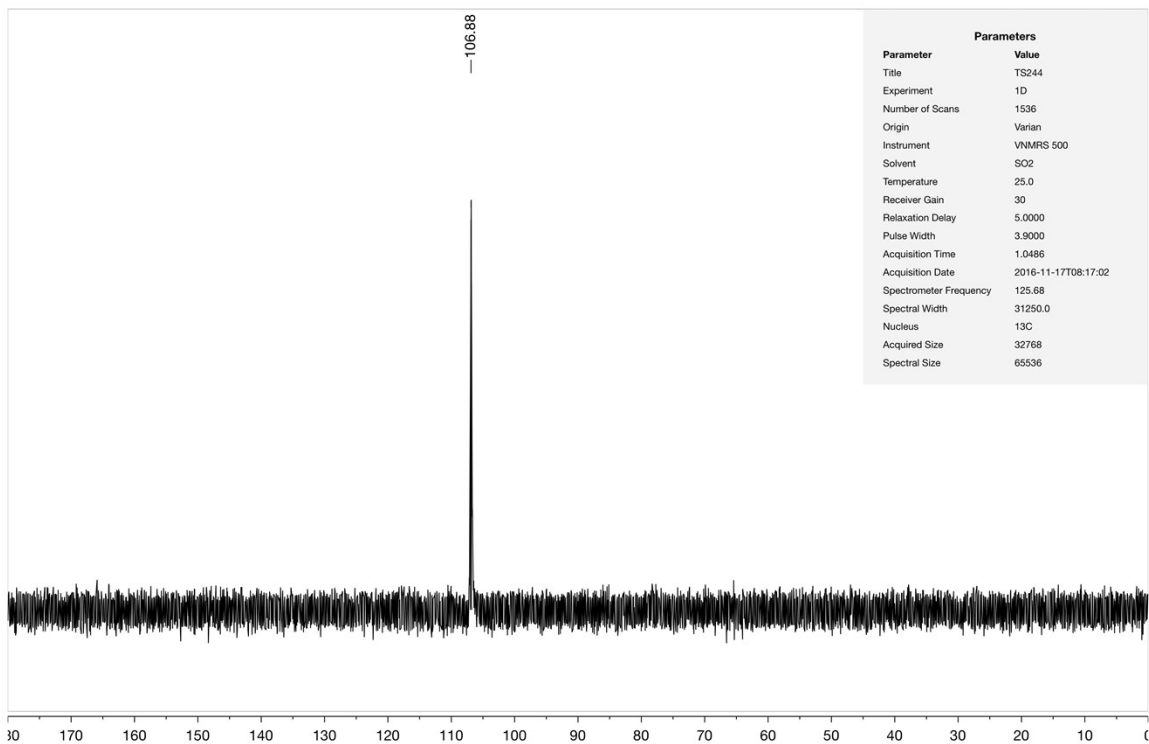

$^{14}\text{N}$  -  $\text{HCN}\cdot\text{SbF}_5$ 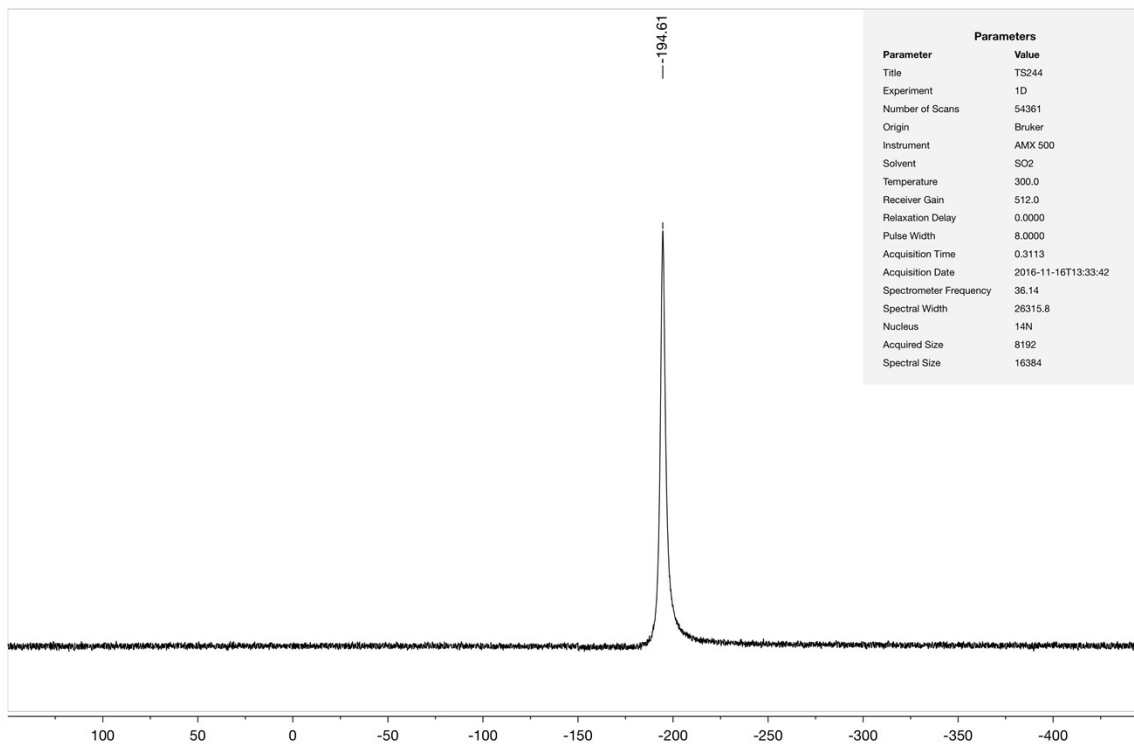 $^{19}\text{F}$  -  $\text{HCN}\cdot\text{SbF}_5$ 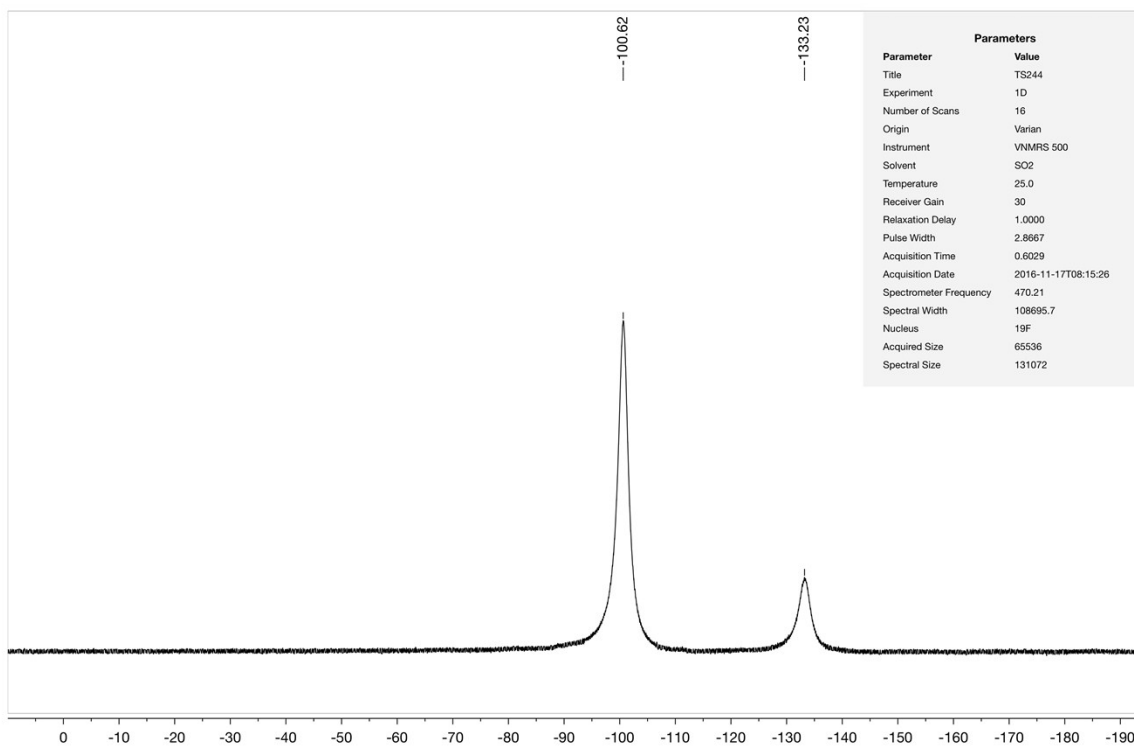

NCCH<sub>2</sub>CN<sup>1</sup>H - NCCH<sub>2</sub>CN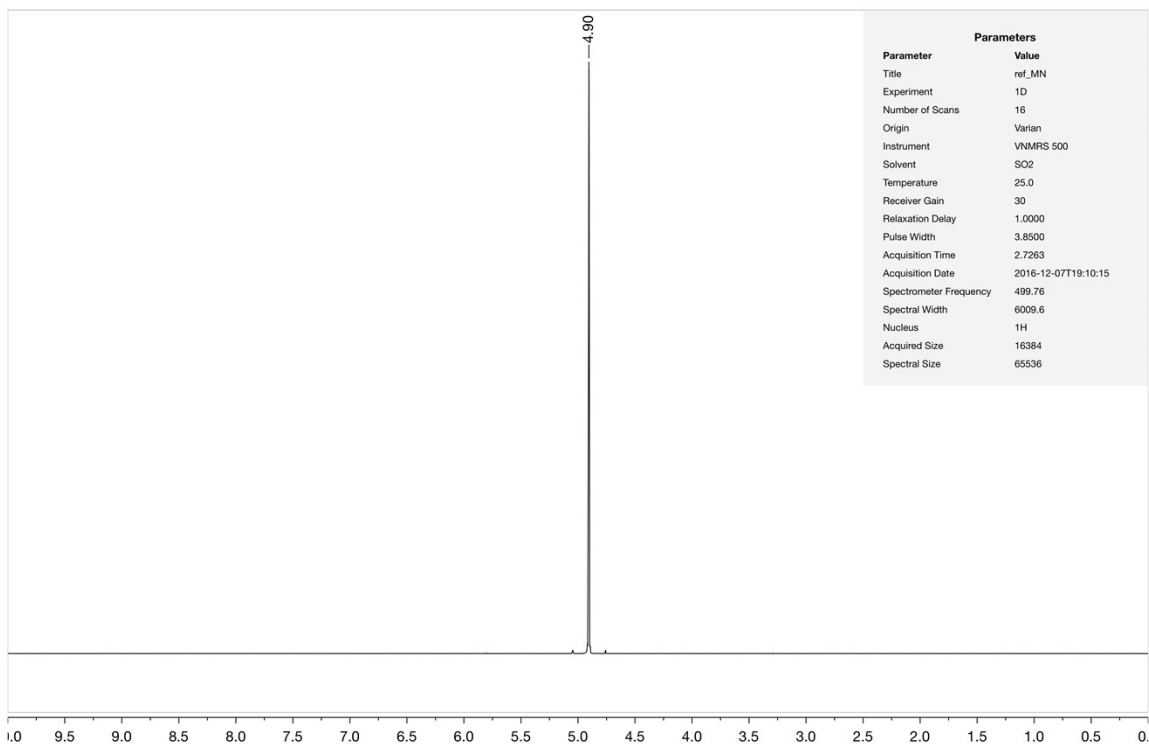<sup>13</sup>C - NCCH<sub>2</sub>CN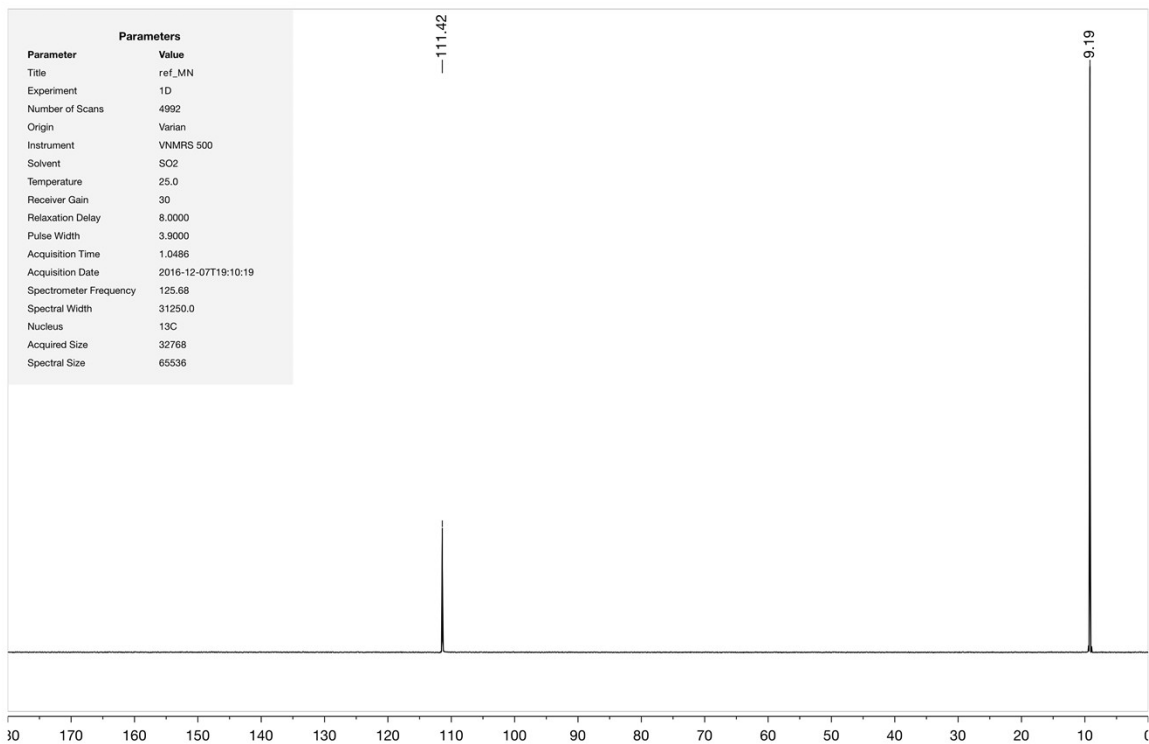



$^{14}\text{N}$  -  $\text{NCCH}_2\text{CN}$ 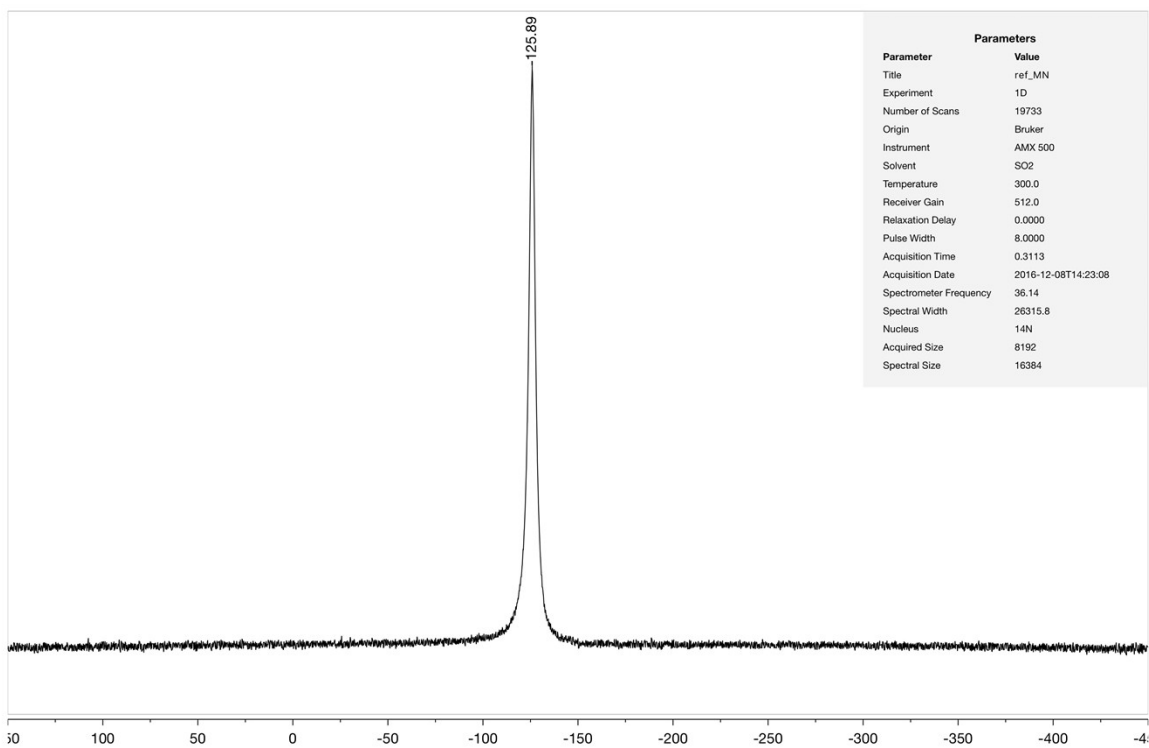

**NCCH<sub>2</sub>CN•AsF<sub>5</sub>**<sup>1</sup>H - NCCH<sub>2</sub>CN•AsF<sub>5</sub>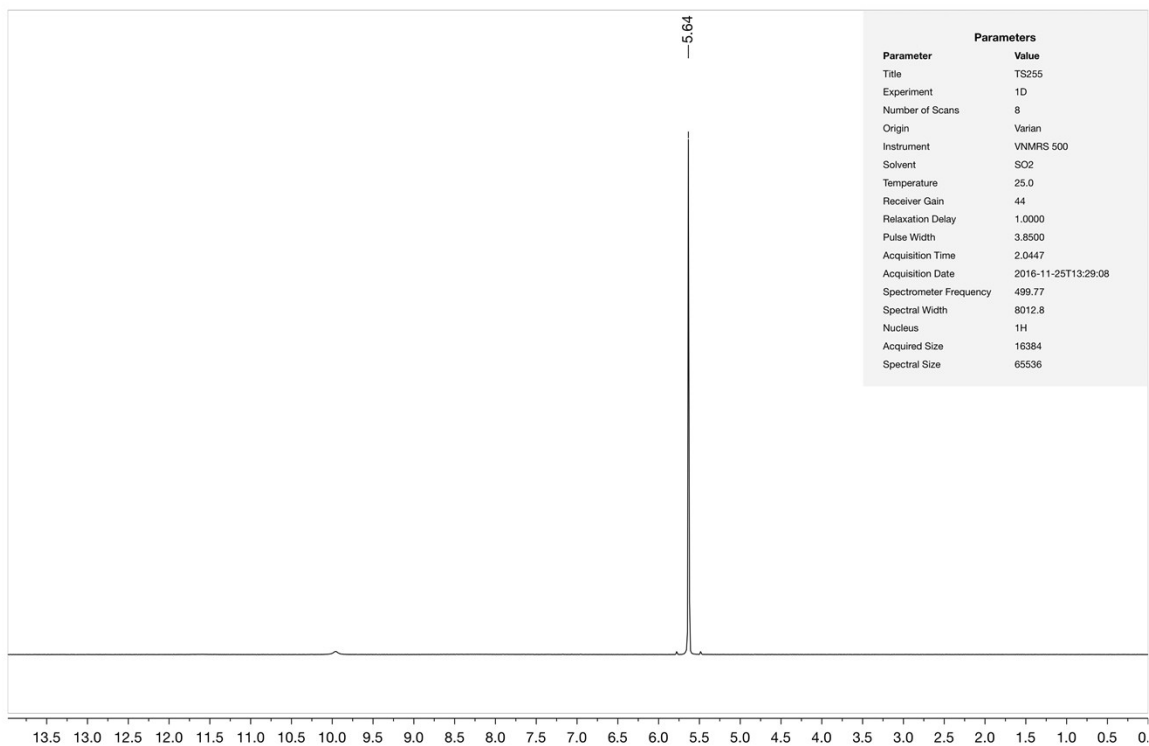<sup>13</sup>C - NCCH<sub>2</sub>CN•AsF<sub>5</sub>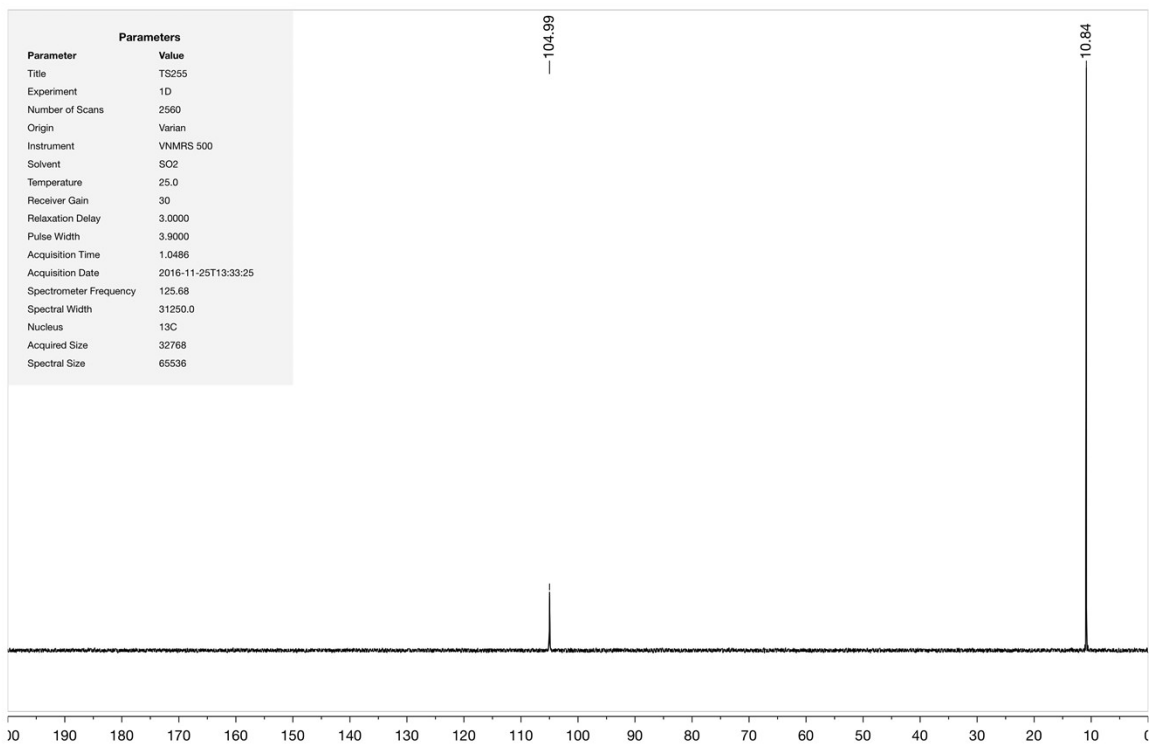

$^{14}\text{N}$  -  $\text{NCCH}_2\text{CN}\cdot\text{AsF}_5$  @ 25°C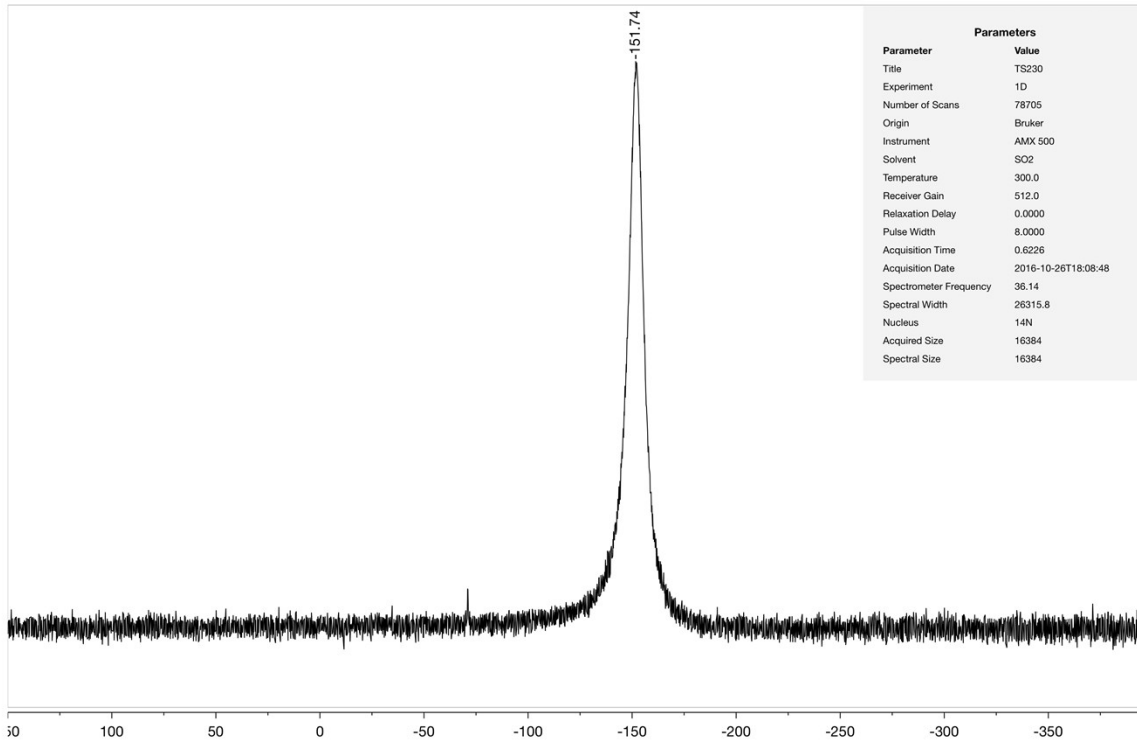 $^{14}\text{N}$  -  $\text{NCCH}_2\text{CN}\cdot\text{AsF}_5$  @ -55°C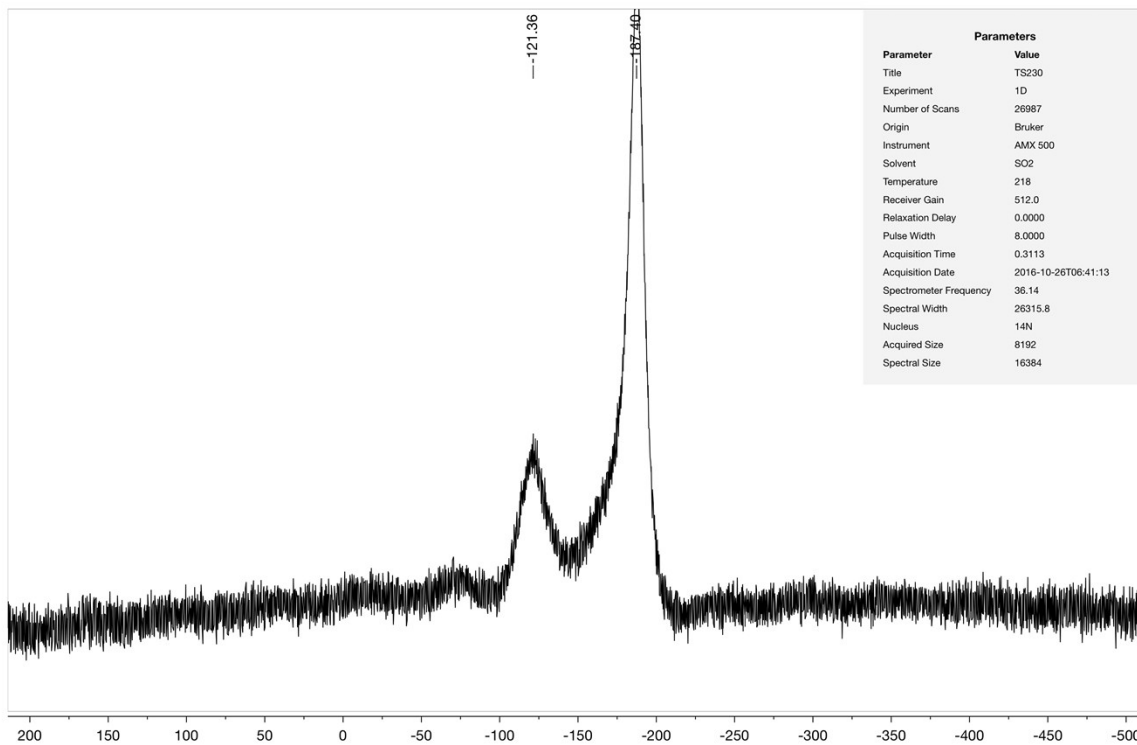

$^{19}\text{F}$  -  $\text{NCCH}_2\text{CN}\cdot\text{AsF}_5$ 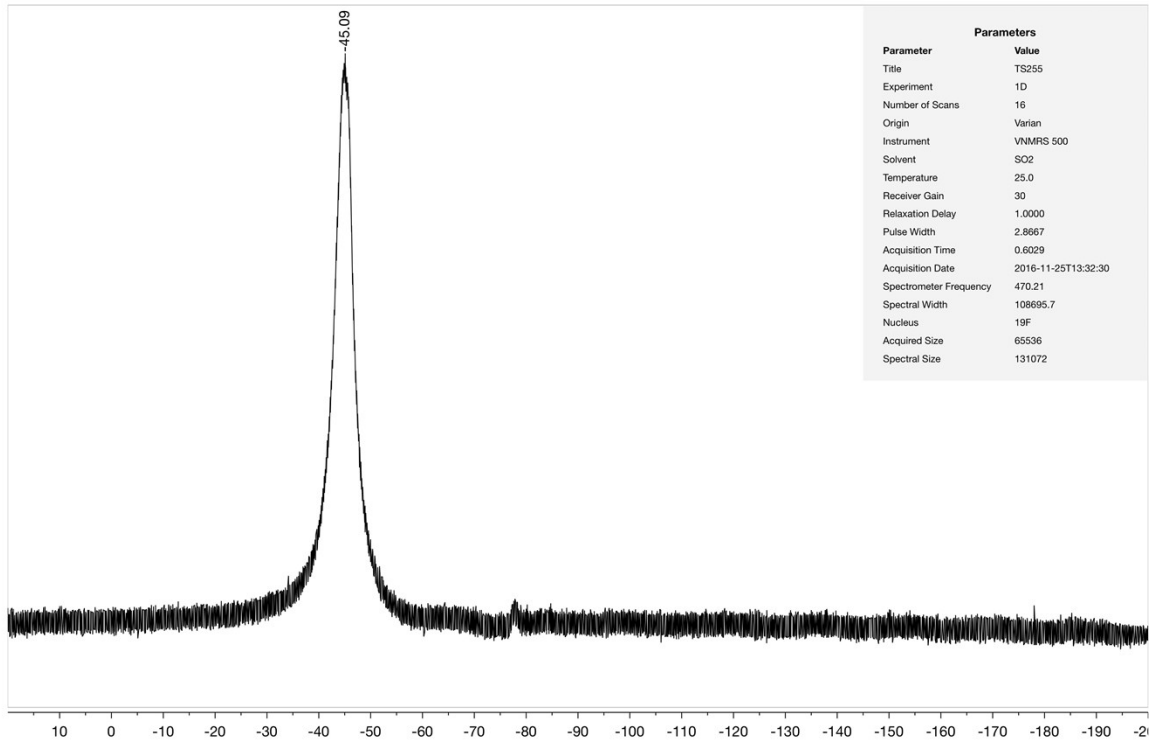

**NCCH<sub>2</sub>CN•SbF<sub>5</sub>**<sup>1</sup>H - NCCH<sub>2</sub>CN•SbF<sub>5</sub>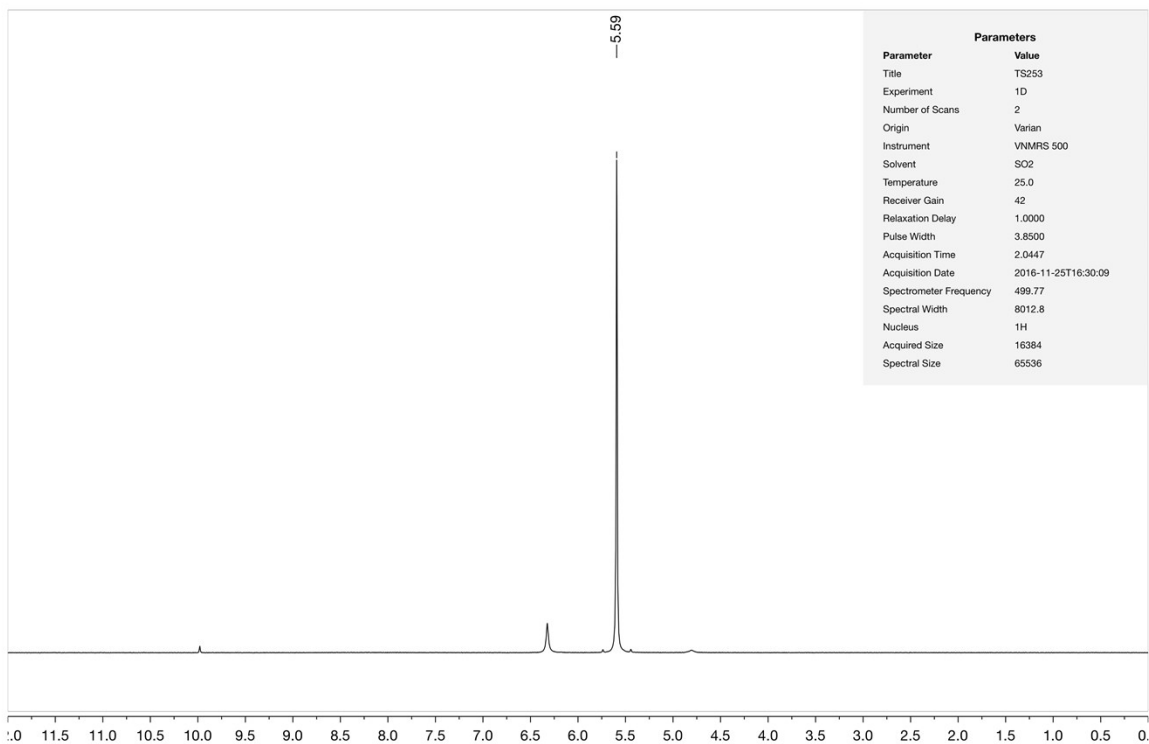<sup>13</sup>C - NCCH<sub>2</sub>CN•SbF<sub>5</sub>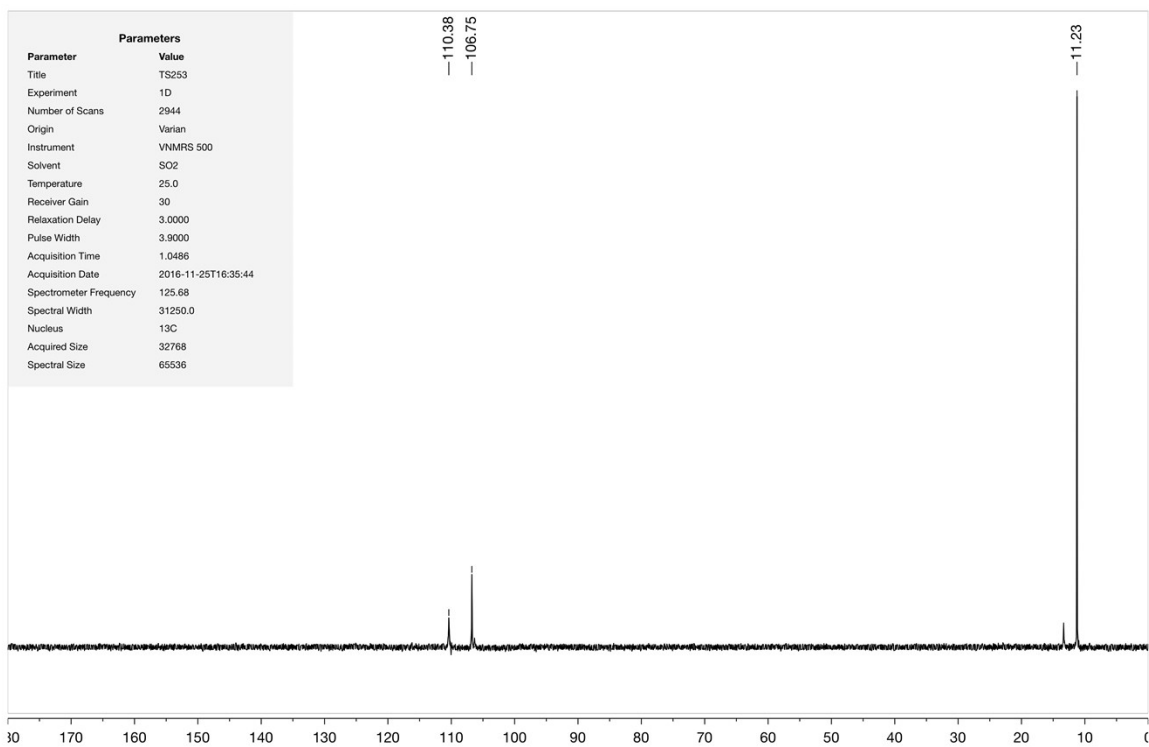

$^{14}\text{N}$  -  $\text{NCCH}_2\text{CN}\cdot\text{SbF}_5$ 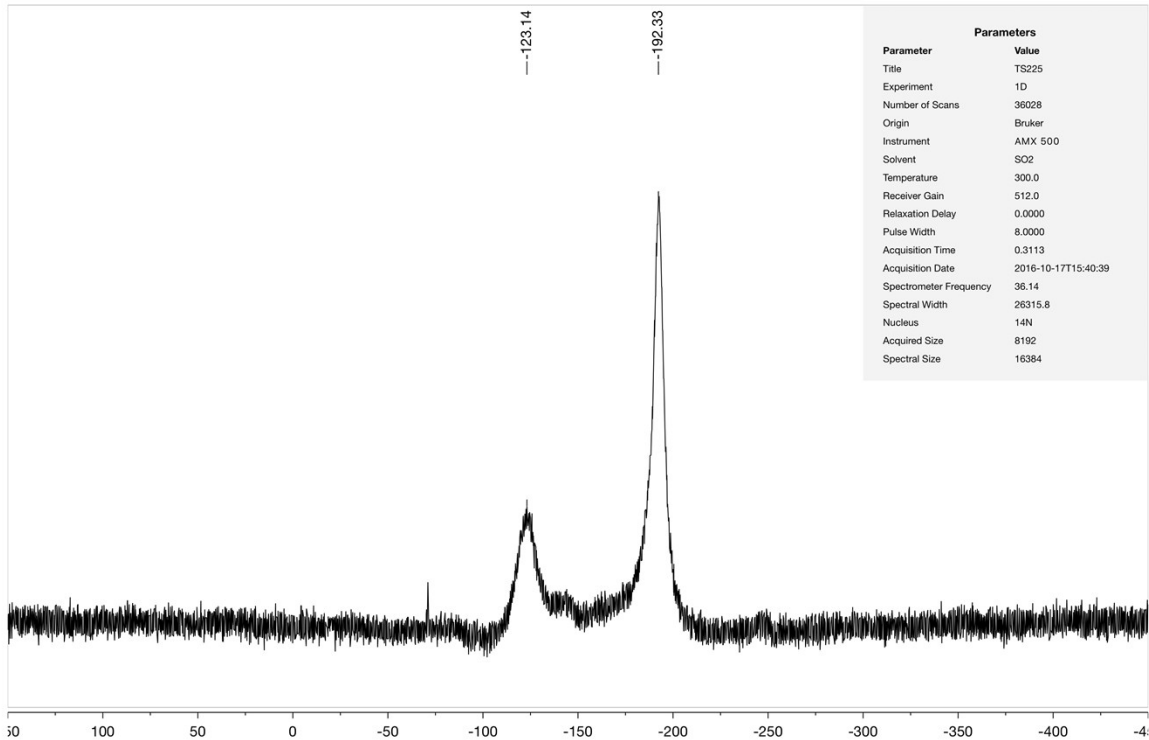 $^{19}\text{F}$  -  $\text{NCCH}_2\text{CN}\cdot\text{SbF}_5$ 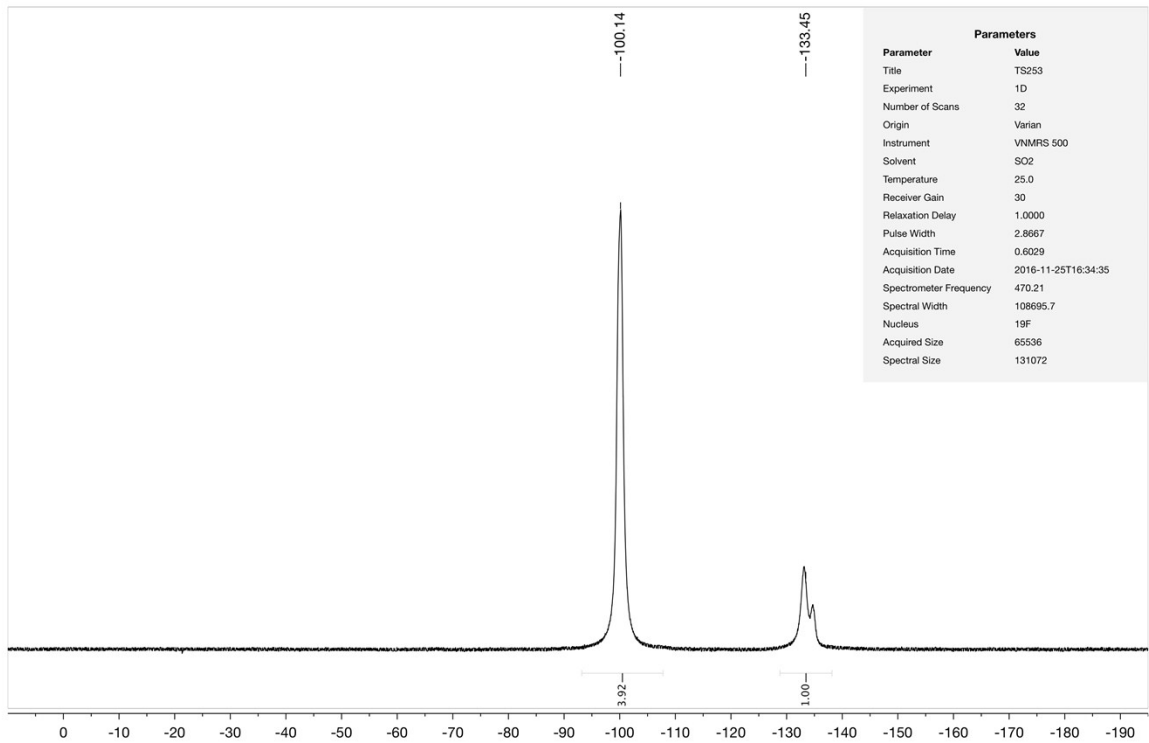

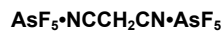 $^1\text{H} - \text{AsF}_5 \cdot \text{NCCH}_2\text{CN} \cdot \text{AsF}_5$ 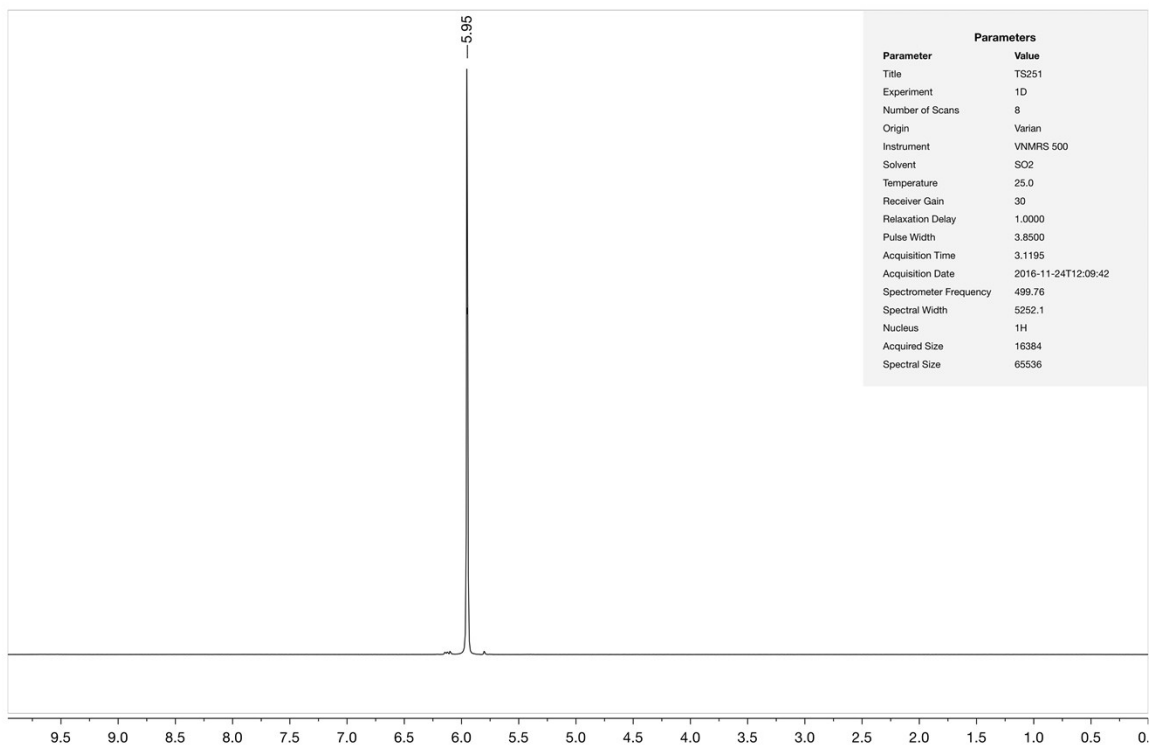 $^{13}\text{C} - \text{AsF}_5 \cdot \text{NCCH}_2\text{CN} \cdot \text{AsF}_5$ 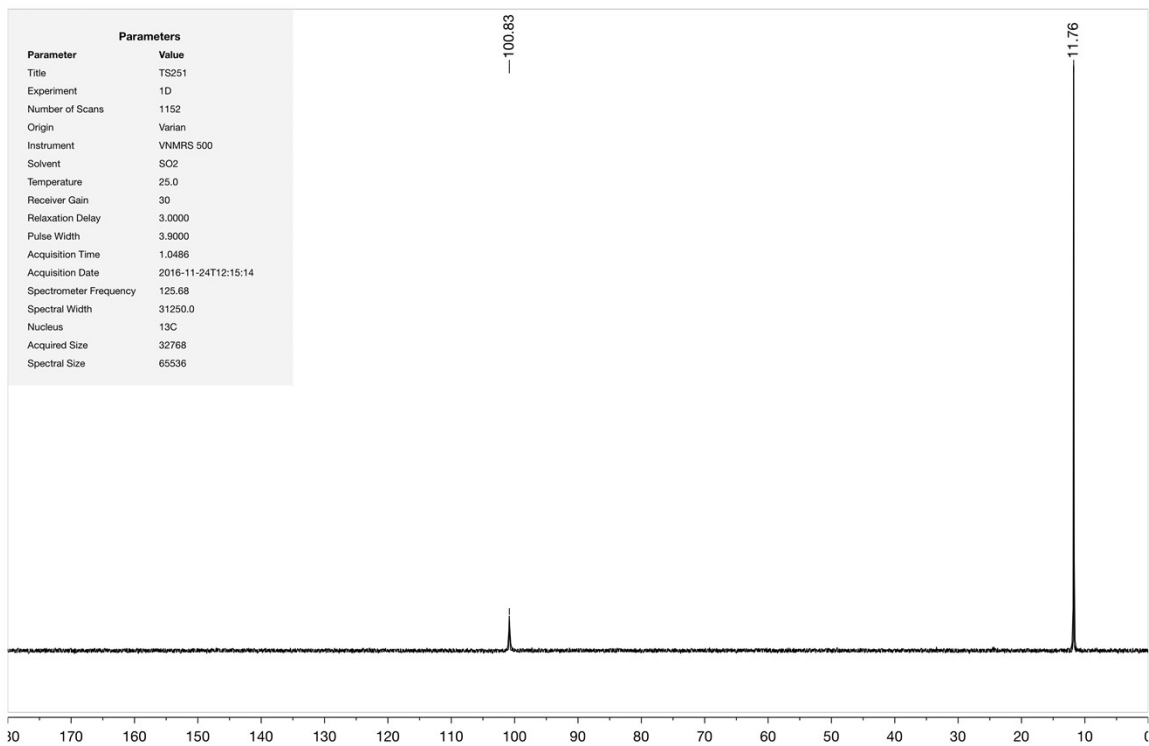

$^{14}\text{N}$  -  $\text{AsF}_5 \cdot \text{NCCH}_2\text{CN} \cdot \text{AsF}_5$ 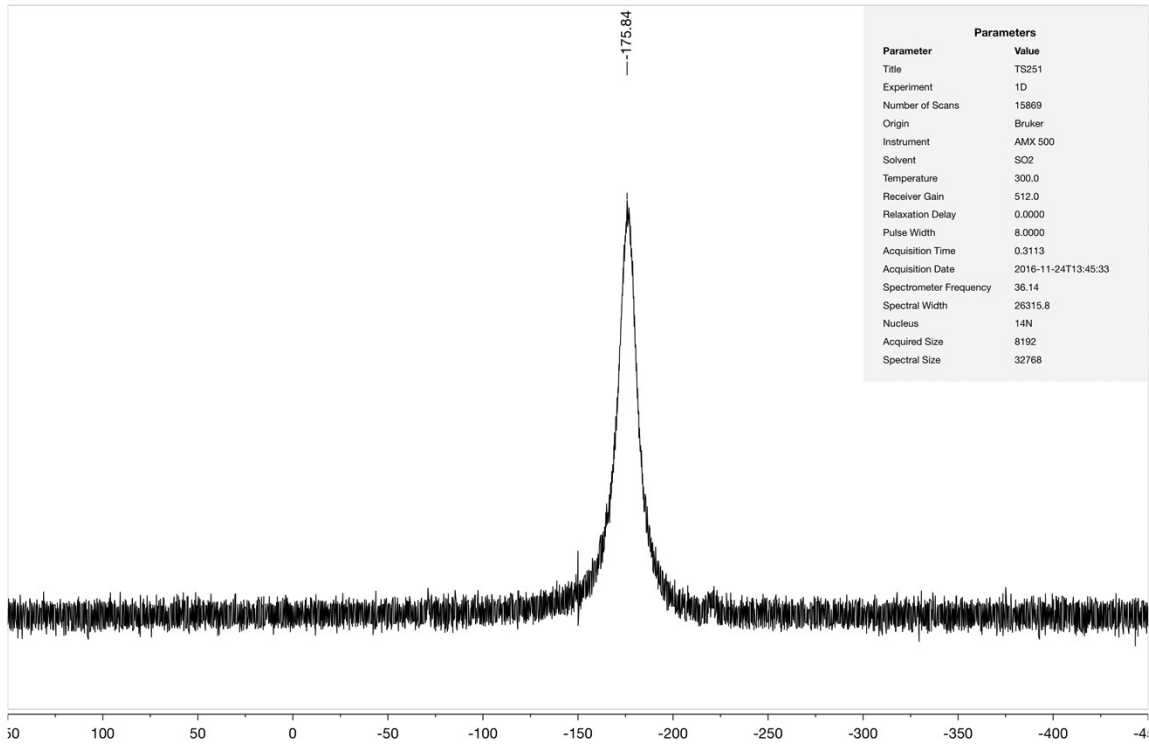 $^{19}\text{F}$  -  $\text{AsF}_5 \cdot \text{NCCH}_2\text{CN} \cdot \text{AsF}_5$ 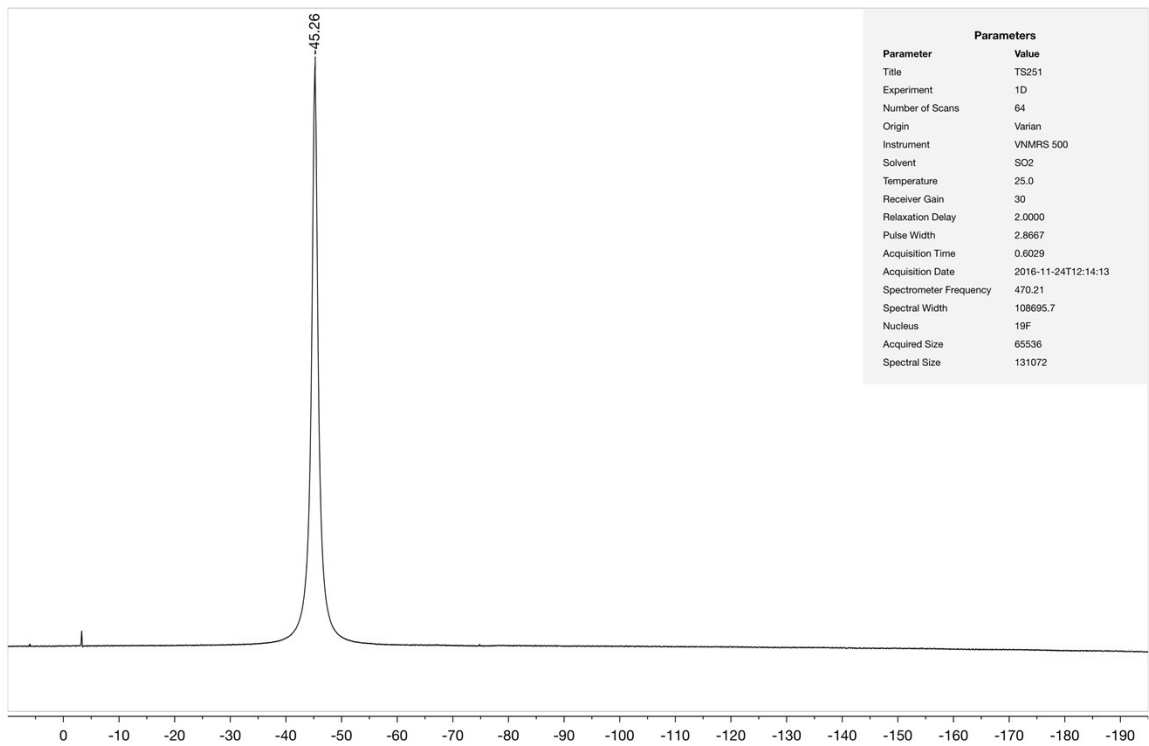



**SbF<sub>5</sub>·NCCH<sub>2</sub>CN·SbF<sub>5</sub>**<sup>1</sup>H - SbF<sub>5</sub>·NCCH<sub>2</sub>CN·SbF<sub>5</sub>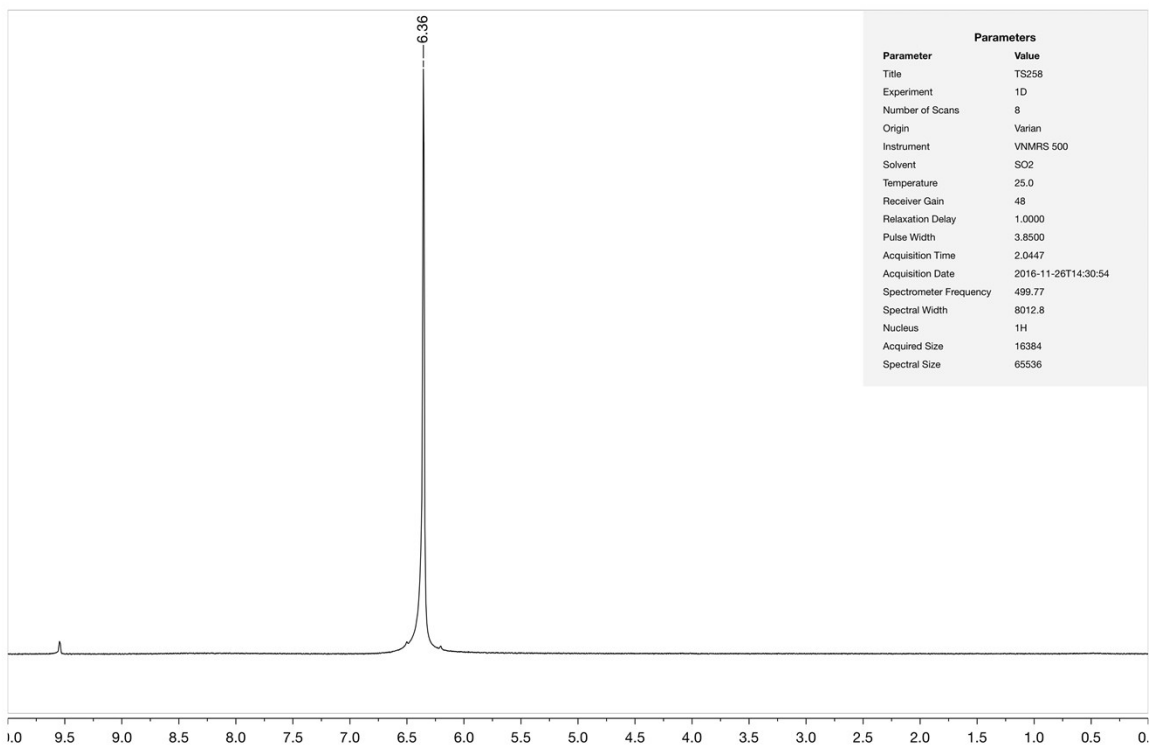<sup>13</sup>C - SbF<sub>5</sub>·NCCH<sub>2</sub>CN·SbF<sub>5</sub>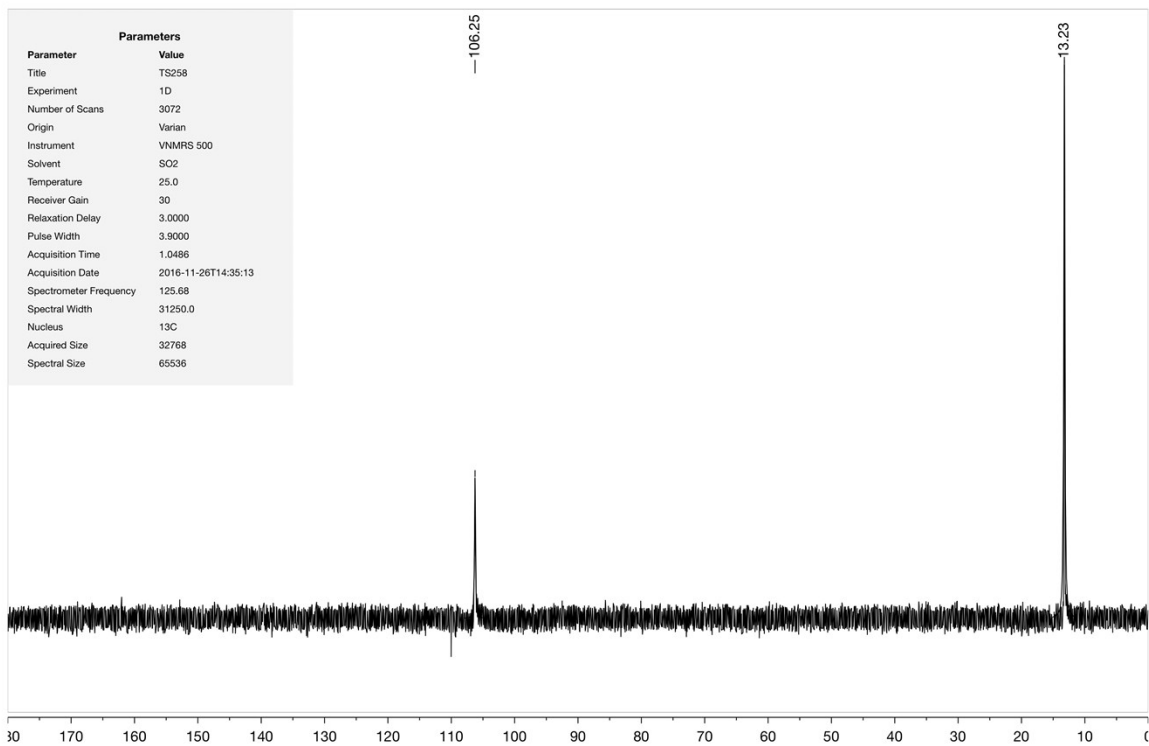

$^{14}\text{N}$  -  $\text{SbF}_5 \cdot \text{NCCH}_2\text{CN} \cdot \text{SbF}_5$ 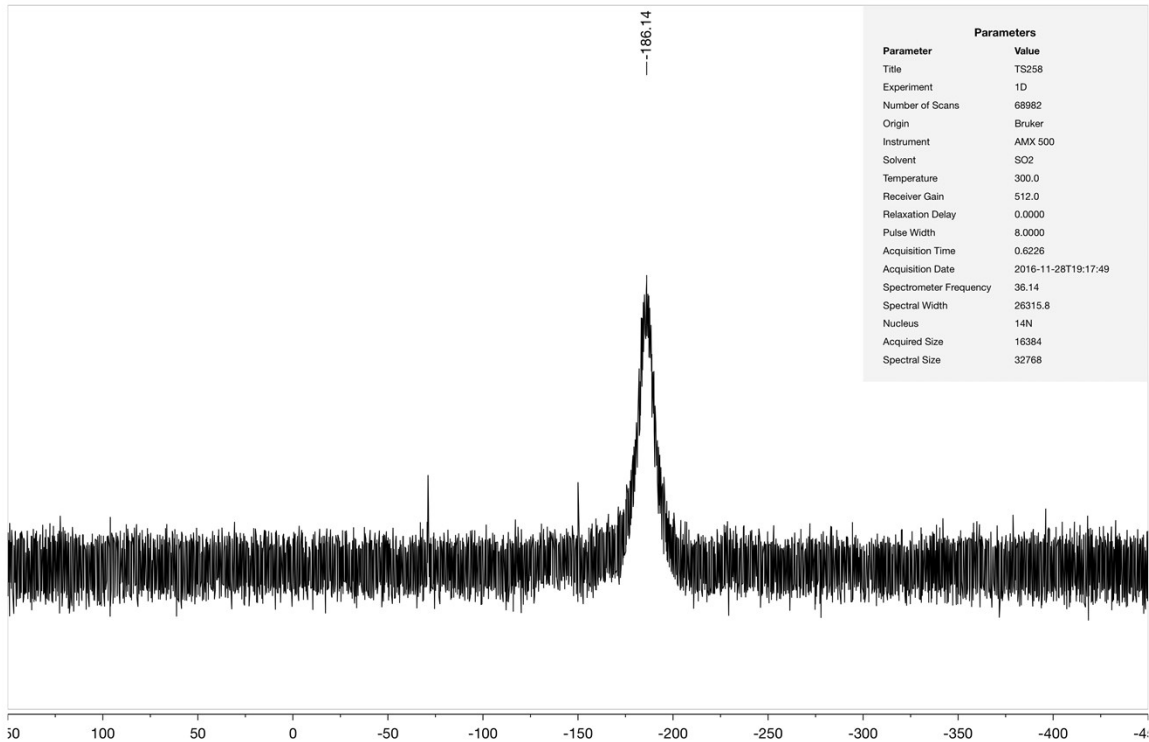 $^{19}\text{F}$  -  $\text{SbF}_5 \cdot \text{NCCH}_2\text{CN} \cdot \text{SbF}_5$ 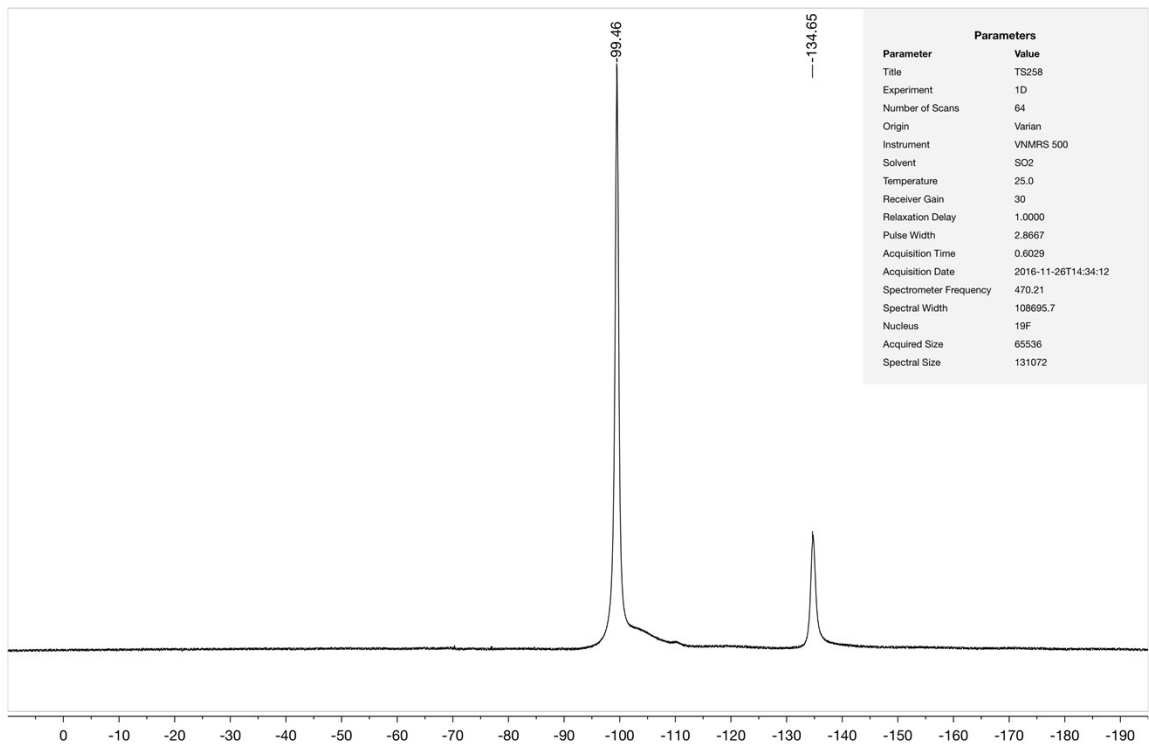

$C_3H_7CN$  $^1H - C_3H_7CN$ 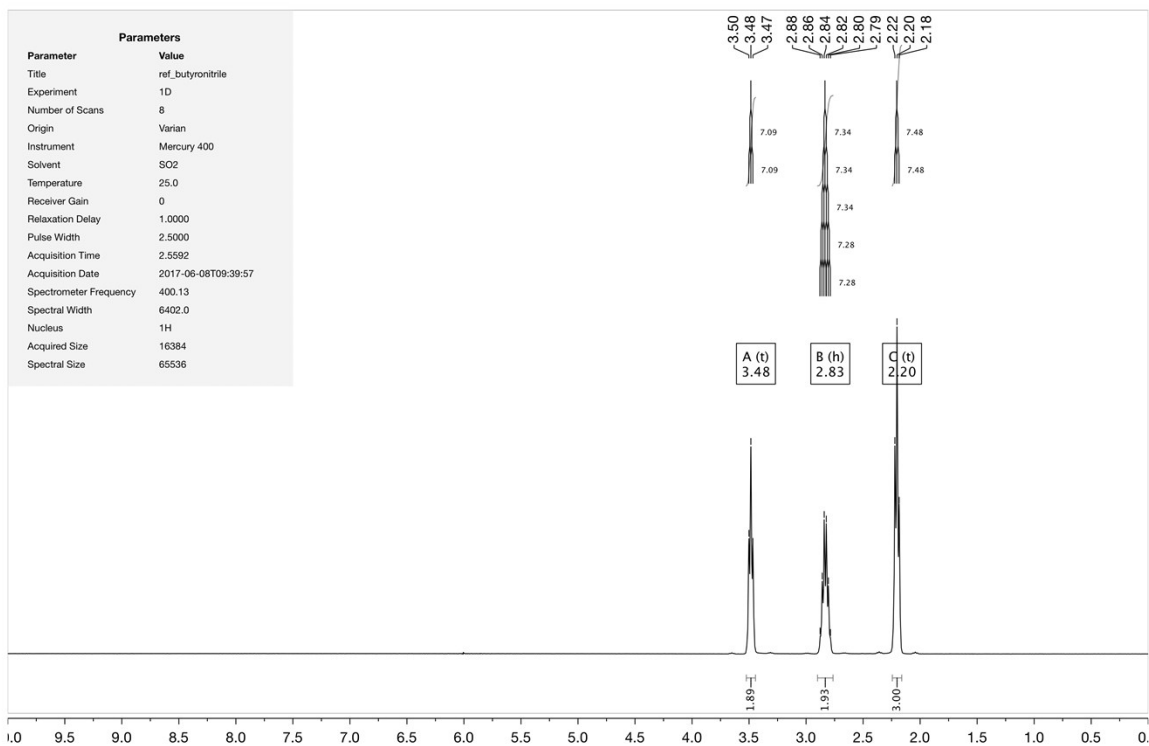 $^{13}C - C_3H_7CN$ 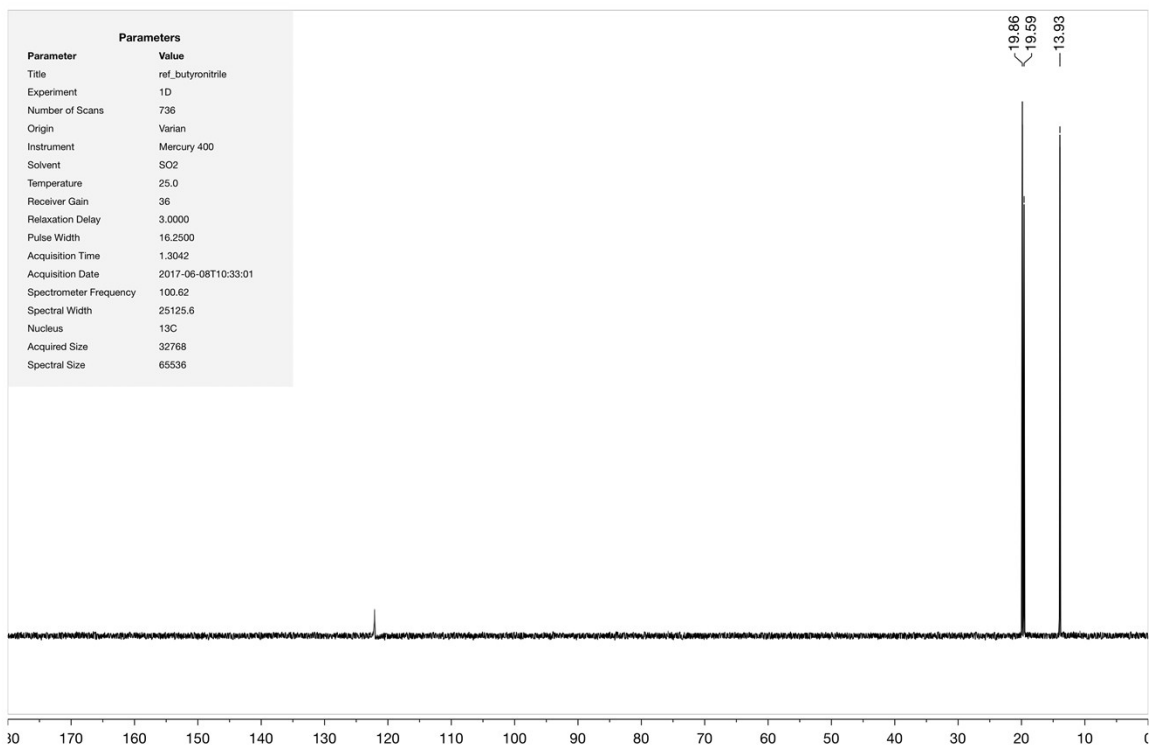

$^{14}\text{N}$  -  $\text{C}_3\text{H}_7\text{CN}$ 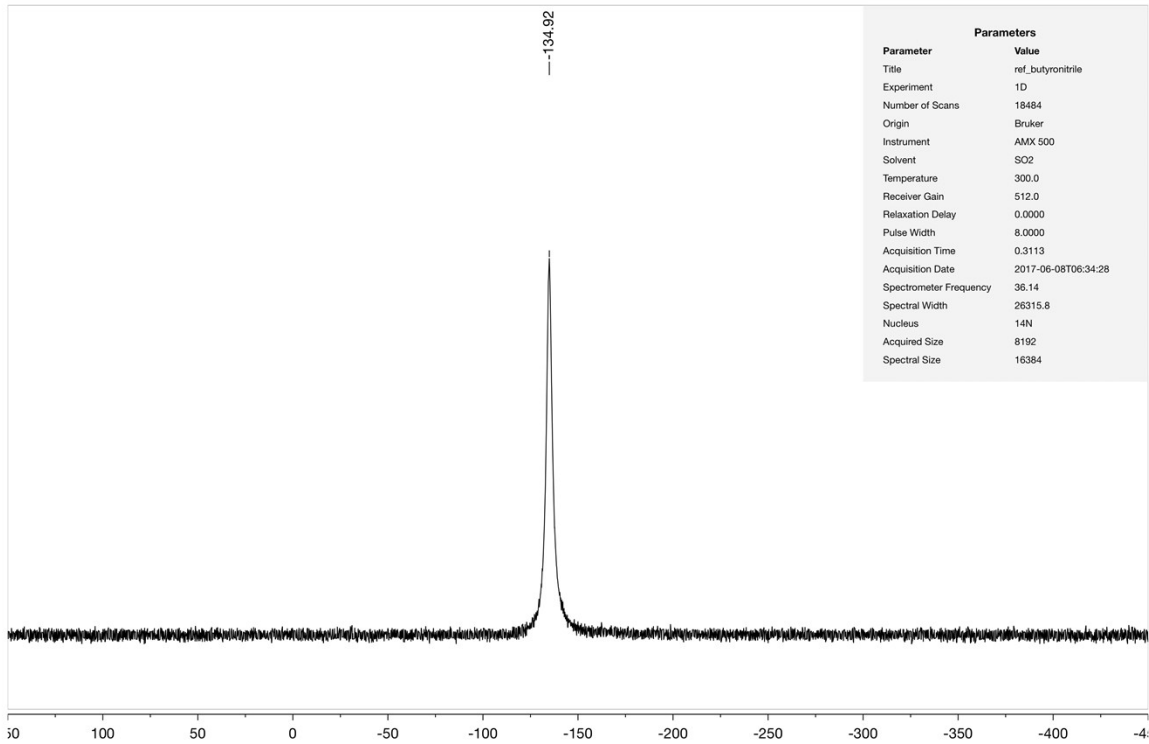

$C_3H_7CN \cdot AsF_5$  $^1H - C_3H_7CN \cdot AsF_5$ 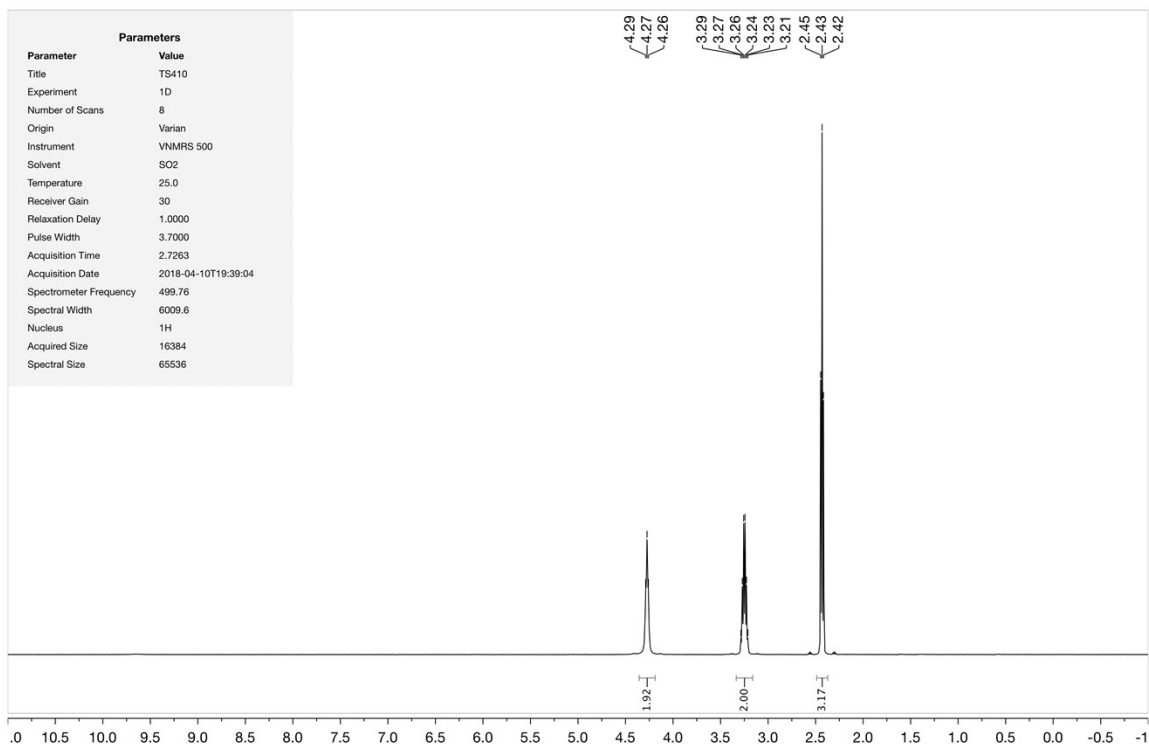 $^{13}C - C_3H_7CN \cdot AsF_5$ 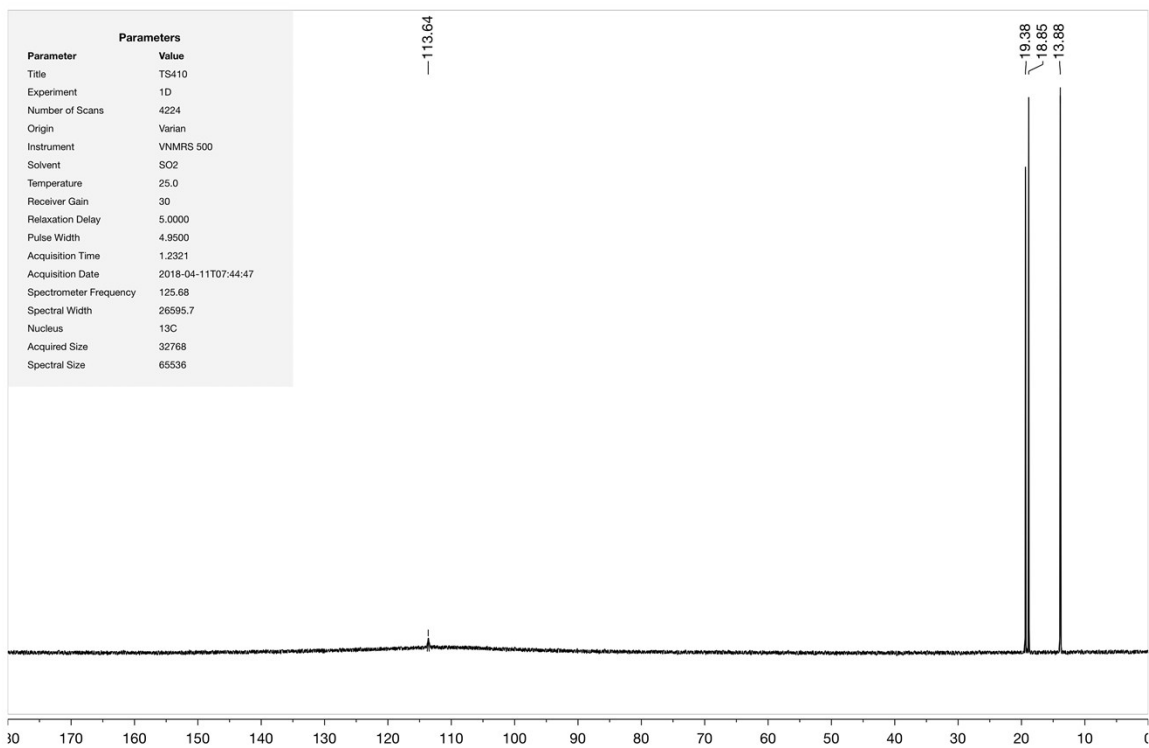

$^{14}\text{N}$  -  $\text{C}_3\text{H}_7\text{CN}\cdot\text{AsF}_5$ 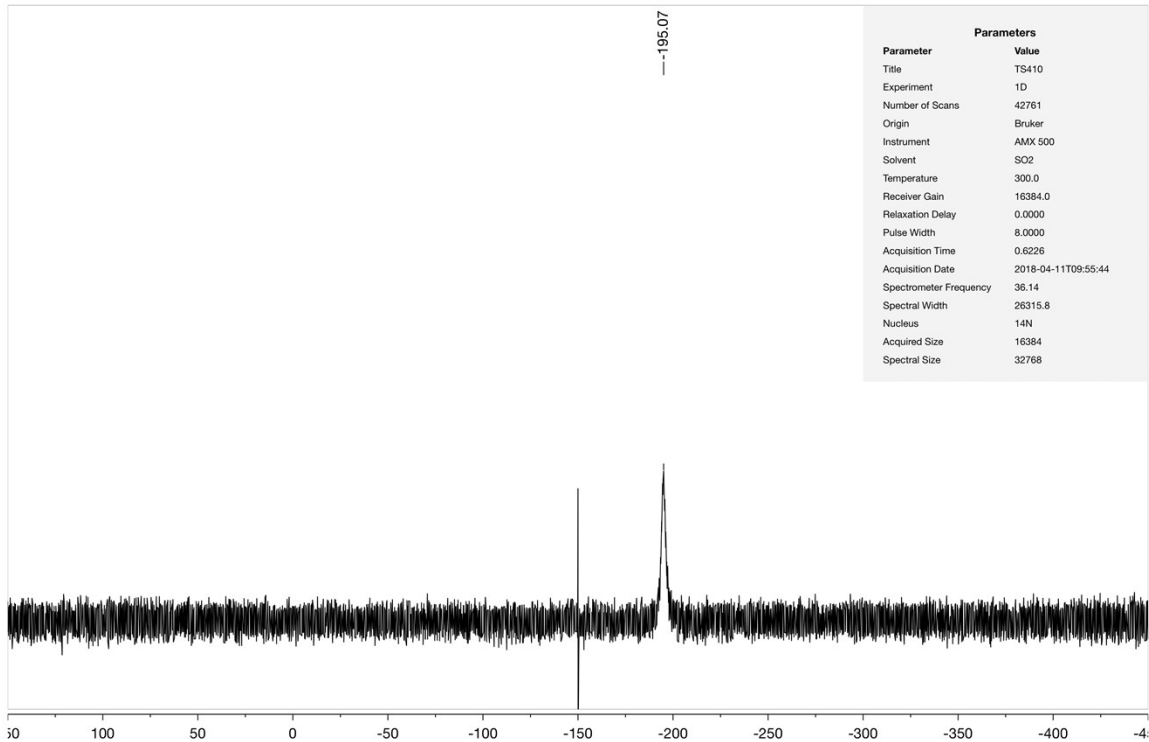 $^{19}\text{F}$  -  $\text{C}_3\text{H}_7\text{CN}\cdot\text{AsF}_5$ 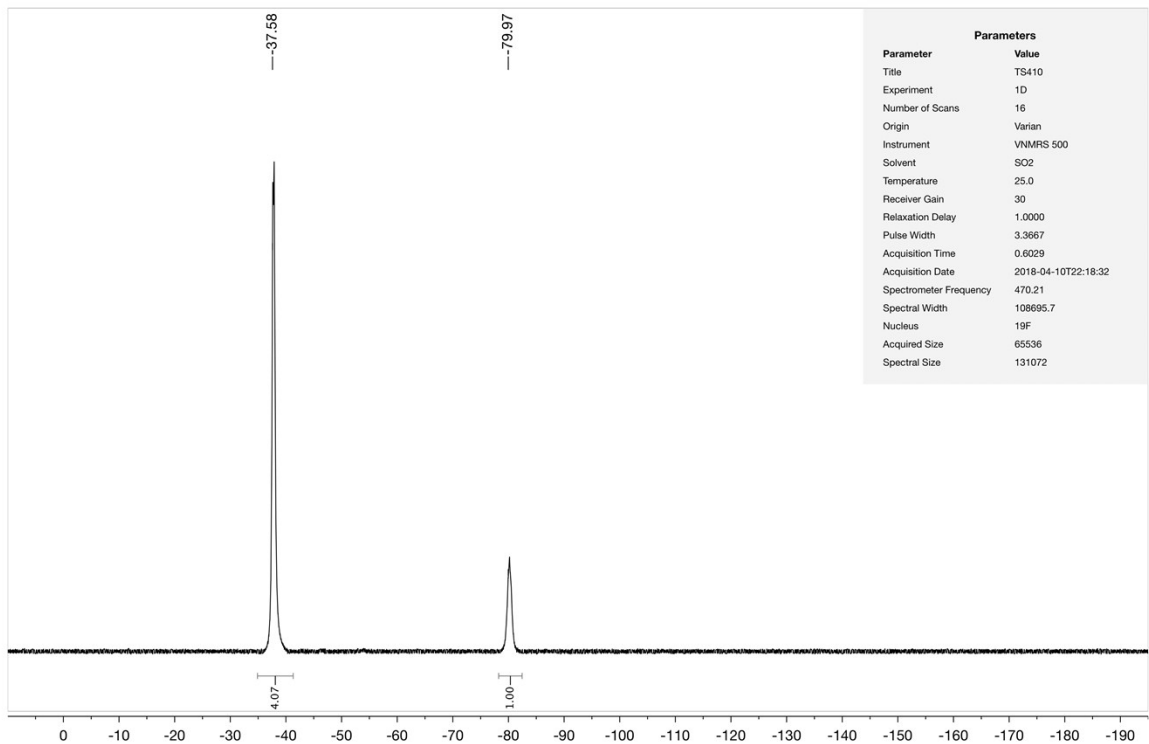

$^1\text{H}$ - $^1\text{H}$  COSY -  $\text{C}_3\text{H}_7\text{CN}\cdot\text{AsF}_5$ 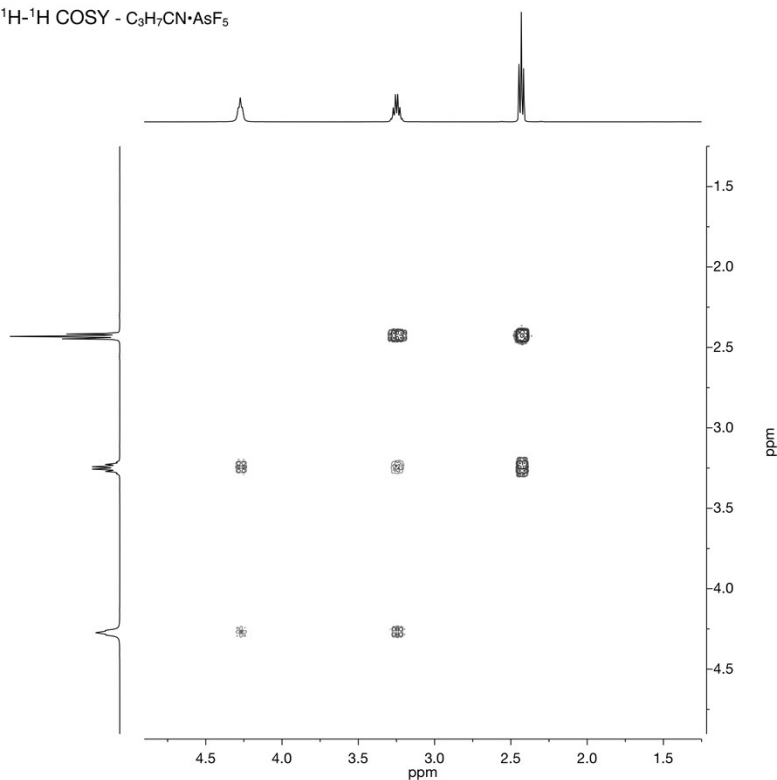

| Parameters             |                     |
|------------------------|---------------------|
| Parameter              | Value               |
| Title                  | TS410               |
| Experiment             | COSY                |
| Number of Scans        | 8                   |
| Origin                 | Varian              |
| Instrument             | VNMRS 500           |
| Solvent                | SO2                 |
| Temperature            | 25.0                |
| Pulse Sequence         | gCOSY               |
| Receiver Gain          | 30                  |
| Relaxation Delay       | 1.0000              |
| Pulse Width            | 7.4000              |
| Acquisition Time       | 0.1500              |
| Acquisition Date       | 2018-04-10T23:02:58 |
| Nucleus                | (1H, 1H)            |
| Spectrometer Frequency | (499.76, 499.76)    |
| Spectral Width         | (1899.7, 1899.7)    |
| Lowest Frequency       | (550.8, 550.8)      |
| Acquired Size          | (285, 256)          |
| Spectral Size          | (512, 512)          |

 $^1\text{H}$ - $^{13}\text{C}$  HSQC -  $\text{C}_3\text{H}_7\text{CN}\cdot\text{AsF}_5$ 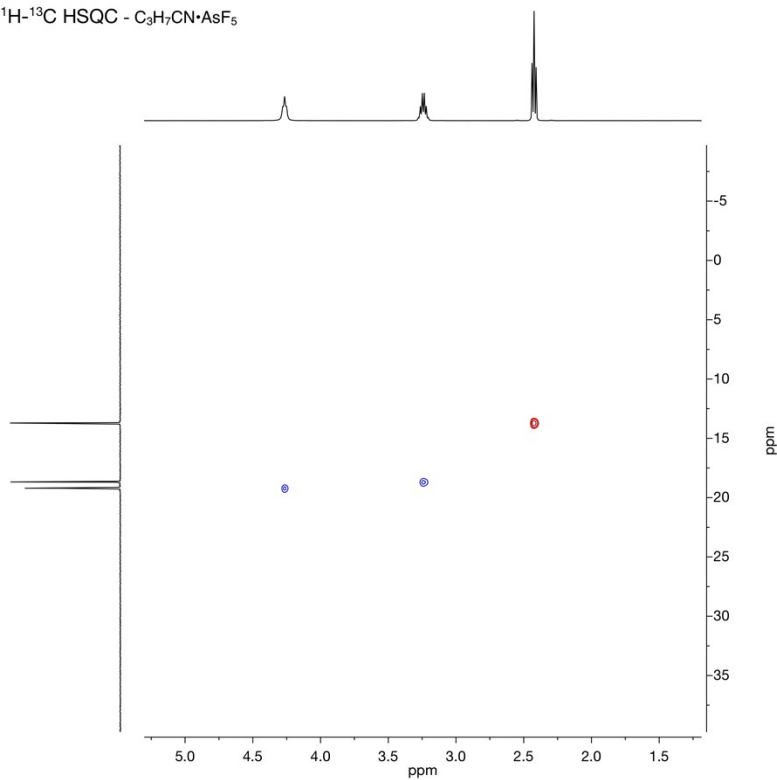

| Parameters             |                     |
|------------------------|---------------------|
| Parameter              | Value               |
| Title                  | TS410               |
| Experiment             | HSQC                |
| Number of Scans        | 8                   |
| Origin                 | Varian              |
| Instrument             | VNMRS 500           |
| Solvent                | SO2                 |
| Temperature            | 25.0                |
| Pulse Sequence         | gHSQCAD             |
| Receiver Gain          | 30                  |
| Relaxation Delay       | 1.0000              |
| Pulse Width            | 7.4000              |
| Acquisition Time       | 0.1499              |
| Acquisition Date       | 2018-04-11T00:25:43 |
| Nucleus                | (1H, 13C)           |
| Spectrometer Frequency | (499.76, 125.68)    |
| Spectral Width         | (6009.6, 25133.5)   |
| Lowest Frequency       | (-506.0, -1256.9)   |
| Acquired Size          | (901, 256)          |
| Spectral Size          | (1024, 1024)        |

$C_3H_7CN \cdot SbF_5$  $^1H - C_3H_7CN \cdot SbF_5$ 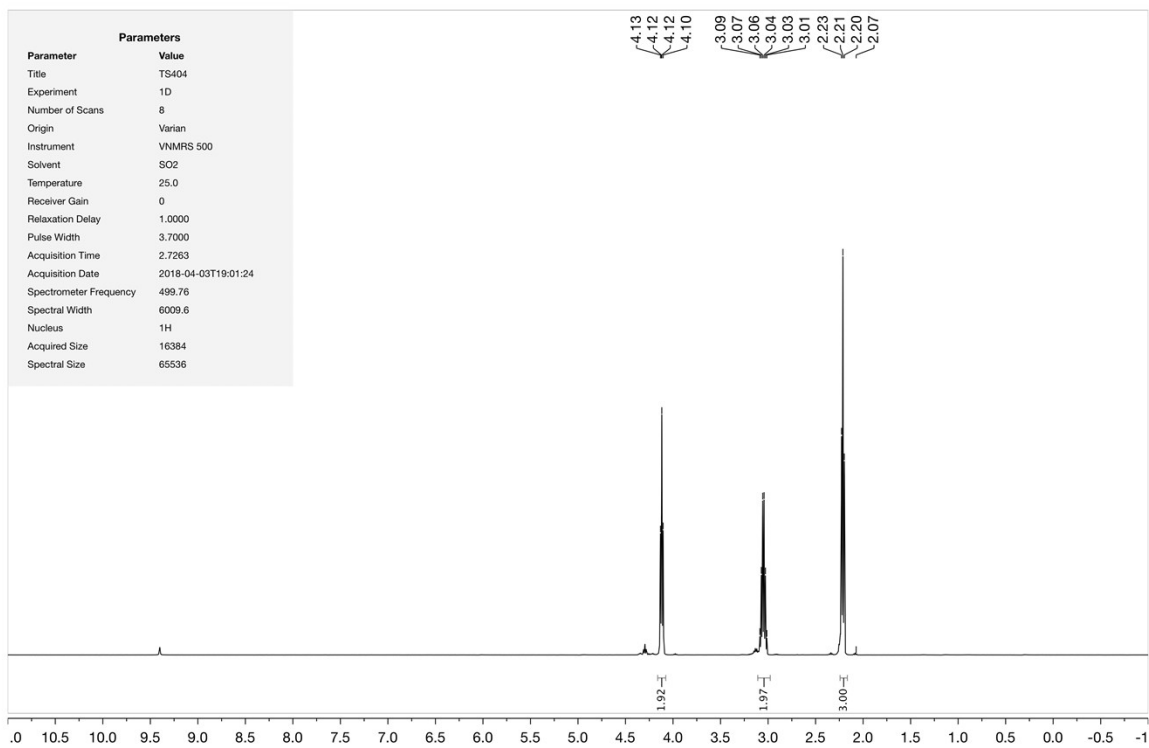 $^{13}C - C_3H_7CN \cdot SbF_5$ 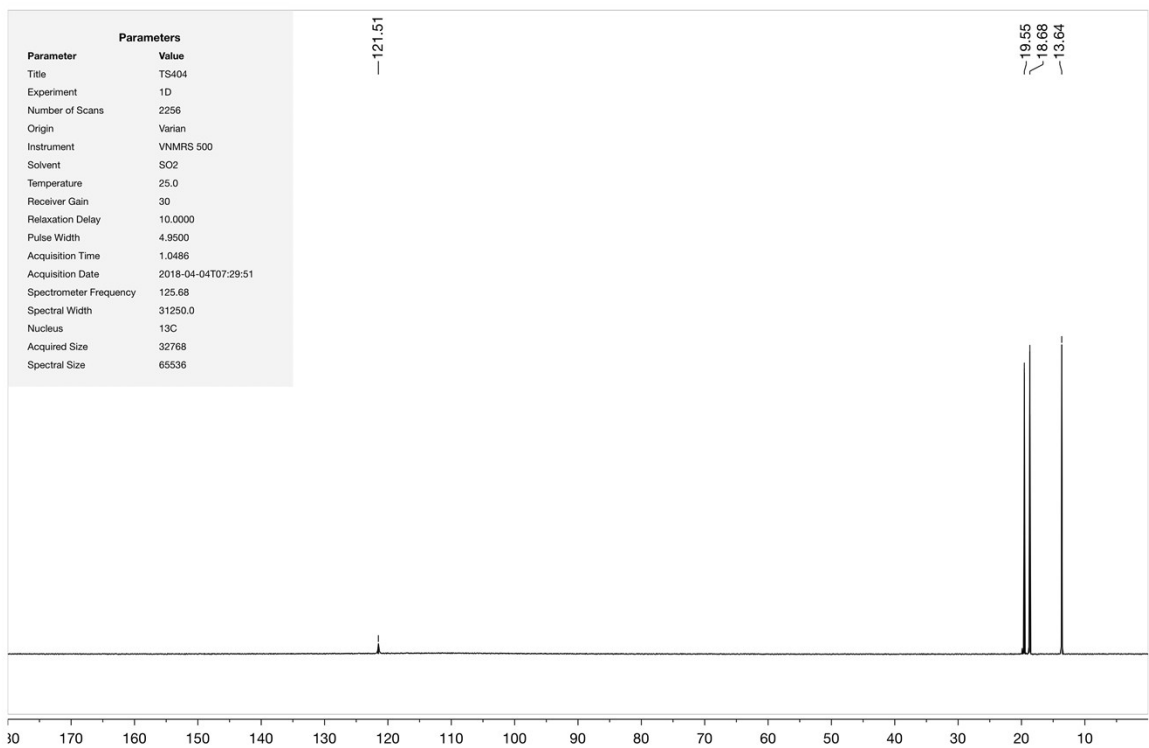



$^{14}\text{N}$  -  $\text{C}_3\text{H}_7\text{CN}\cdot\text{SbF}_6$ 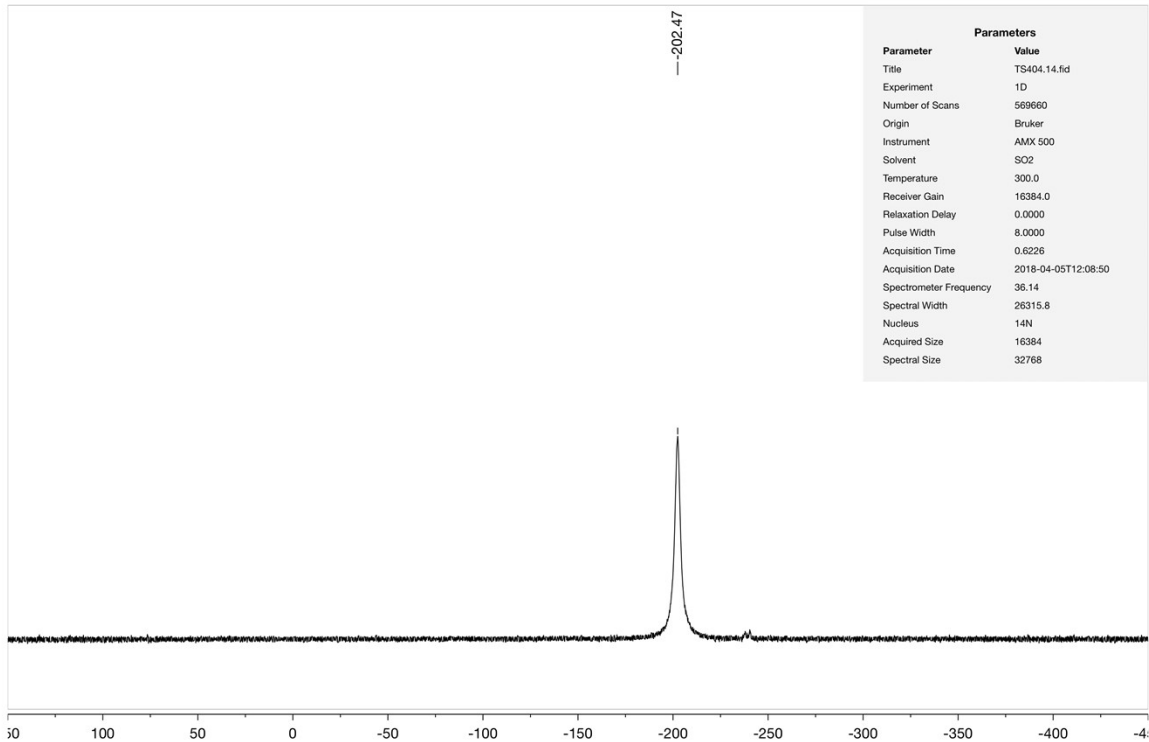 $^{19}\text{F}$  -  $\text{C}_3\text{H}_7\text{CN}\cdot\text{SbF}_6$ 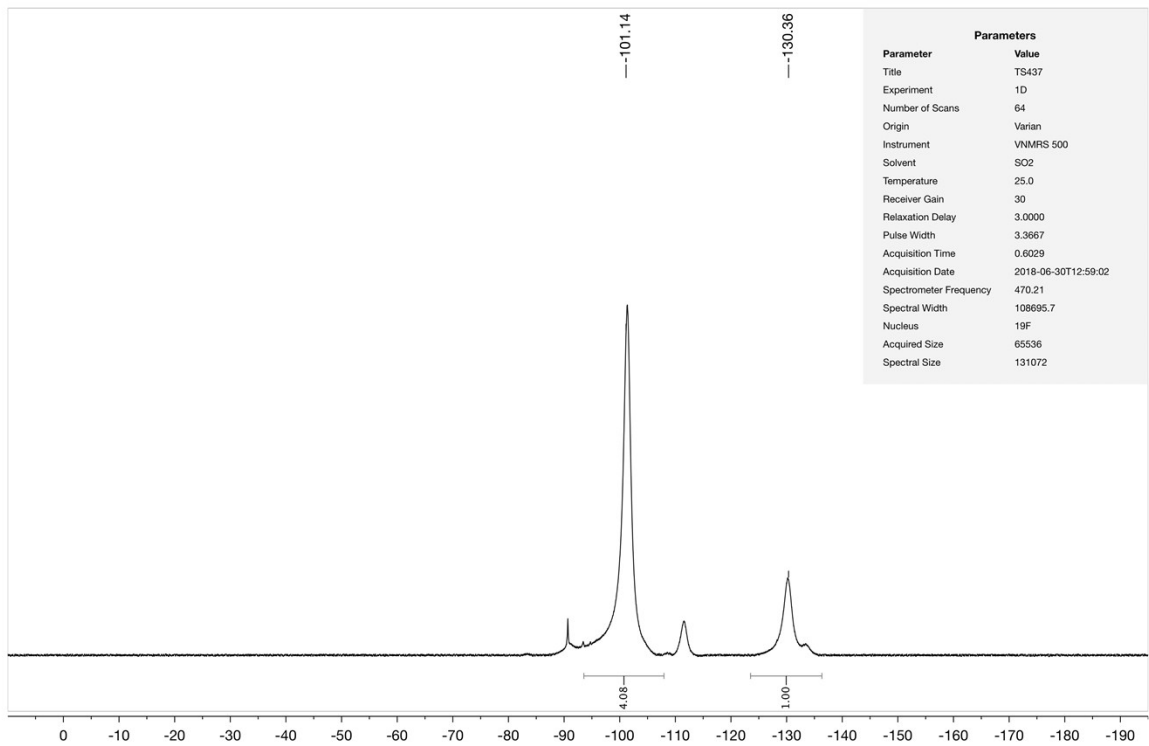

cyclo-C<sub>3</sub>H<sub>5</sub>CN<sup>1</sup>H - c-C<sub>3</sub>H<sub>5</sub>CCN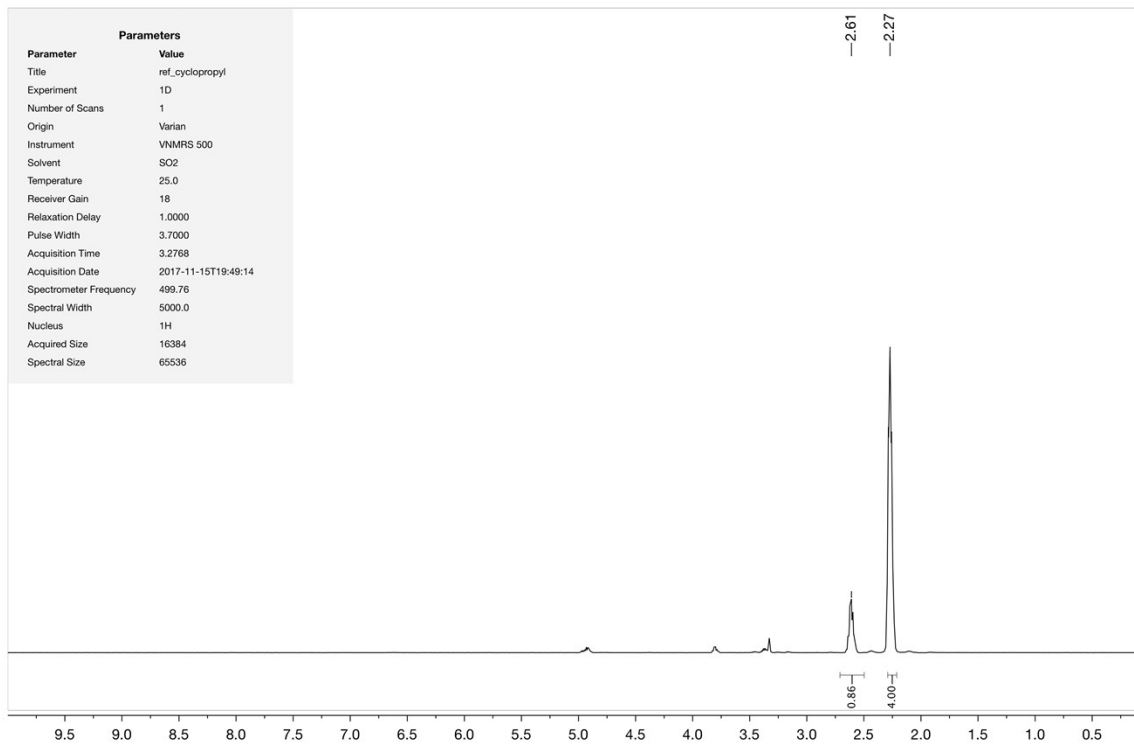<sup>13</sup>C - c-C<sub>3</sub>H<sub>5</sub>CCN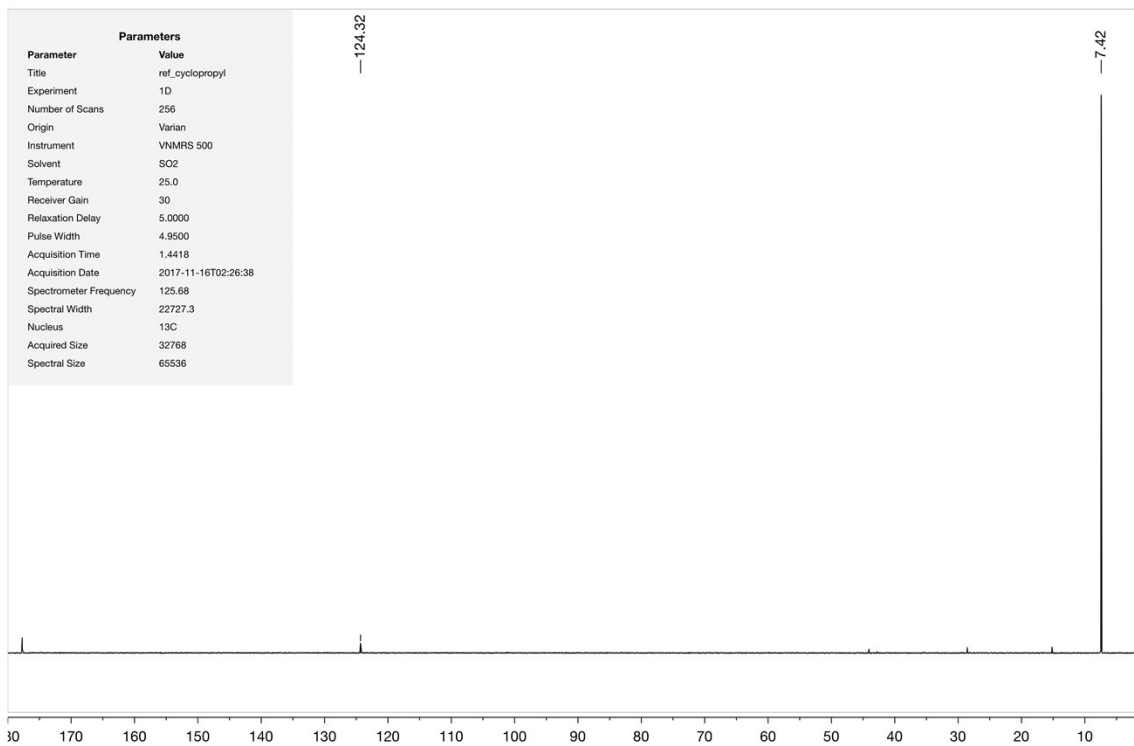

$^{14}\text{N}$  -  $\alpha\text{-C}_3\text{H}_5\text{CCN}$ 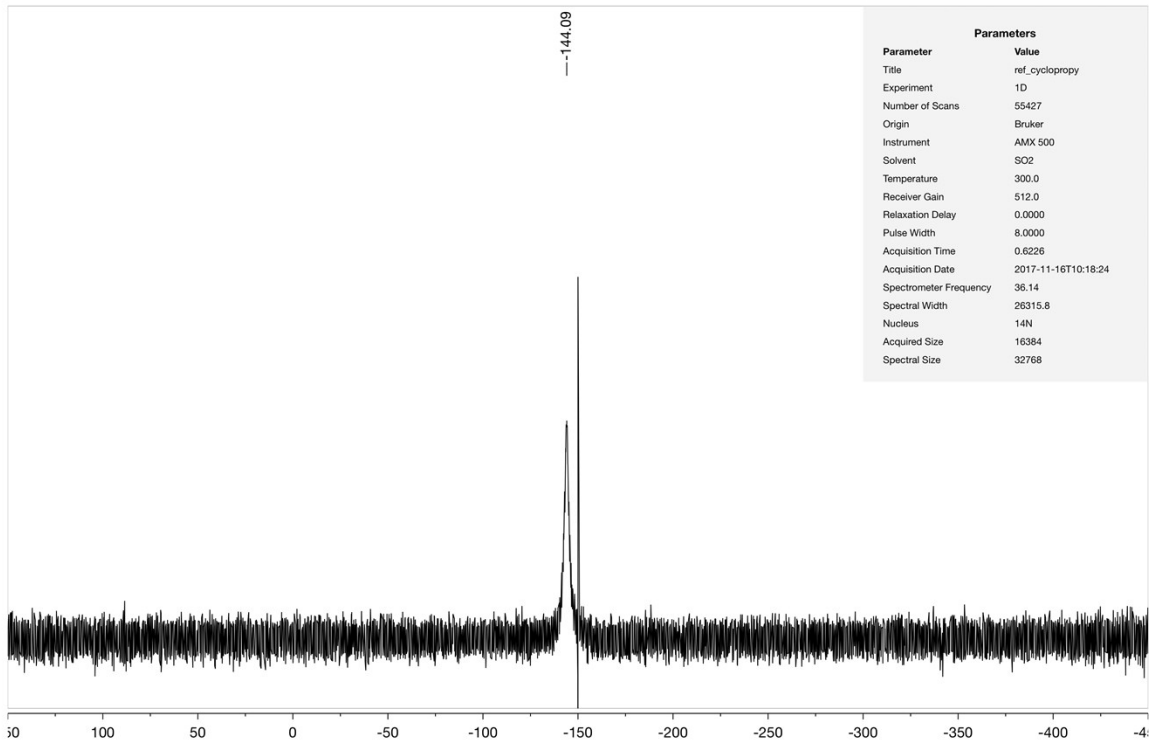

cyclo-C<sub>3</sub>H<sub>5</sub>CN•AsF<sub>5</sub><sup>1</sup>H - c-C<sub>3</sub>H<sub>5</sub>CN•AsF<sub>5</sub>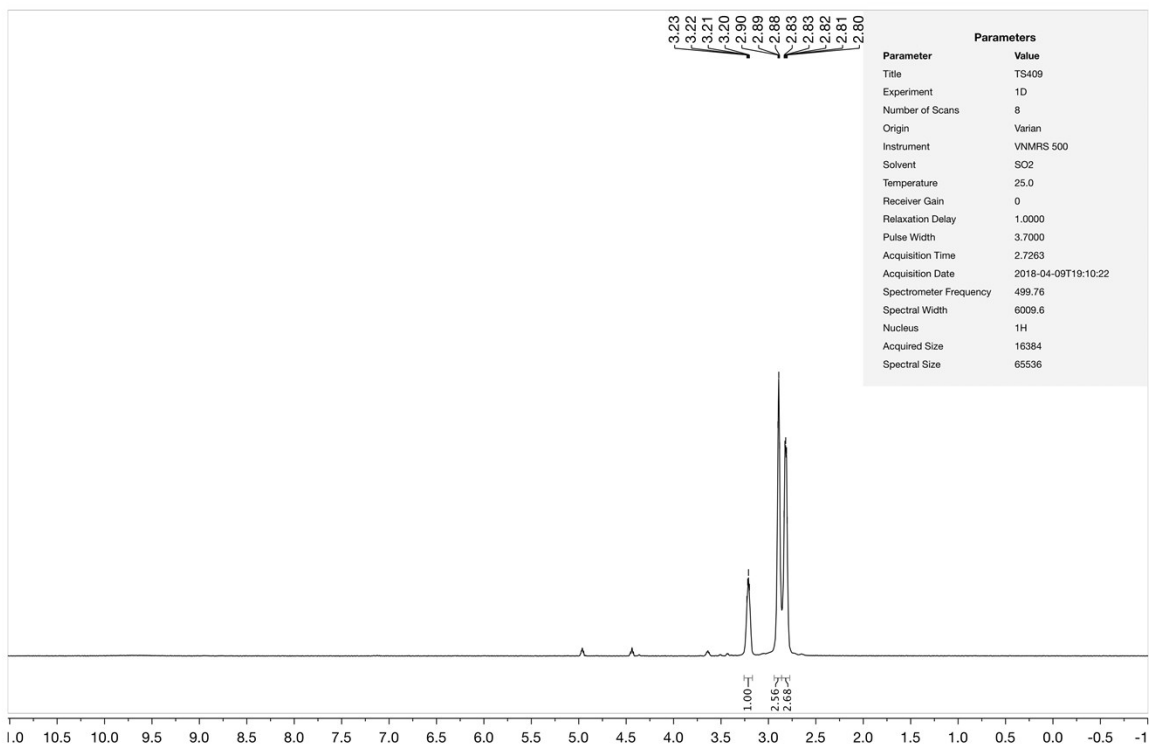<sup>13</sup>C - c-C<sub>3</sub>H<sub>5</sub>CN•AsF<sub>5</sub>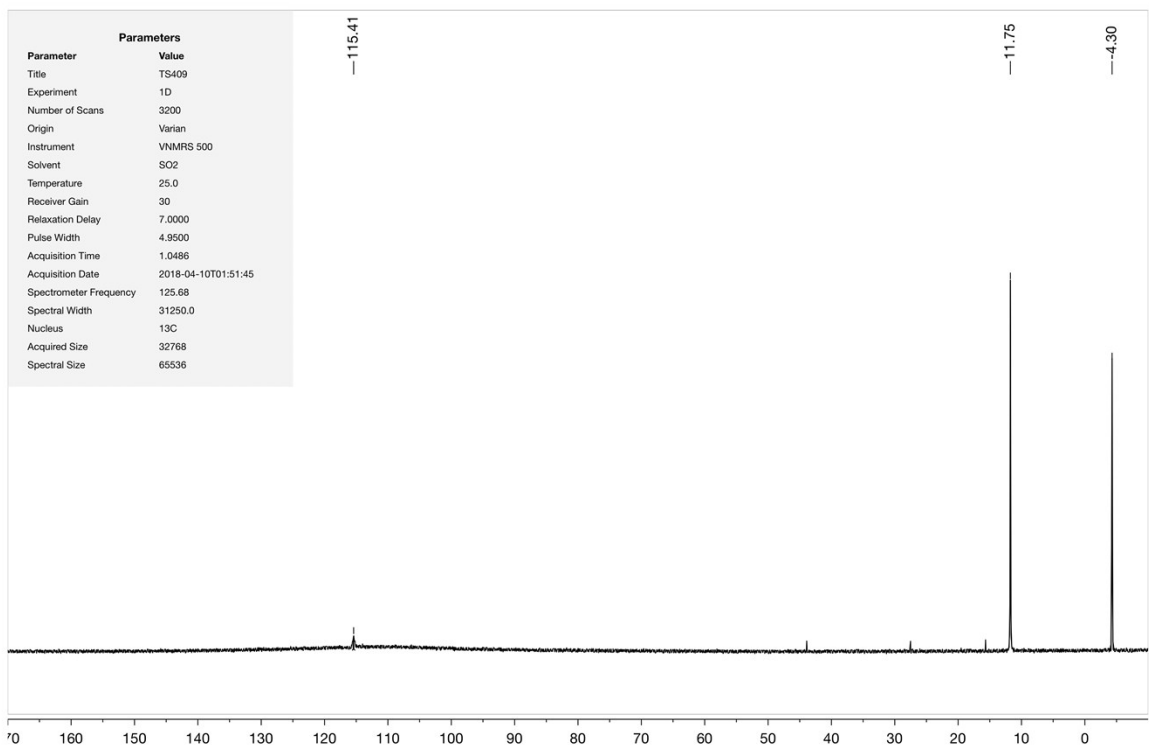

$^{14}\text{N}$  -  $c\text{-C}_3\text{H}_5\text{CN}\cdot\text{AsF}_5$ 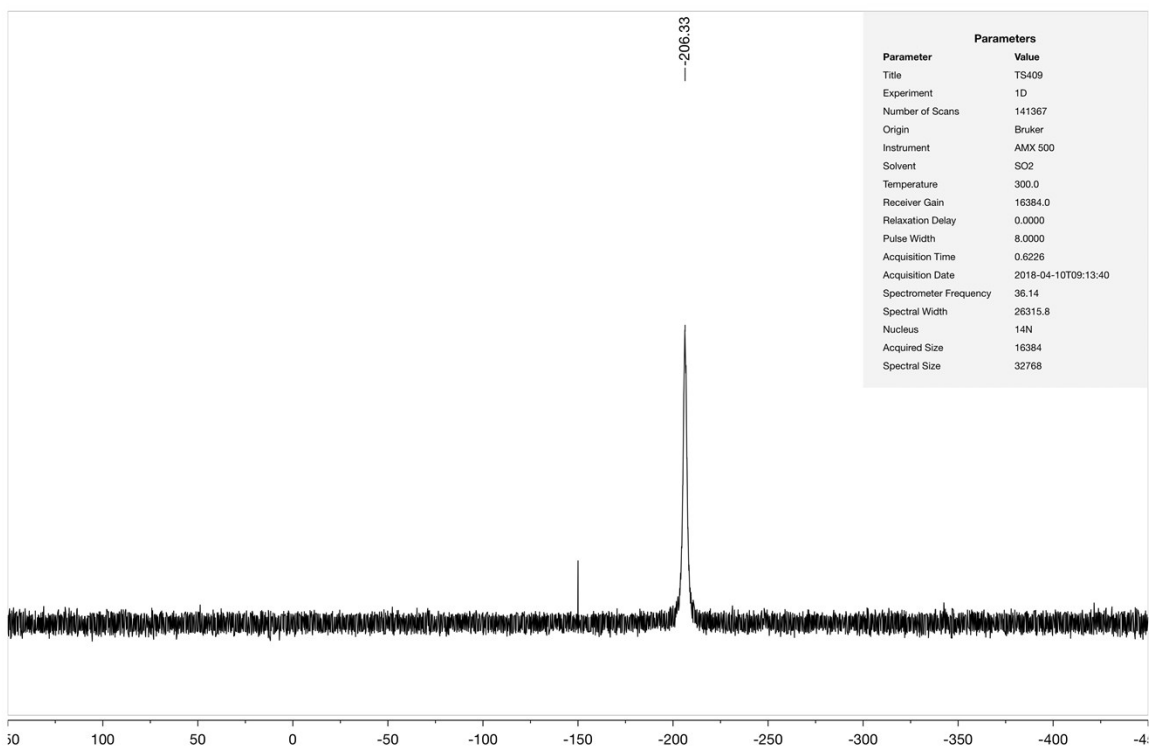 $^{19}\text{F}$  -  $c\text{-C}_3\text{H}_5\text{CN}\cdot\text{AsF}_5$ 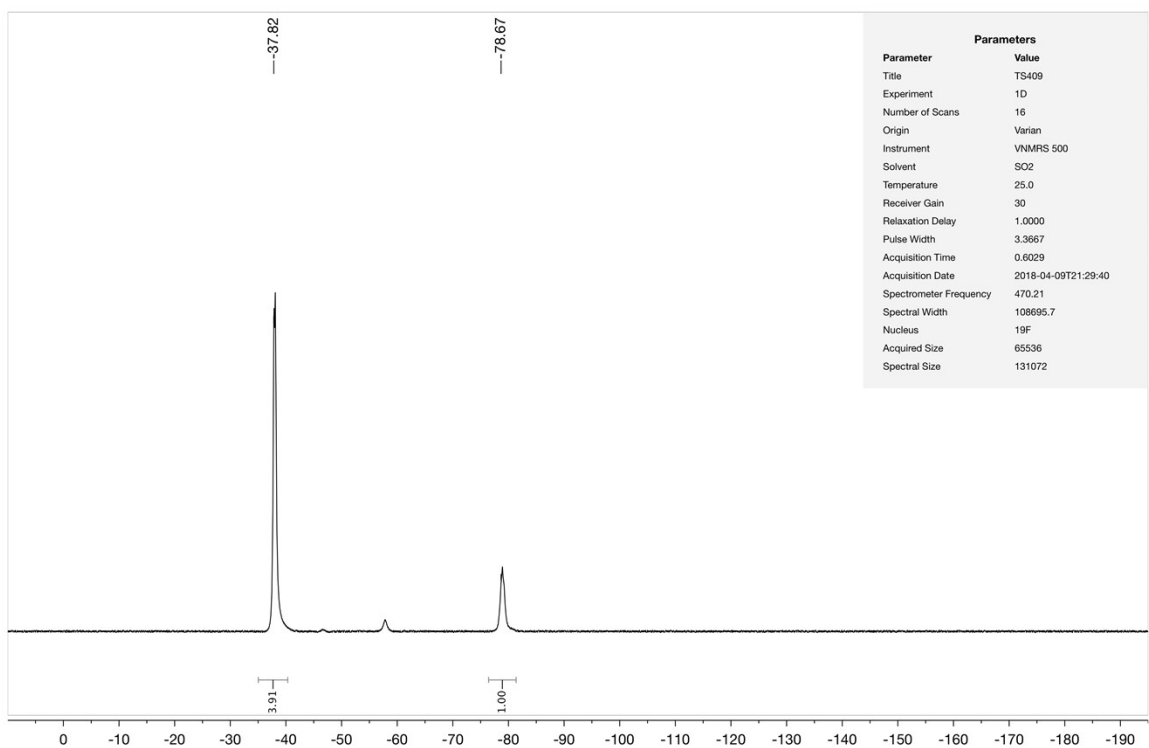

cyclo-C<sub>3</sub>H<sub>5</sub>CN•SbF<sub>5</sub><sup>1</sup>H - c-C<sub>3</sub>H<sub>5</sub>CN•SbF<sub>5</sub>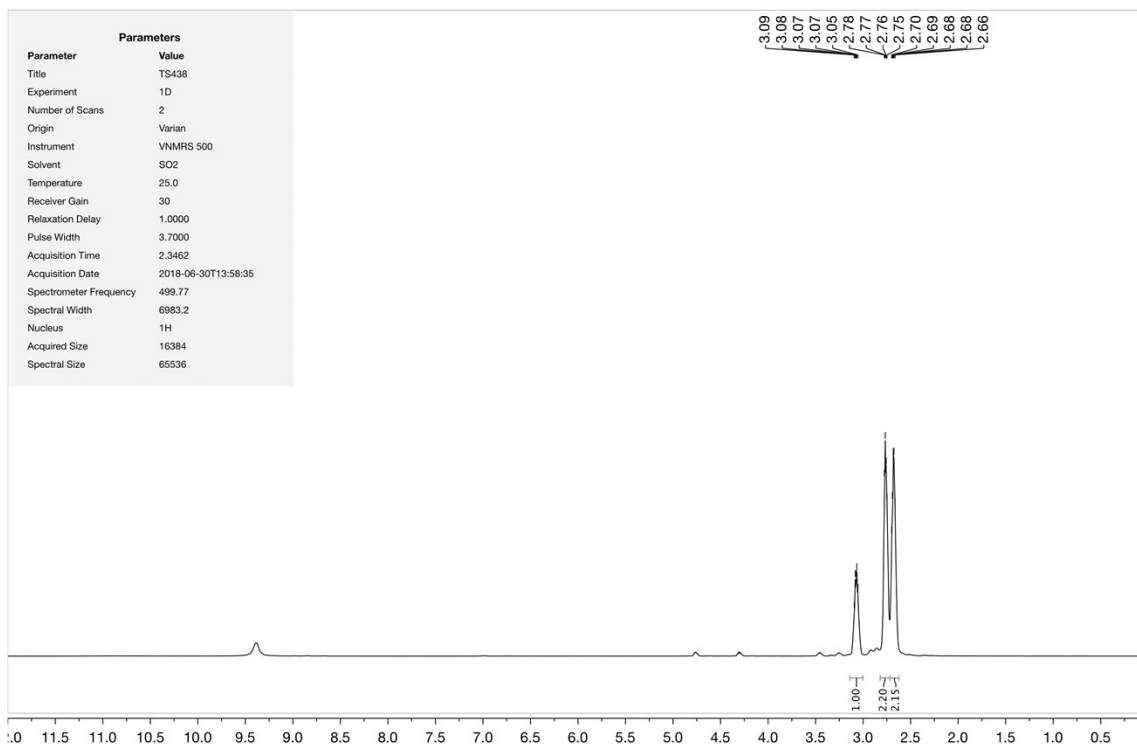<sup>13</sup>C - c-C<sub>3</sub>H<sub>5</sub>CN•SbF<sub>5</sub>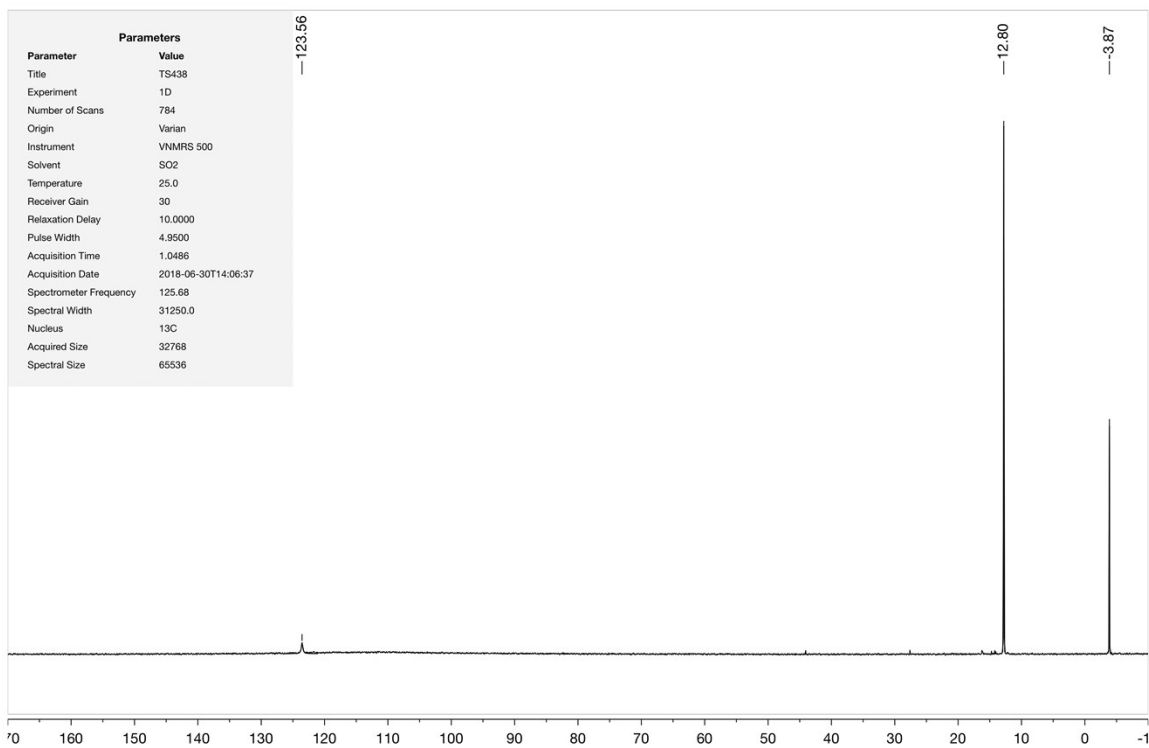

$^{14}\text{N}$  - *c*- $\text{C}_3\text{H}_5\text{CN}\cdot\text{SbF}_5$ 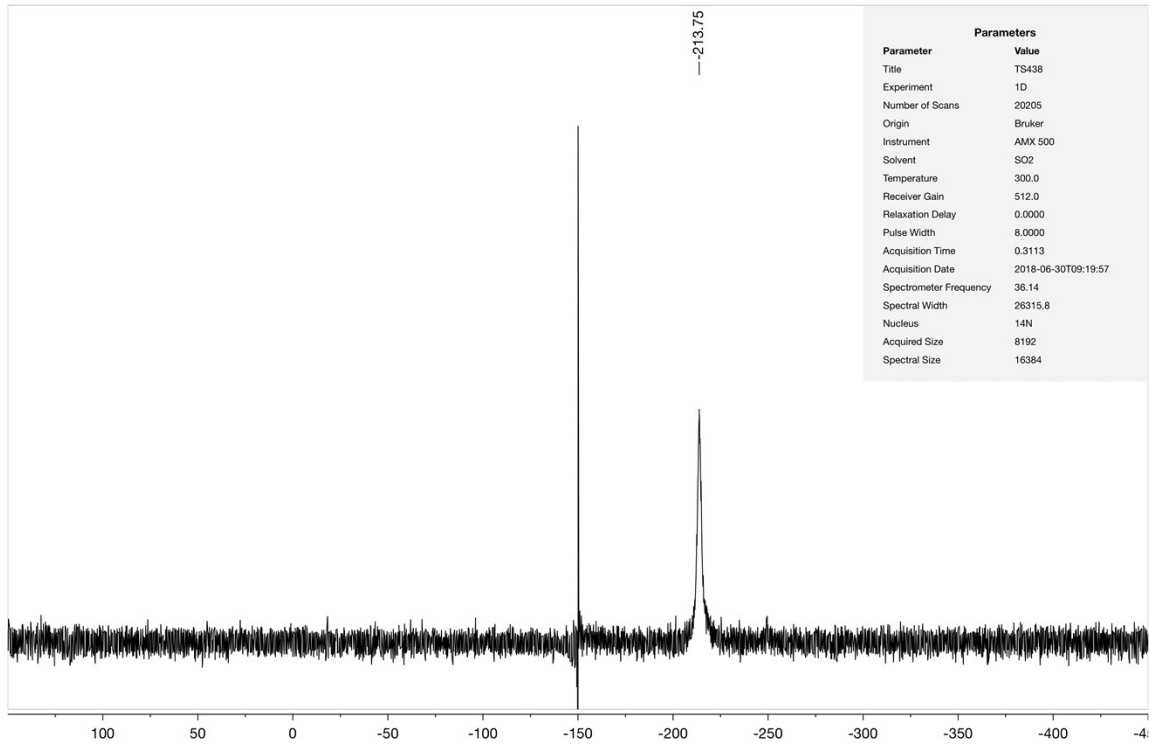 $^{19}\text{F}$  - *c*- $\text{C}_3\text{H}_5\text{CN}\cdot\text{SbF}_5$ 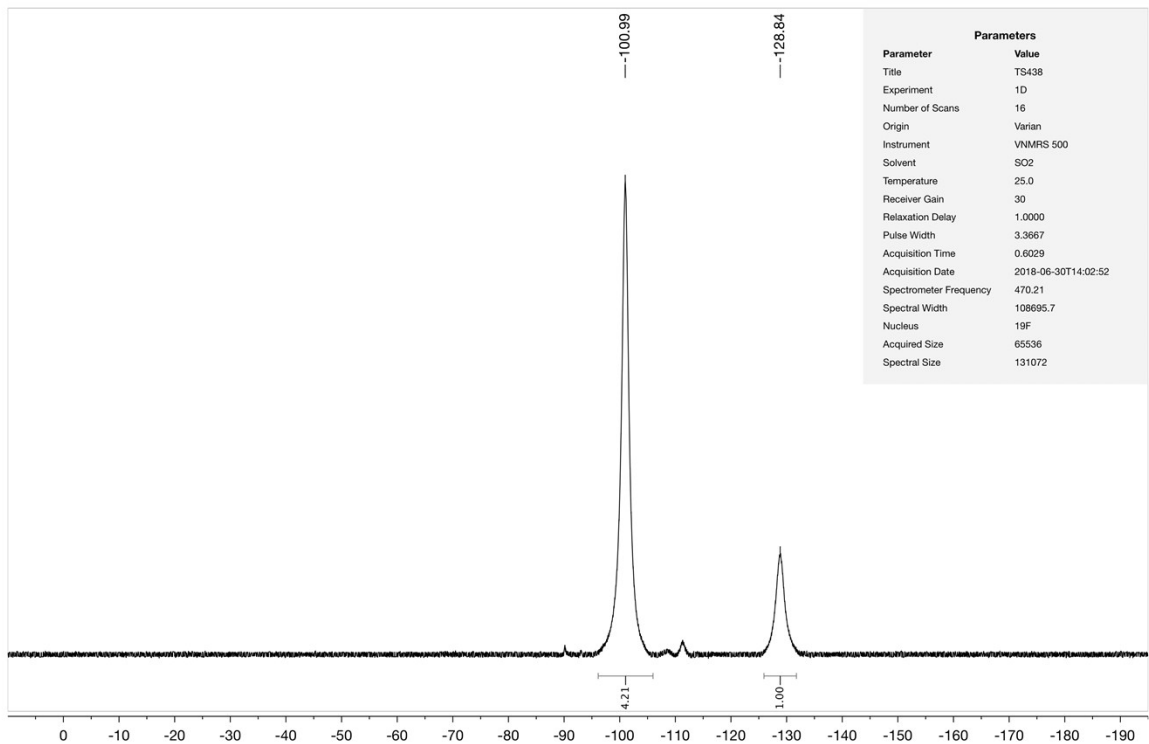

$(\text{CH}_3)_3\text{CCN}$  $^1\text{H} - (\text{CH}_3)_3\text{CCN}$ 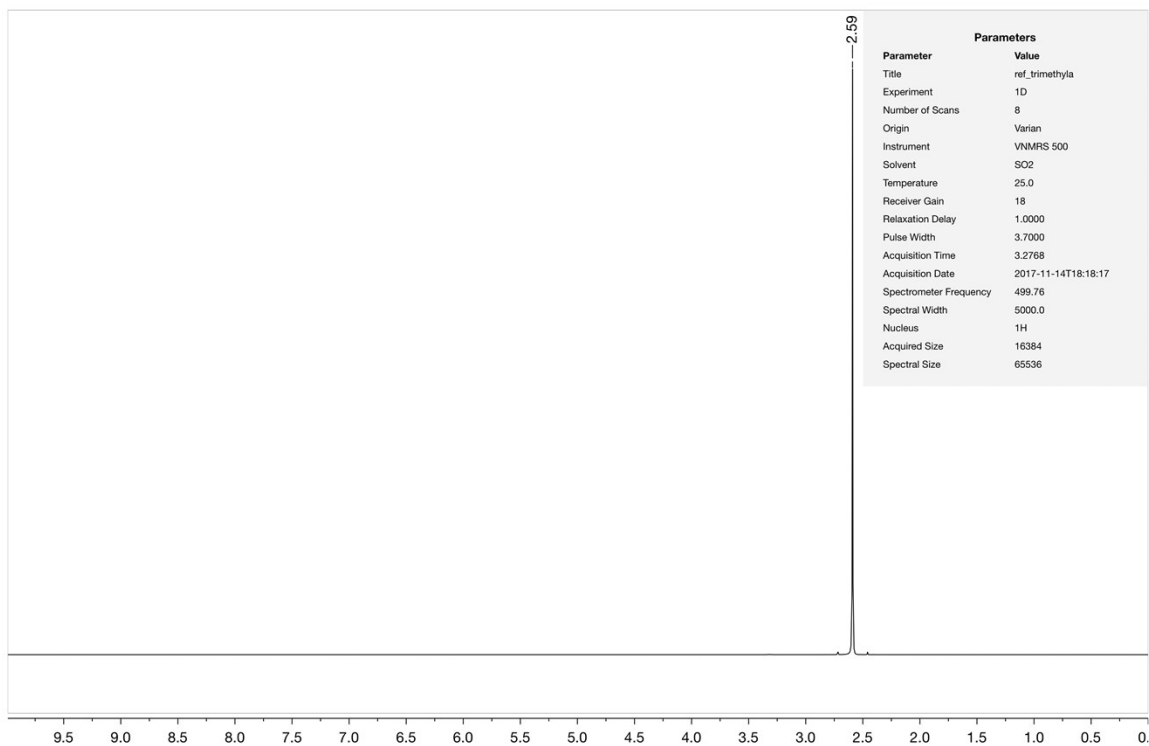 $^{13}\text{C} - (\text{CH}_3)_3\text{CCN}$ 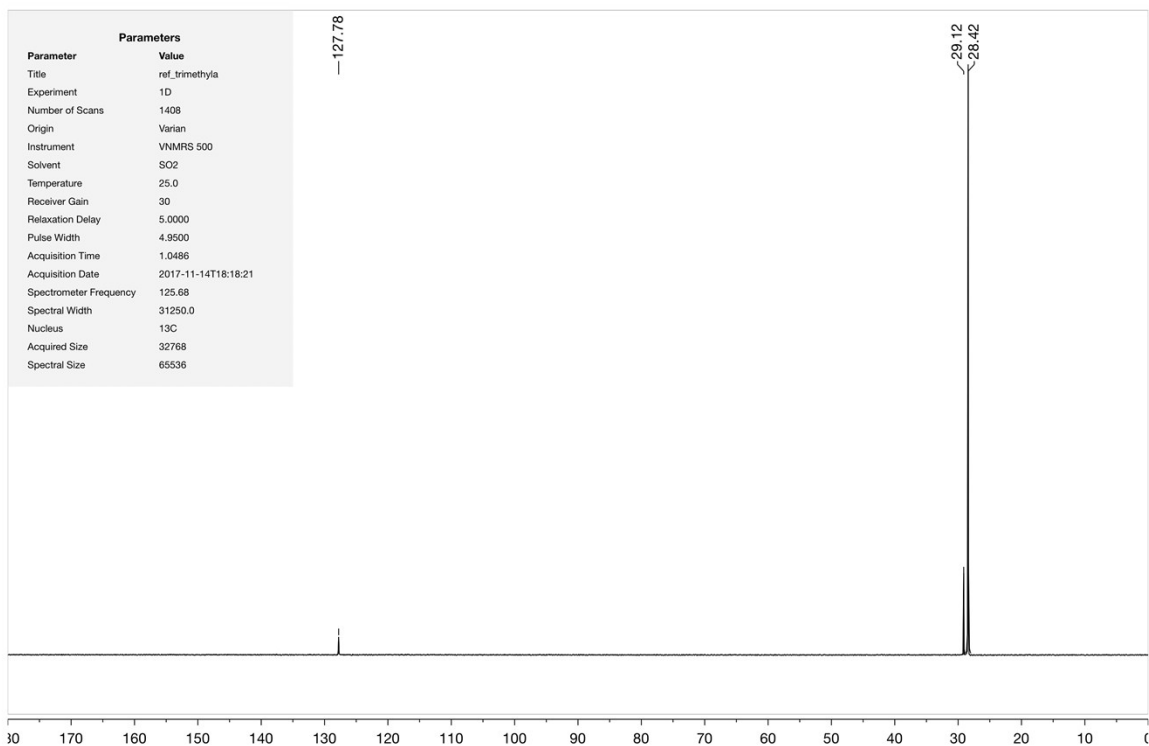



$^{14}\text{N}$  -  $(\text{CH}_3)_3\text{CCN}$ 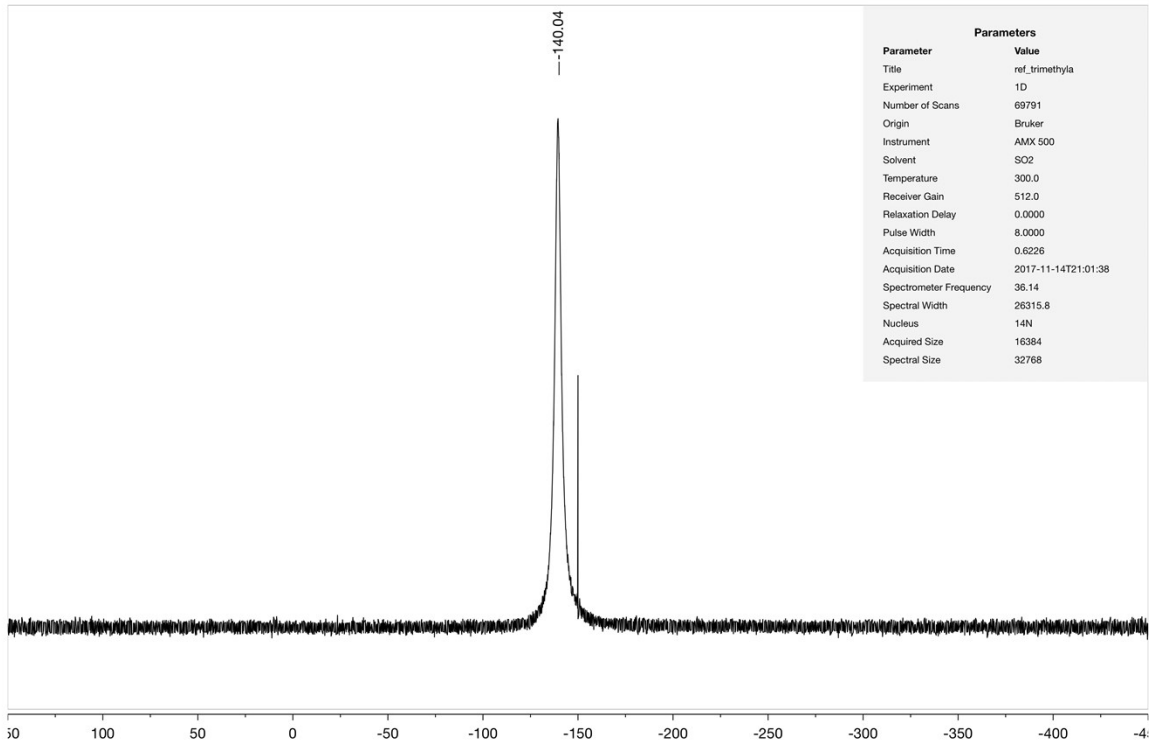

$(\text{CH}_3)_3\text{CCN}\cdot\text{AsF}_5$  $^1\text{H} - (\text{CH}_3)_3\text{CCN}\cdot\text{AsF}_5$ 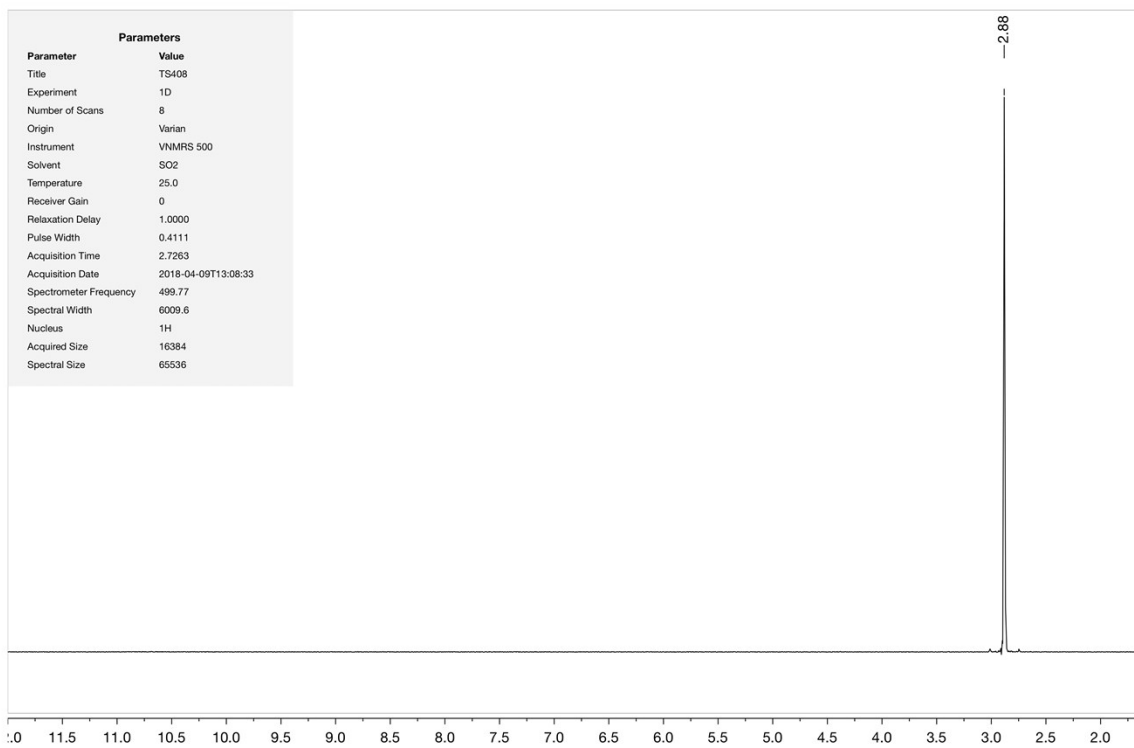 $^{13}\text{C} - (\text{CH}_3)_3\text{CCN}\cdot\text{AsF}_5$ 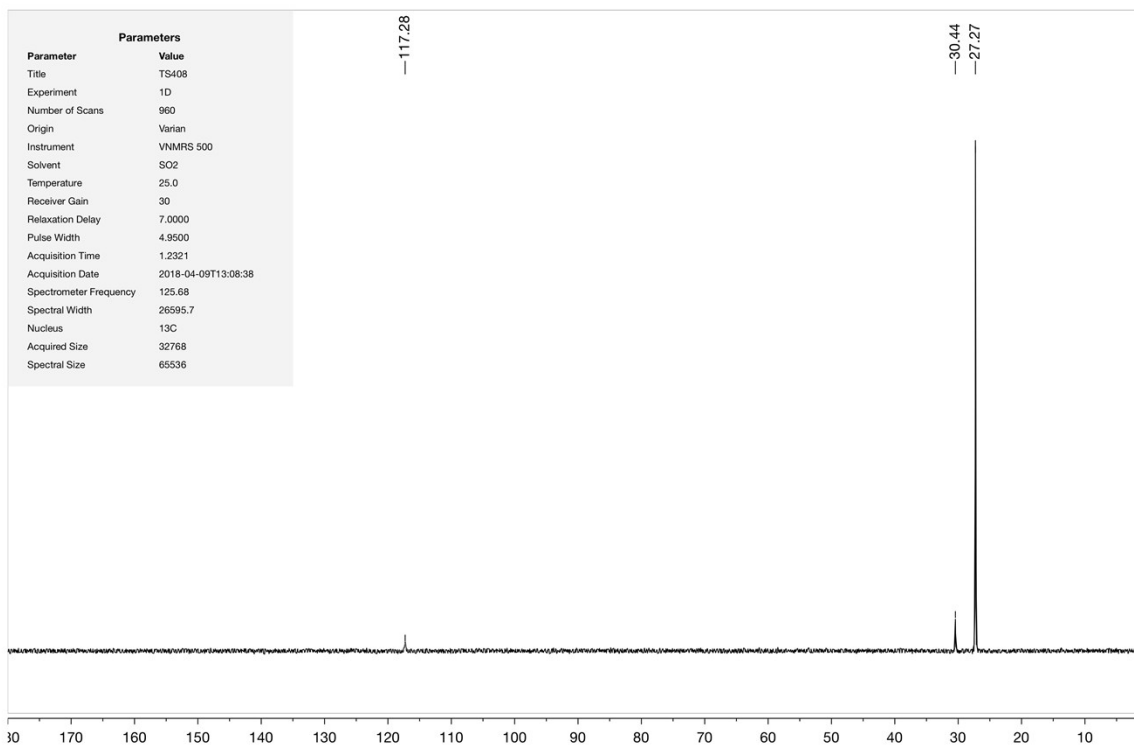

$^{14}\text{N}$  -  $(\text{CH}_3)_3\text{CCN}\cdot\text{AsF}_5$ 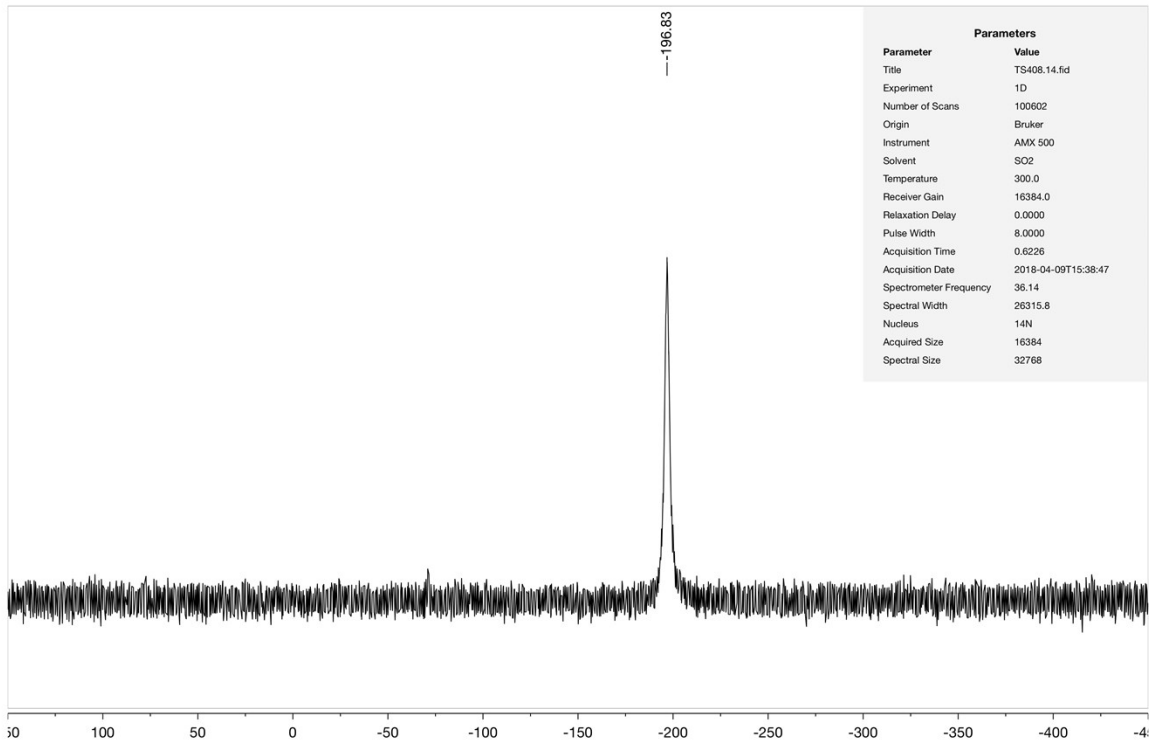 $^{19}\text{F}$  -  $(\text{CH}_3)_3\text{CCN}\cdot\text{AsF}_5$ 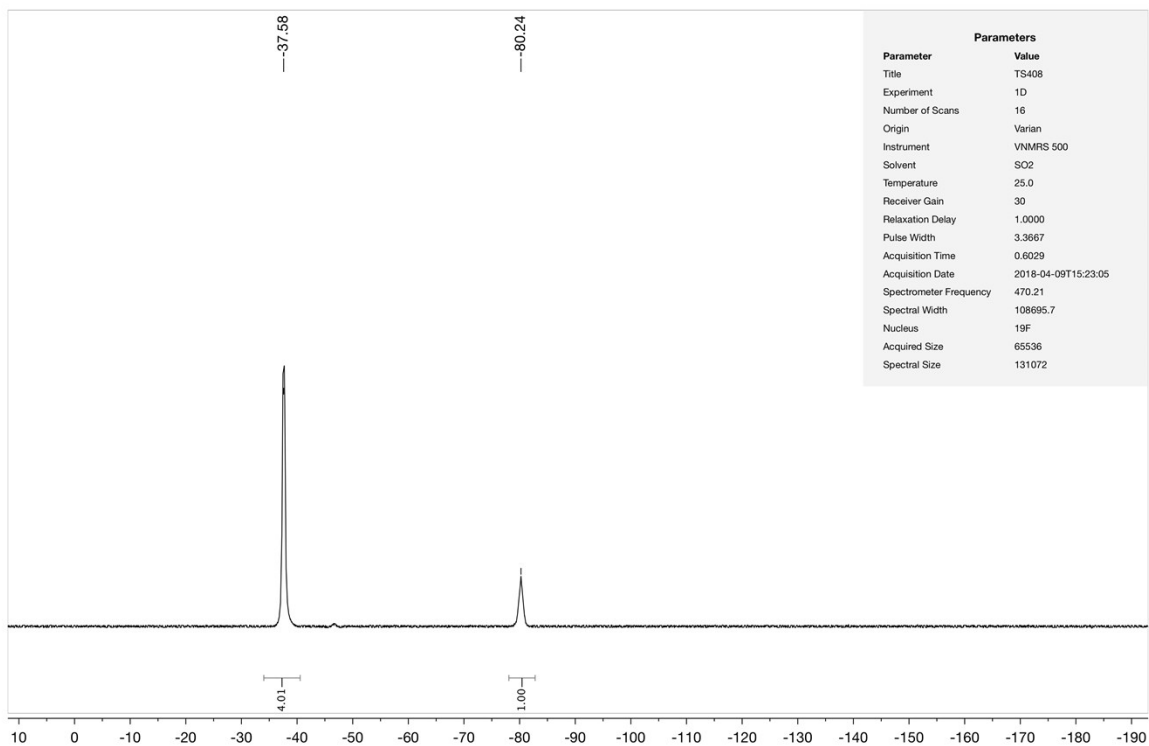

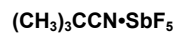 $^1\text{H} - (\text{CH}_3)_3\text{CCN}\cdot\text{SbF}_6$ 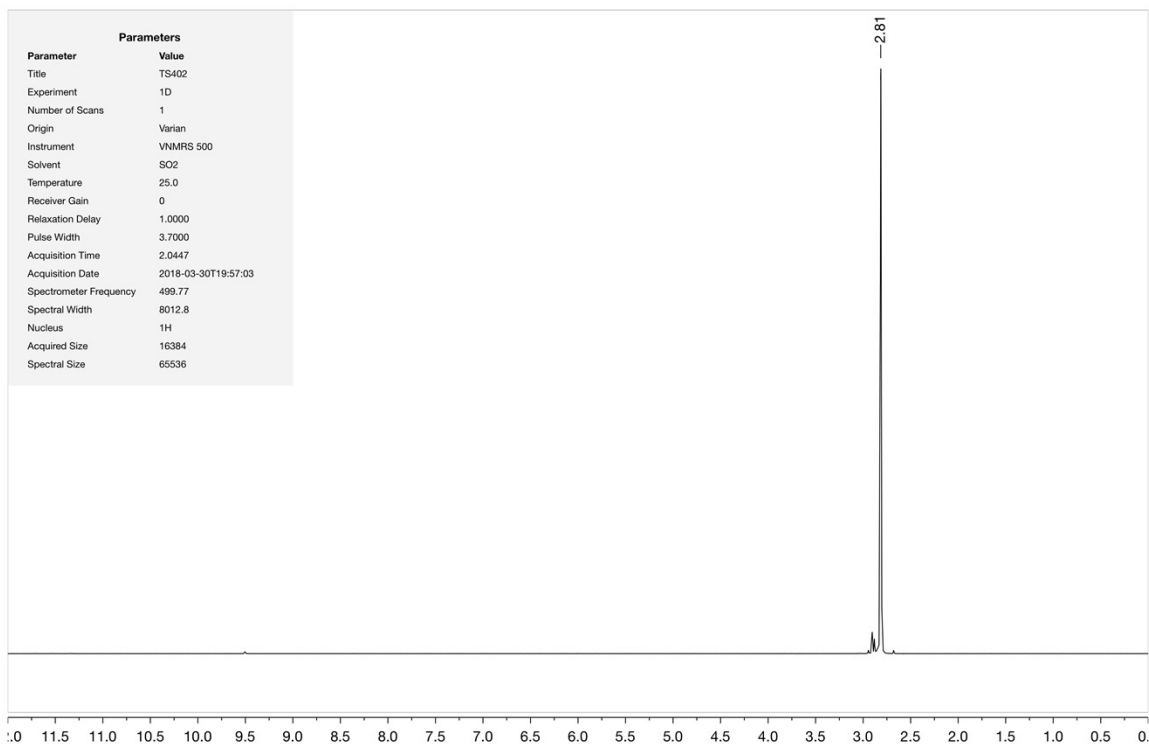

$^{13}\text{C}$  -  $(\text{CH}_3)_3\text{CCN}\cdot\text{SbF}_5$ 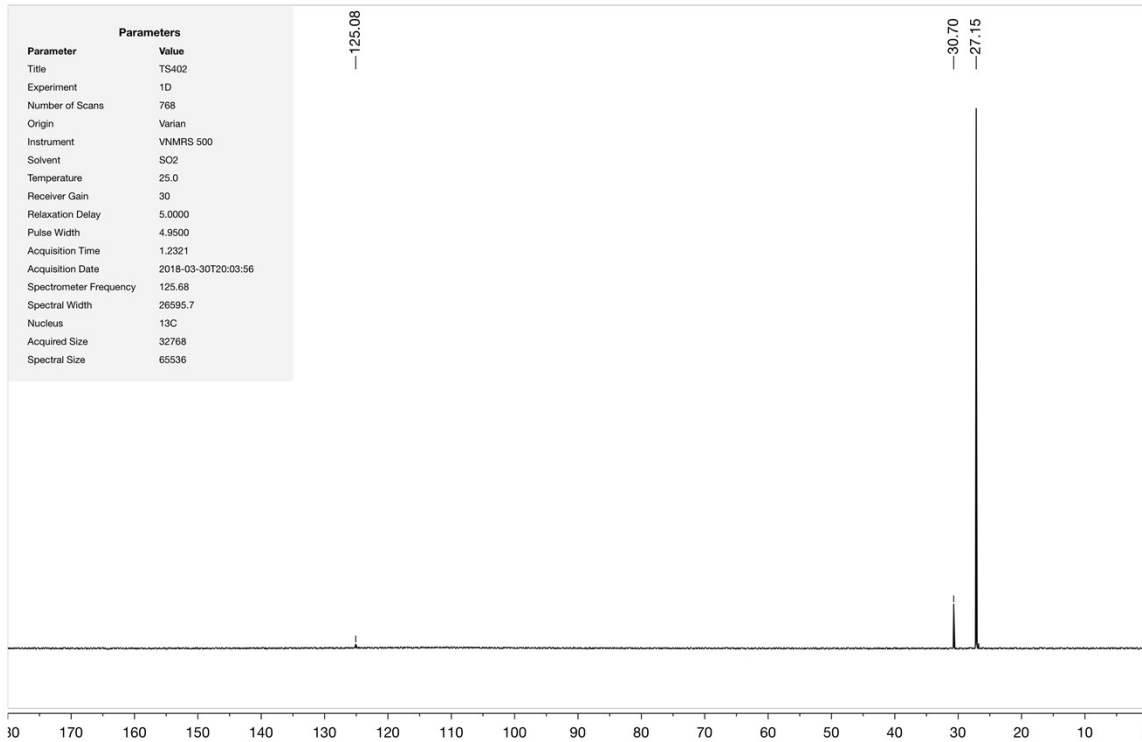

$^{14}\text{N}$  -  $(\text{CH}_3)_3\text{CCN}\cdot\text{SbF}_5$ 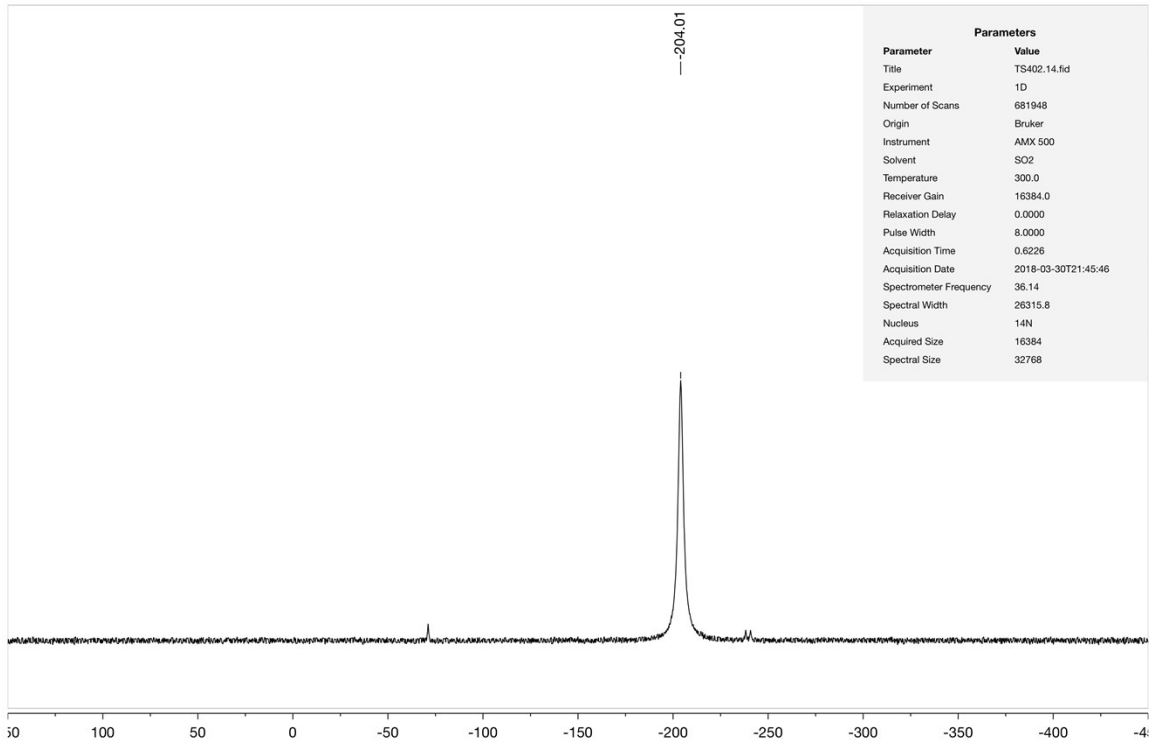 $^{19}\text{F}$  -  $(\text{CH}_3)_3\text{CCN}\cdot\text{SbF}_5$ 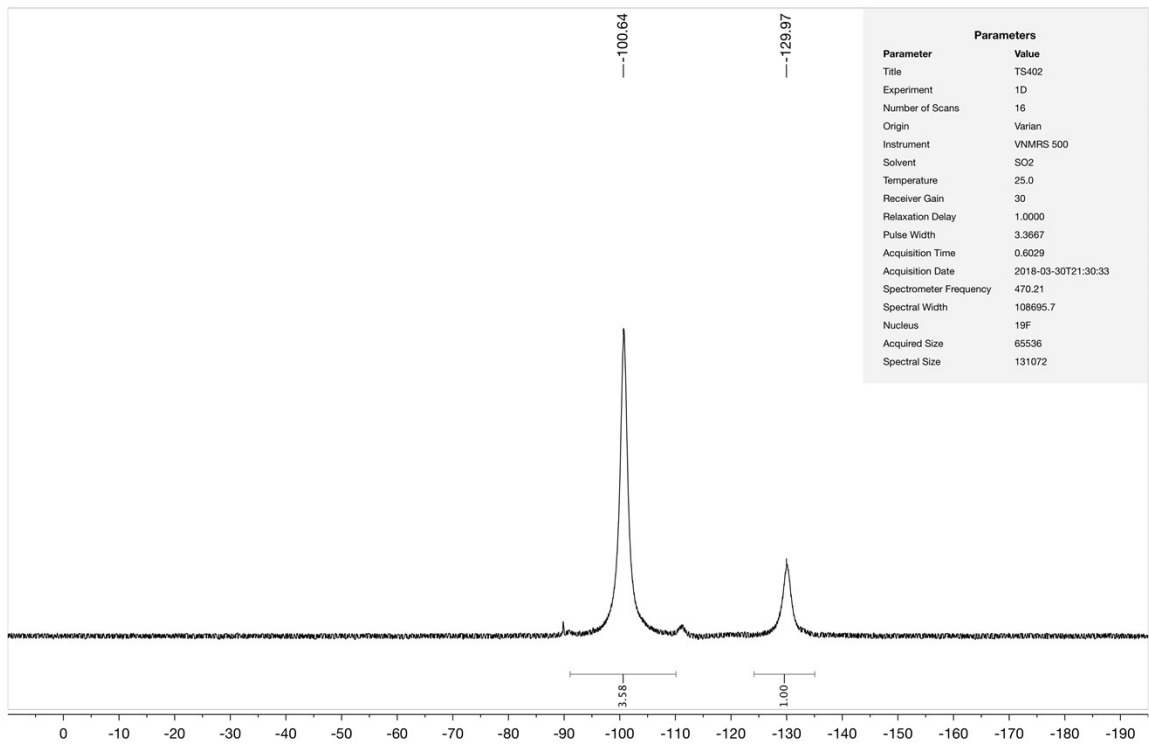

$C_6H_5CN$  $^1H - C_6H_5CN$ 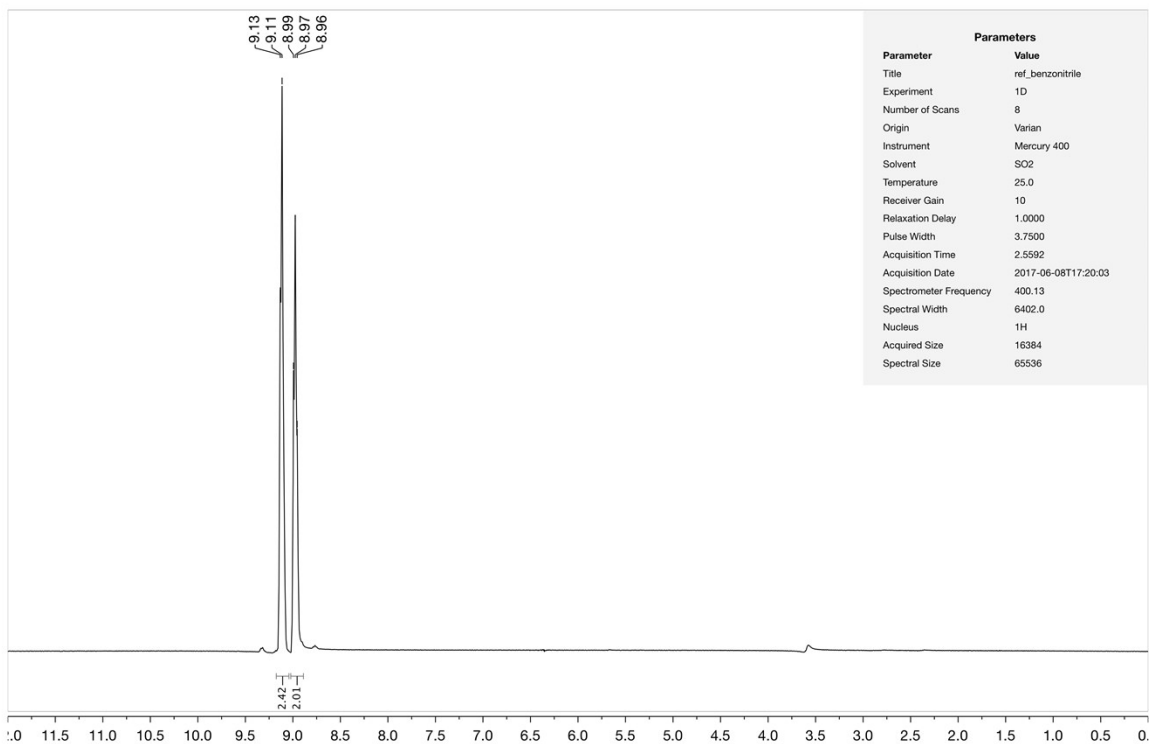 $^{13}C - C_6H_5CN$ 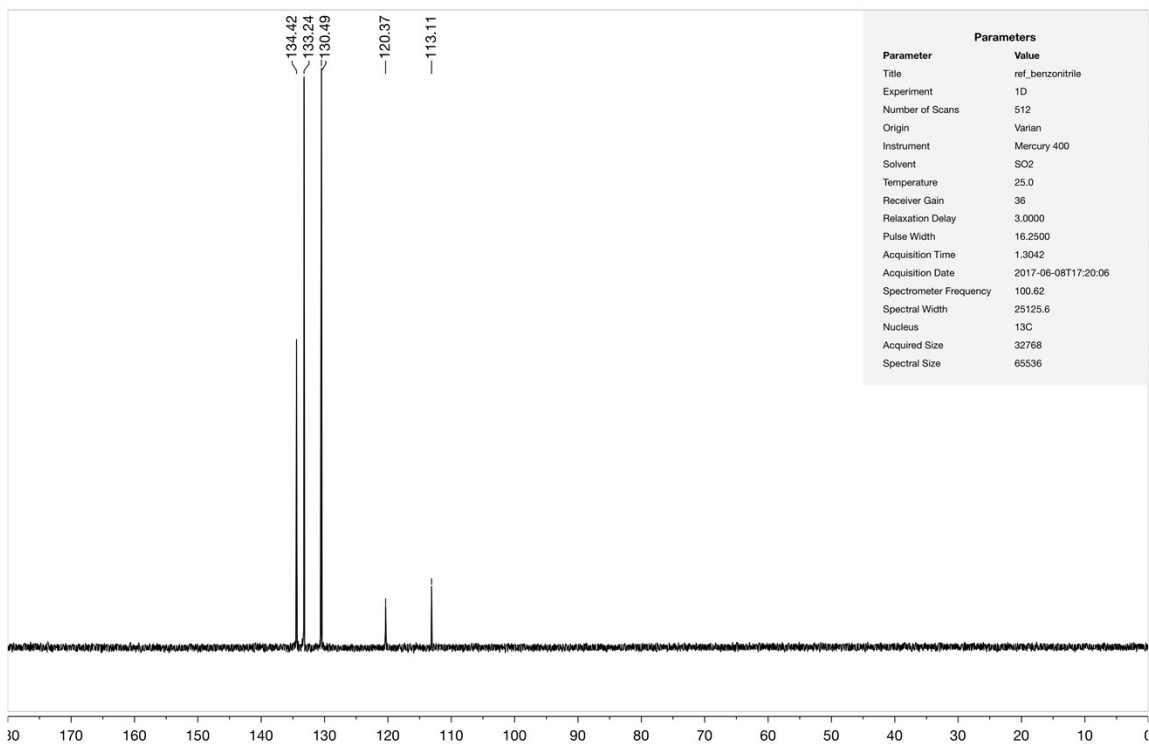

$^{14}\text{N}$  -  $\text{C}_6\text{H}_5\text{CN}$ 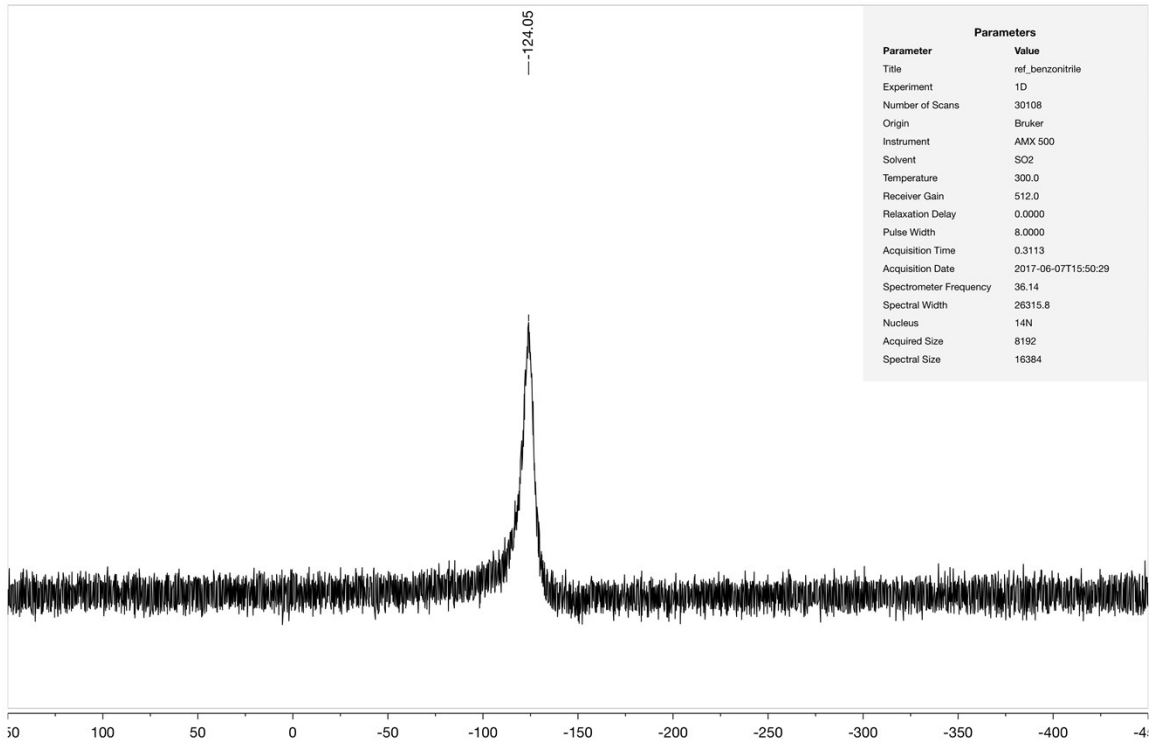



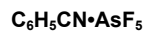 $^1\text{H} - \text{C}_6\text{H}_5\text{CN}\cdot\text{AsF}_5$ 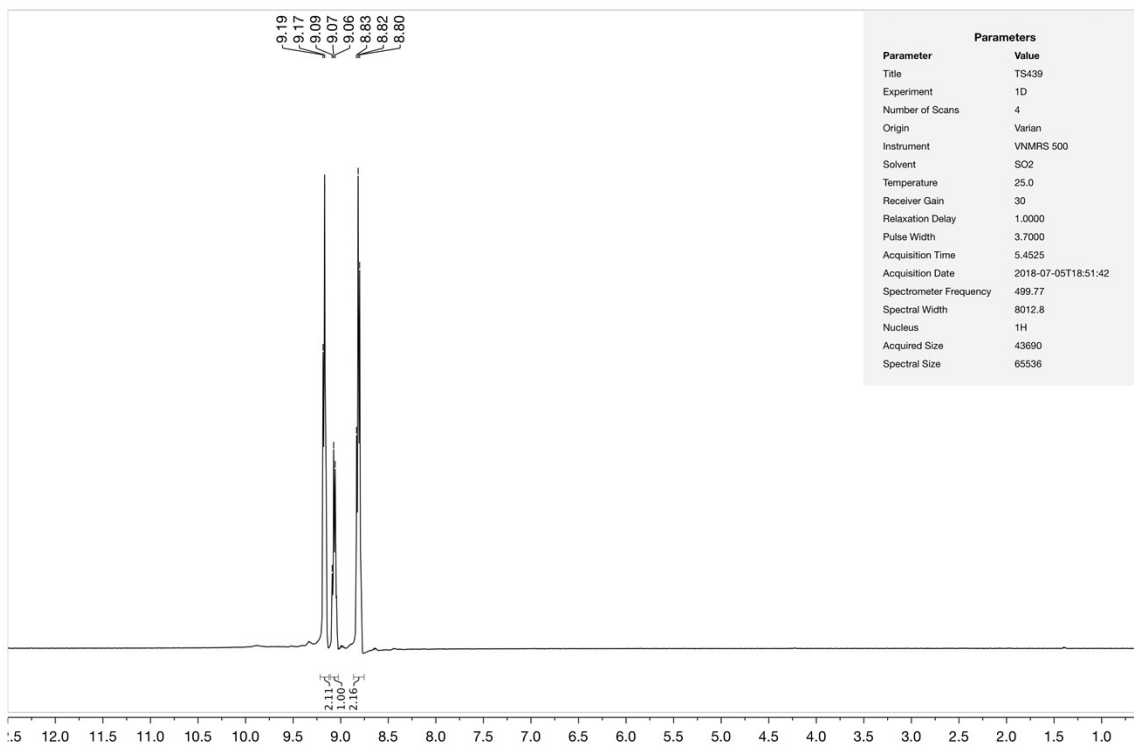 $^{13}\text{C} - \text{C}_6\text{H}_5\text{CN}\cdot\text{AsF}_5$ 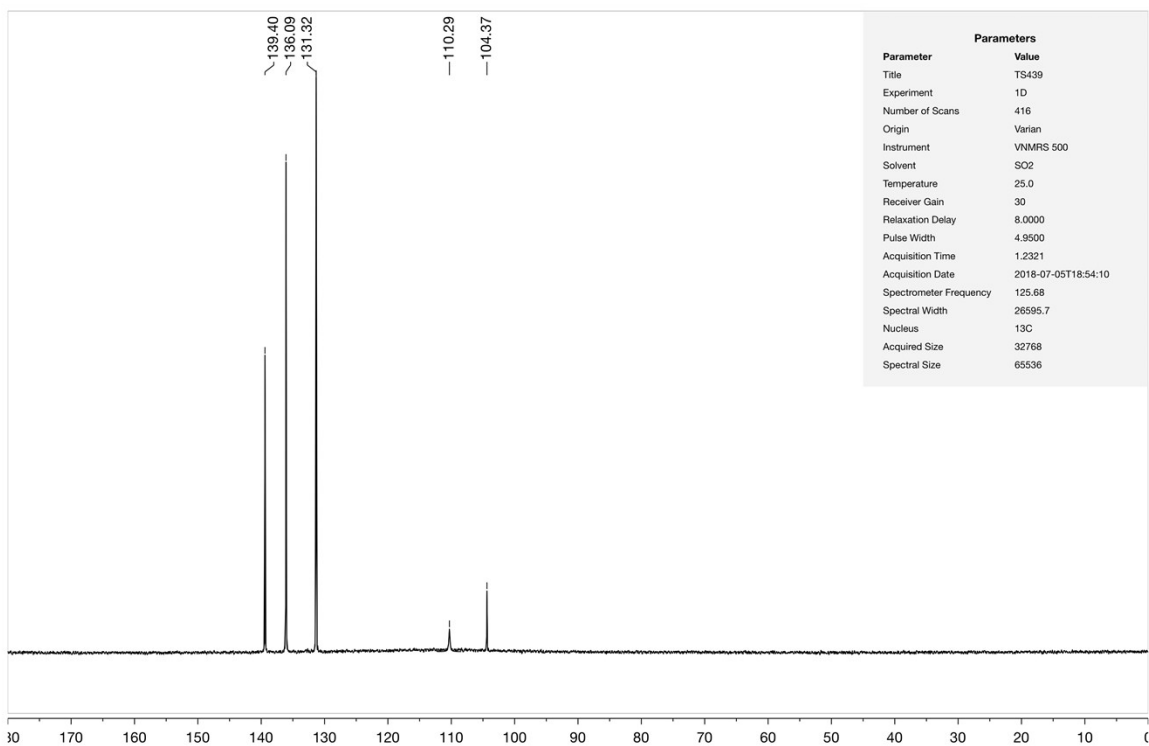

$^{14}\text{N}$  -  $\text{C}_6\text{H}_5\text{CN}\cdot\text{AsF}_5$ 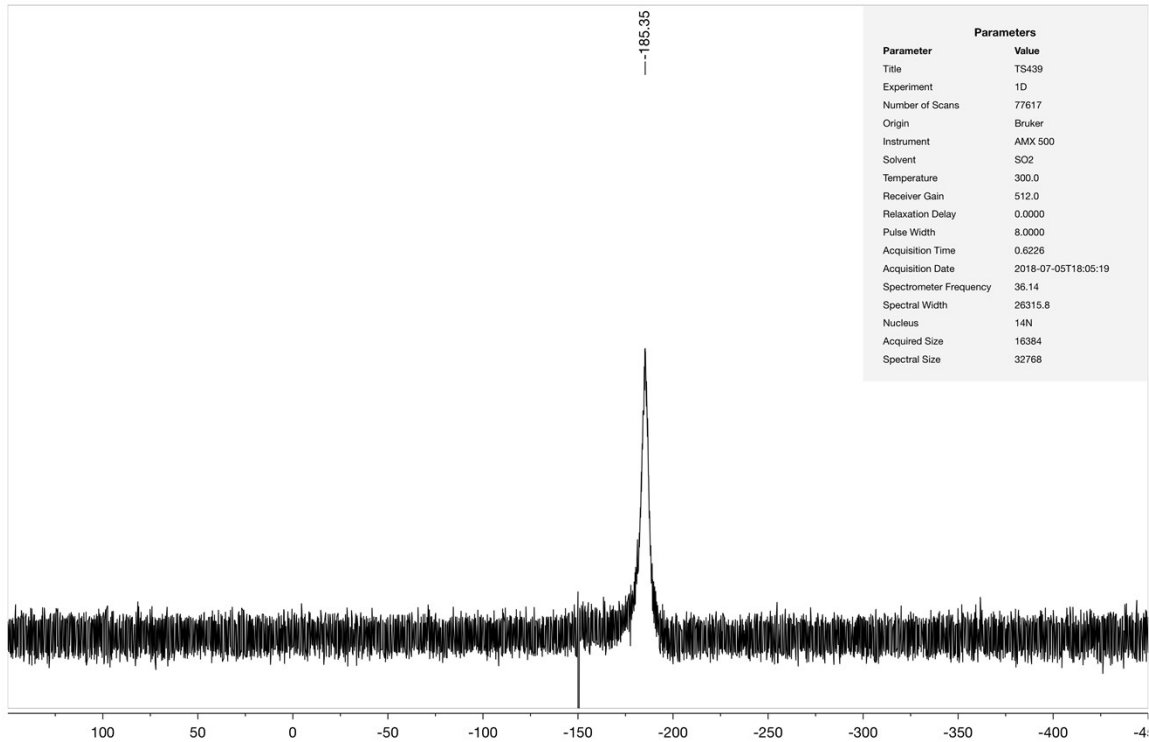 $^{19}\text{F}$  -  $\text{C}_6\text{H}_5\text{CN}\cdot\text{AsF}_5$ 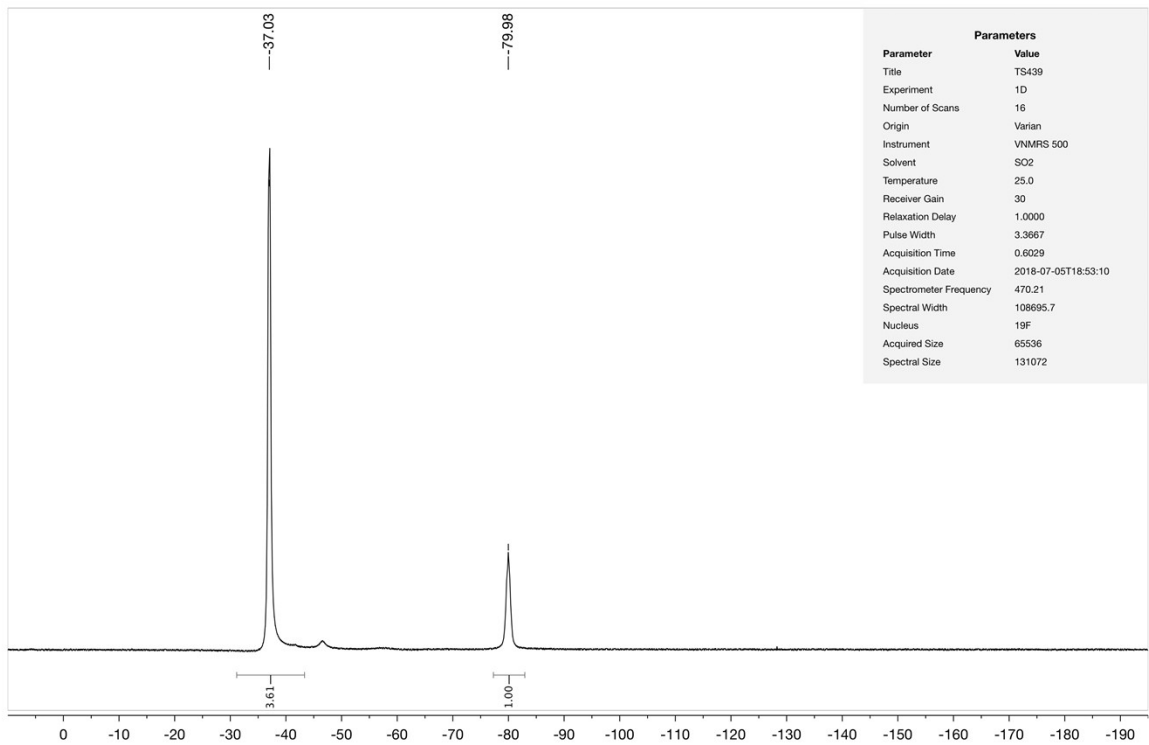

$^1\text{H}$ - $^{13}\text{C}$  HMBC -  $\text{C}_6\text{H}_5\text{CN}\cdot\text{AsF}_5$ 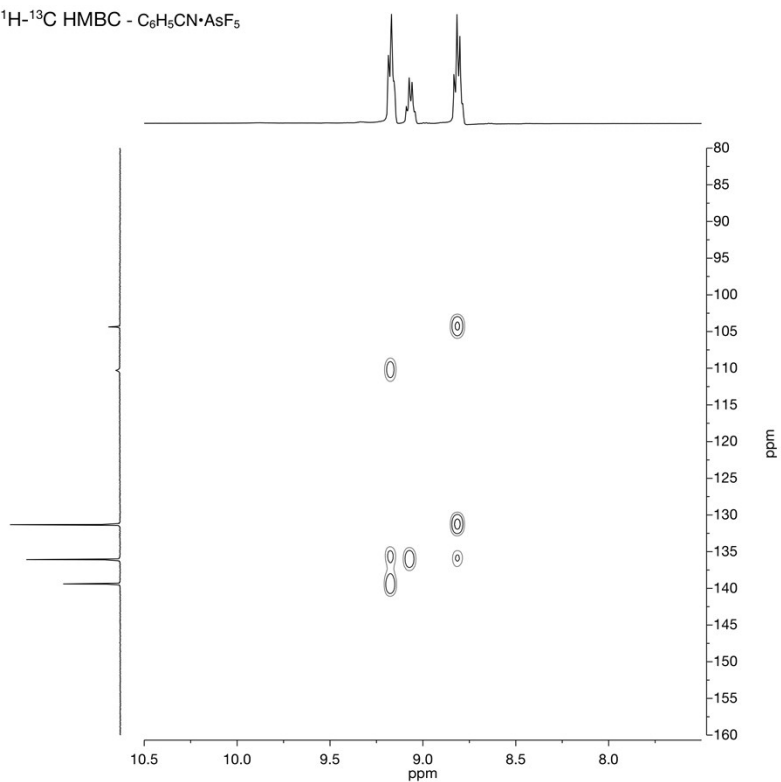

| Parameters             |                     |
|------------------------|---------------------|
| Parameter              | Value               |
| Title                  | TS439               |
| Experiment             | HMBC                |
| Number of Scans        | 2                   |
| Origin                 | Varian              |
| Instrument             | VNMRS 500           |
| Solvent                | SO2                 |
| Temperature            | 25.0                |
| Pulse Sequence         | gHMBCAD             |
| Receiver Gain          | 30                  |
| Relaxation Delay       | 1.0000              |
| Pulse Width            | 7.4000              |
| Acquisition Time       | 0.1500              |
| Acquisition Date       | 2018-07-05T20:05:16 |
| Nucleus                | (1H, 13C)           |
| Spectrometer Frequency | (499.77, 125.68)    |
| Spectral Width         | (8012.8, 30154.5)   |
| Lowest Frequency       | (255.3, -1579.3)    |
| Acquired Size          | (1202, 64)          |
| Spectral Size          | (2048, 512)         |

$C_6H_5CN \cdot SbF_5$  $^1H - C_6H_5CN \cdot SbF_5$ 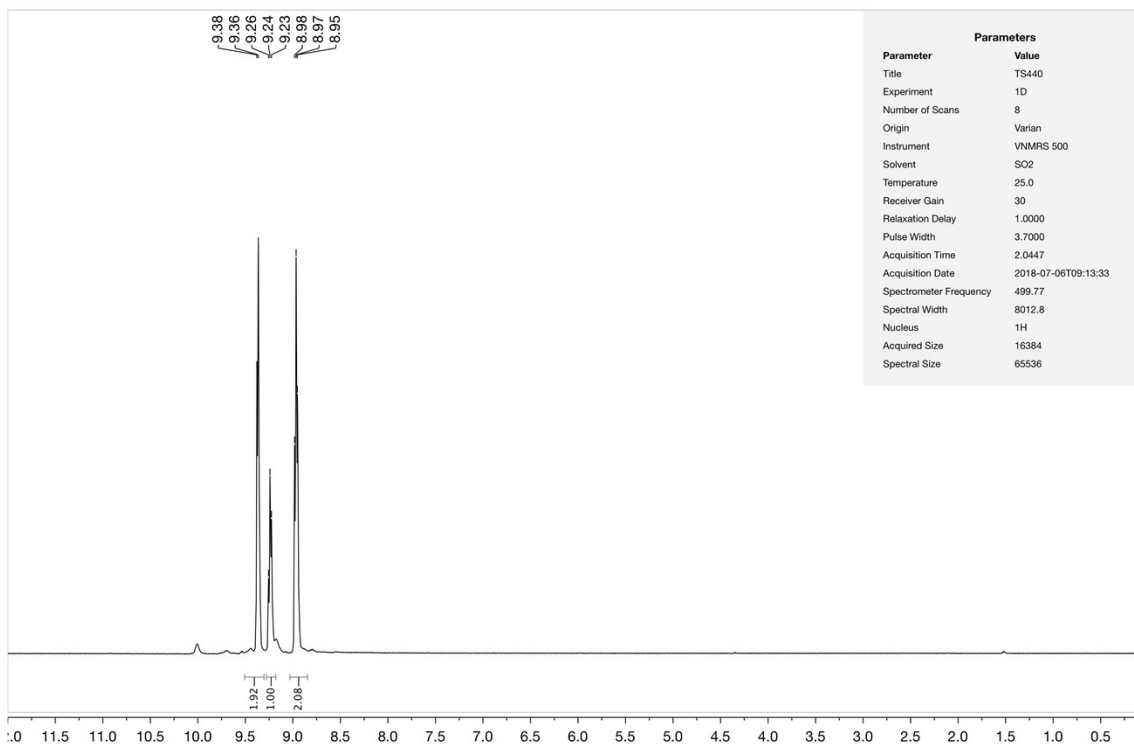 $^{13}C - C_6H_5CN \cdot SbF_5$ 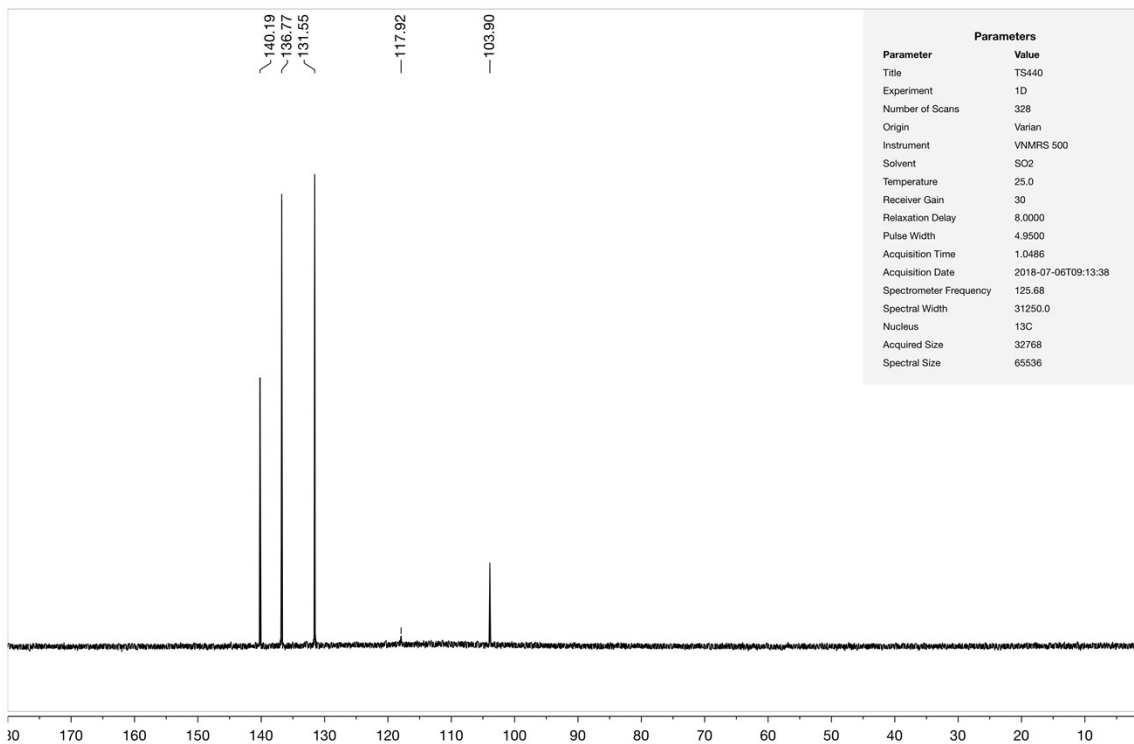

$^{14}\text{N}$  -  $\text{C}_6\text{H}_5\text{CN}\cdot\text{SbF}_5$ 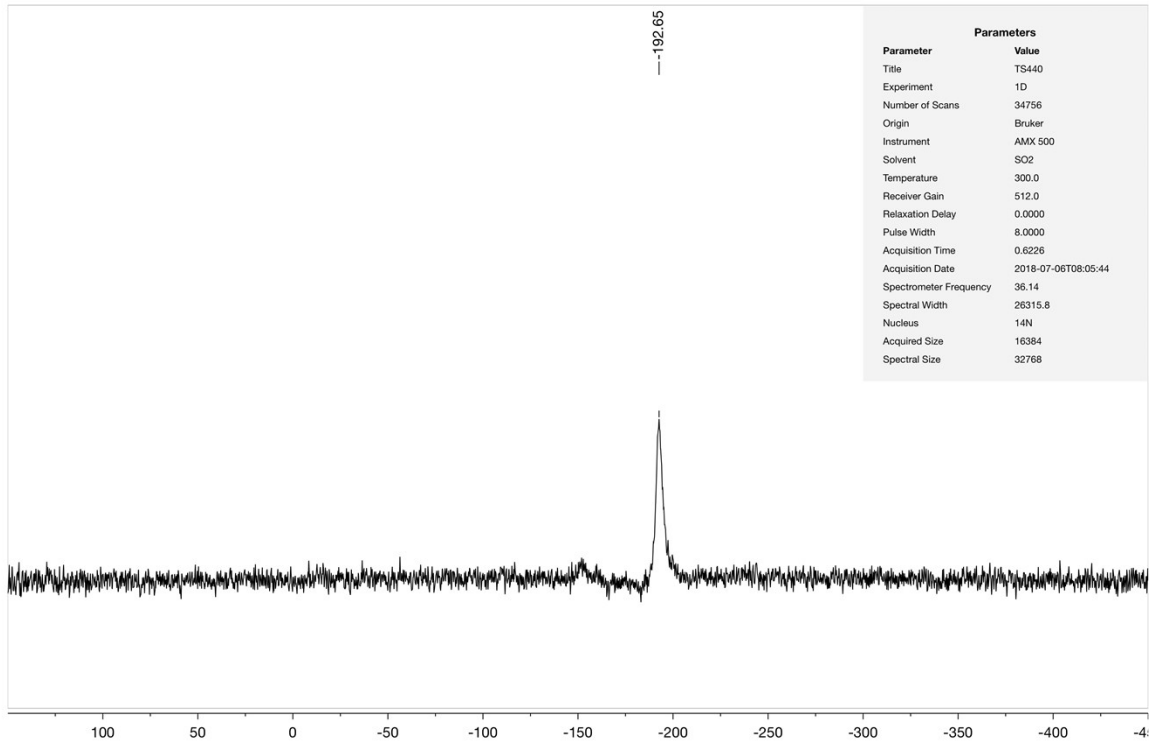 $^{19}\text{F}$  -  $\text{C}_6\text{H}_5\text{CN}\cdot\text{SbF}_5$ 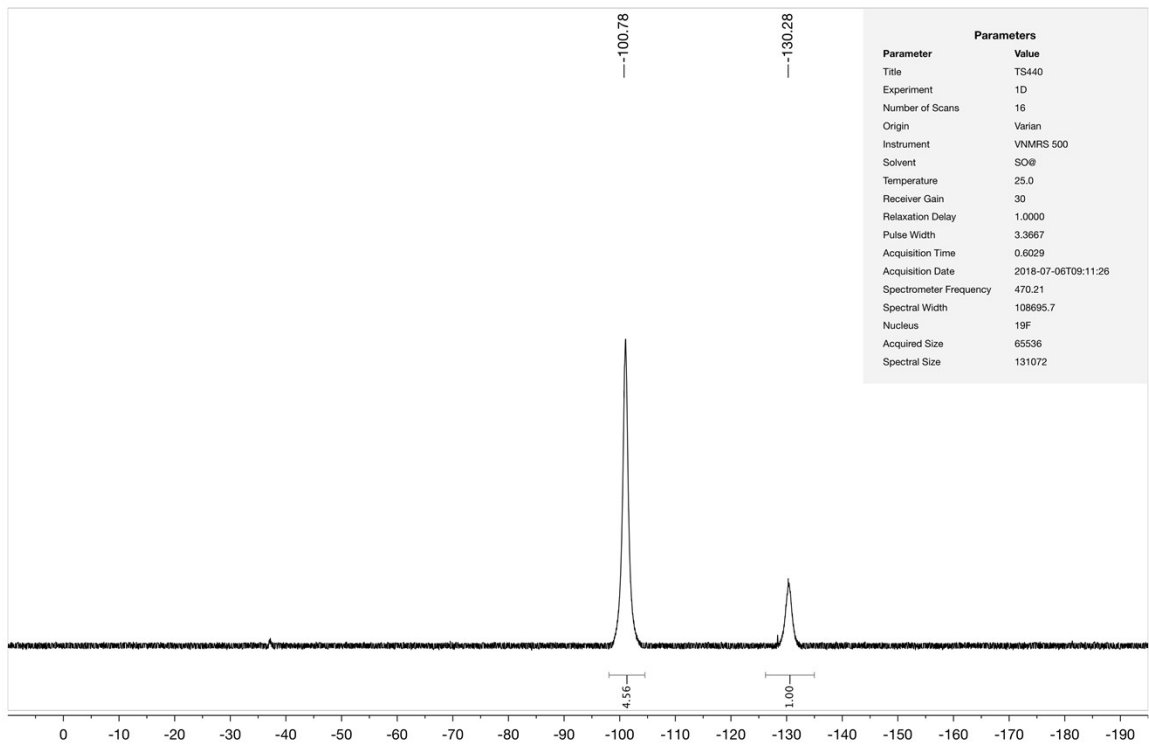

**Table S1-0. Comparison of NMR chemical shifts for the Lewis adducts and the free nitriles.**

| Compound                                                    | <sup>13</sup> C / ppm        |        | <sup>14</sup> N / ppm                     |        | <sup>19</sup> F / ppm |                   |
|-------------------------------------------------------------|------------------------------|--------|-------------------------------------------|--------|-----------------------|-------------------|
|                                                             | RCN•MF <sub>5</sub>          | RCN    | RCN•MF <sub>5</sub>                       | RCN    | MF <sub>4</sub> F     | MF <sub>4</sub> F |
| HCN•AsF <sub>5</sub>                                        | 100.39                       | 110.88 | -186.7                                    | -124.8 | -39.5                 |                   |
| HCN•SbF <sub>5</sub>                                        | 106.88                       |        | -194.6                                    |        | -100.6                | -133.2            |
| NCCH <sub>2</sub> CN•AsF <sub>5</sub>                       | 104.99 <sup>a</sup>          | 111.42 | -187.4 <sup>b</sup> (-121.4) <sup>c</sup> | -125.9 | -45.1                 |                   |
| NCCH <sub>2</sub> CN•SbF <sub>5</sub>                       | 110.38 (106.75) <sup>c</sup> |        | -192.3 (-123.1) <sup>c</sup>              |        | -100.1                | -133.5            |
| C <sub>3</sub> H <sub>7</sub> CN•AsF <sub>5</sub>           | 113.64                       | 122.11 | -195.07                                   | -134.9 | -37.6                 | -80.0             |
| C <sub>3</sub> H <sub>7</sub> CN•SbF <sub>5</sub>           | 121.51                       |        | -202.5                                    |        | -101.1                | -130.4            |
| <i>c</i> -C <sub>3</sub> H <sub>5</sub> CN•AsF <sub>5</sub> | 115.41                       | 124.32 | -206.3                                    | -144.1 | -37.8                 | -78.7             |
| <i>c</i> -C <sub>3</sub> H <sub>5</sub> CN•SbF <sub>5</sub> | 123.56                       |        | -213.8                                    |        | -101.0                | -128.8            |
| (CH <sub>3</sub> ) <sub>3</sub> CCN•AsF <sub>5</sub>        | 117.28                       | 127.78 | 196.8                                     | -140.0 | -37.6                 | -80.24            |
| (CH <sub>3</sub> ) <sub>3</sub> CCN•SbF <sub>5</sub>        | 125.08                       |        | -204.0                                    |        | -100.6                | -130.0            |
| C <sub>6</sub> H <sub>5</sub> CN•AsF <sub>5</sub>           | 110.29                       | 120.37 | -185.4                                    | -124.1 | -37.0                 | 80.0              |
| C <sub>6</sub> H <sub>5</sub> CN•SbF <sub>5</sub>           | 117.92                       |        | -192.7                                    |        | -100.78               | -130.3            |
| AsF <sub>5</sub> •NCCH <sub>2</sub> CN•AsF <sub>5</sub>     | 100.83                       | 111.42 | 175.8                                     | -125.9 | -45.3                 |                   |
| SbF <sub>5</sub> •NCCH <sub>2</sub> CN•SbF <sub>5</sub>     | 106.25                       |        | 186.1                                     |        | -99.5                 | -134.7            |

(a) recorded at 298 K, exchange of coordinated and free CN, mean chemical shift (b) recorded at 218 K to freeze exchange (c) shift of non-coordinating cyano group in parenthesis.

# Raman Spectra

## HCN

rHCN

colorless liquid, J-Young NMR tube, r.t.

9/26/2016 3:59:06 PM

50 Scans 2 cm-1 50 mW

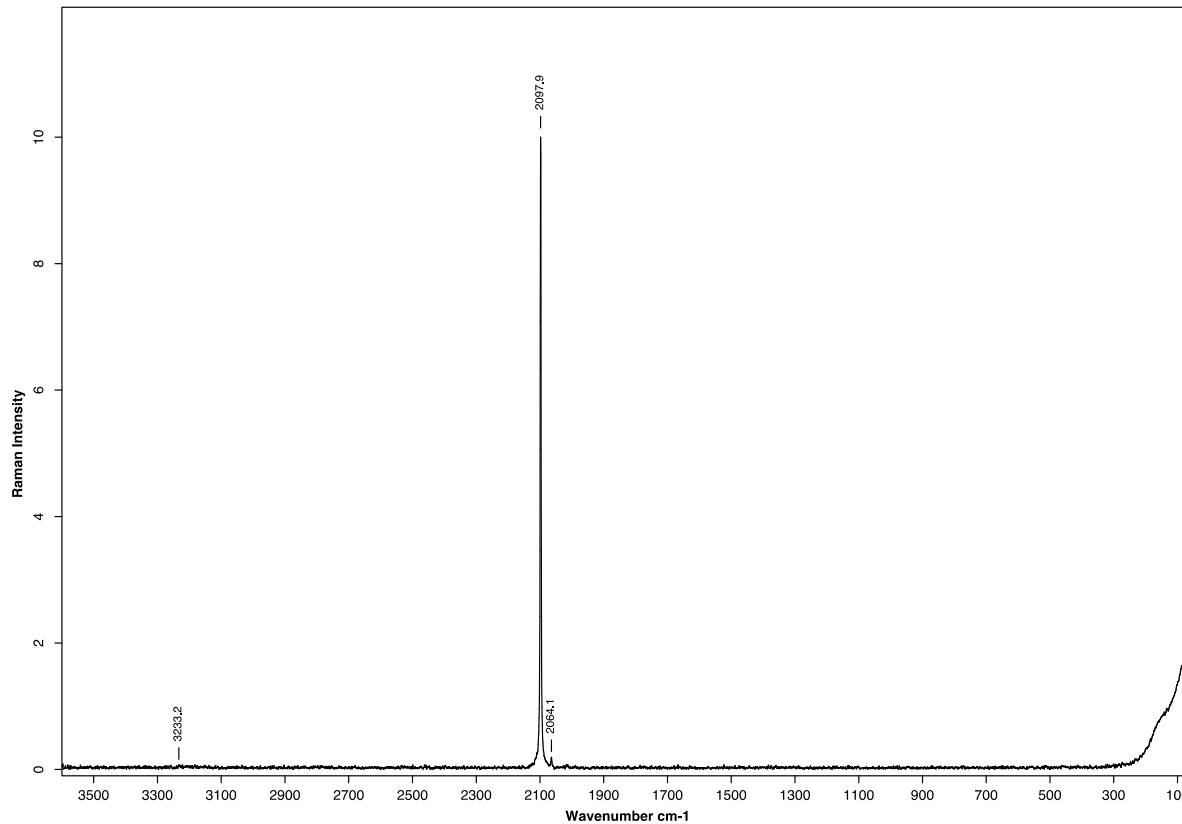

File Name: rHCN.1

**HCN·AsF<sub>5</sub>****TS221**

white solid, 9 mm FEP tube, -80°C

10/12/2016 11:43:46 AM

50 Scans 2 cm-1 350 mW

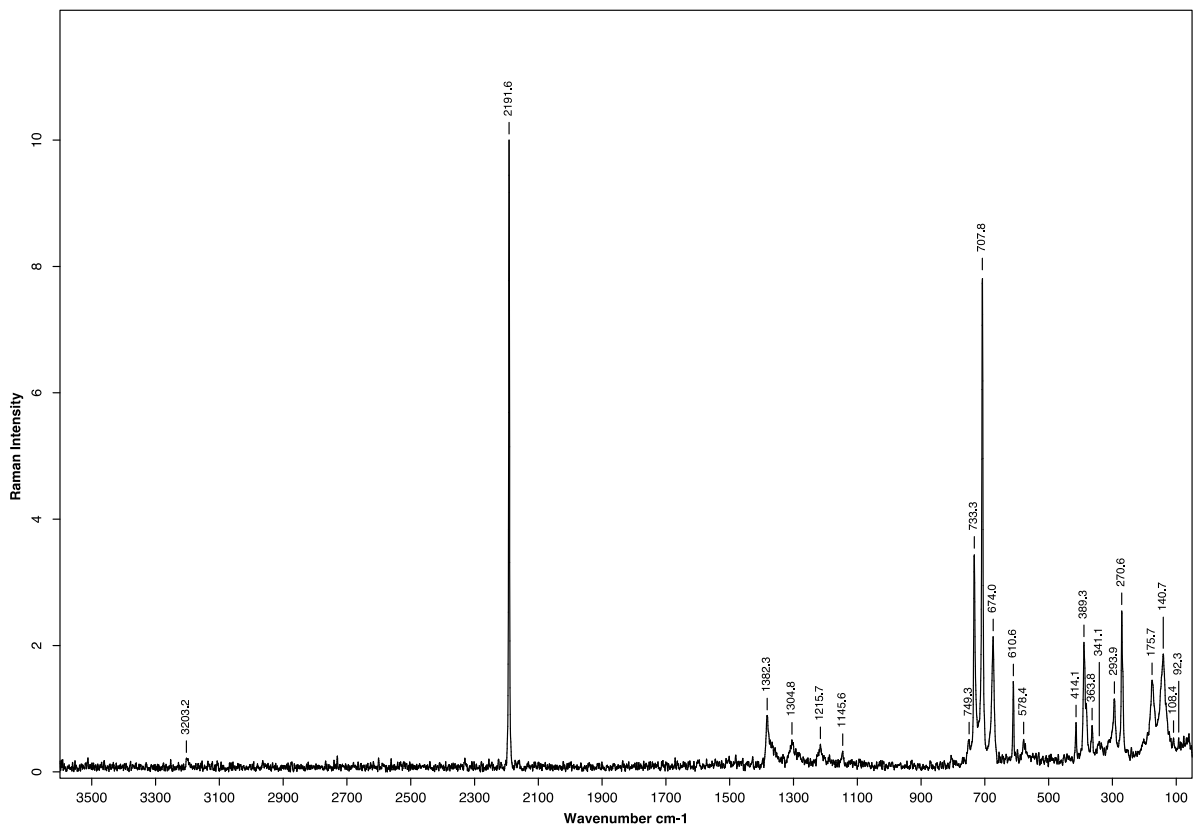

File Name: TS221.1



**HCN·SbF<sub>5</sub>****TS244**

off white solid, 9 mm FEP tube, -90°C

11/16/2016 10:17:51 AM

1740 Scans 2 cm-1 350 mW

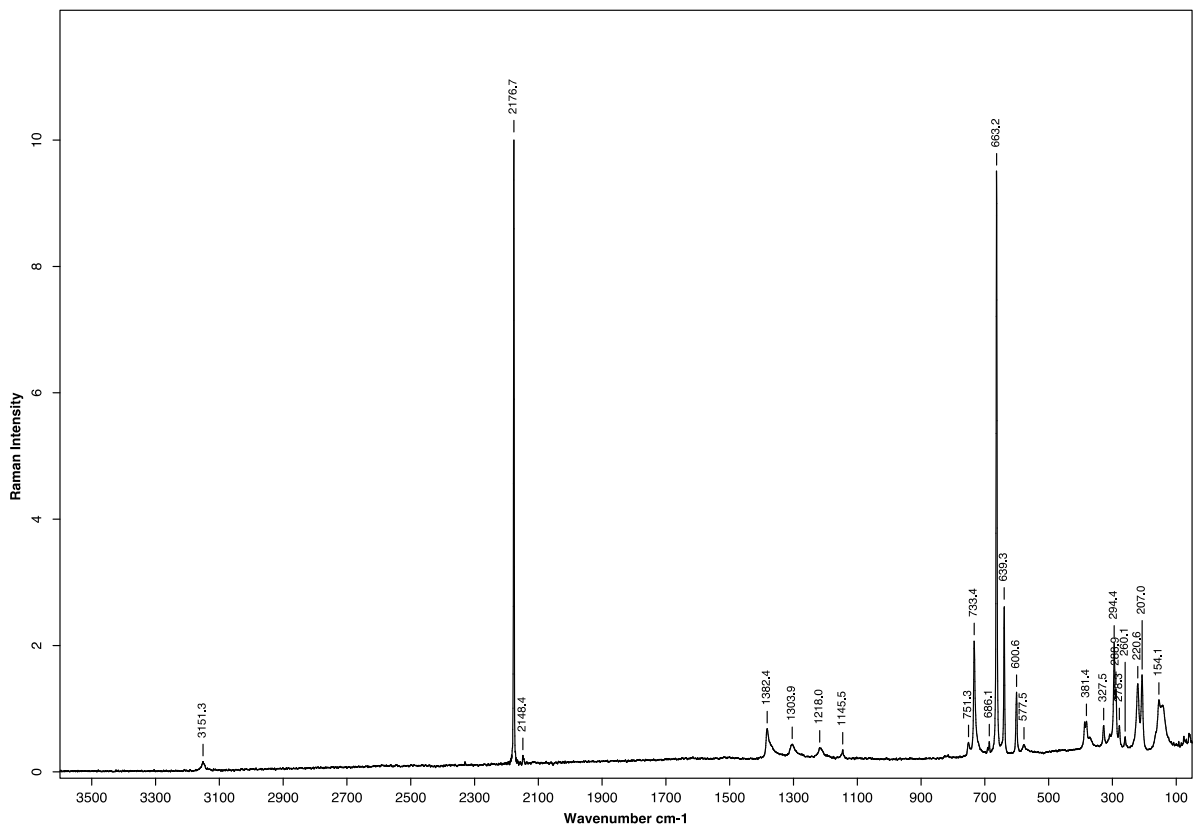

File Name: TS244.0

NCCH<sub>2</sub>CN

ref\_Malononitrile

colorless crystals, 5 mm NMR tube, r.t.

10/7/2016 9:16:52 AM

1000 Scans 2 cm-1 100 mW

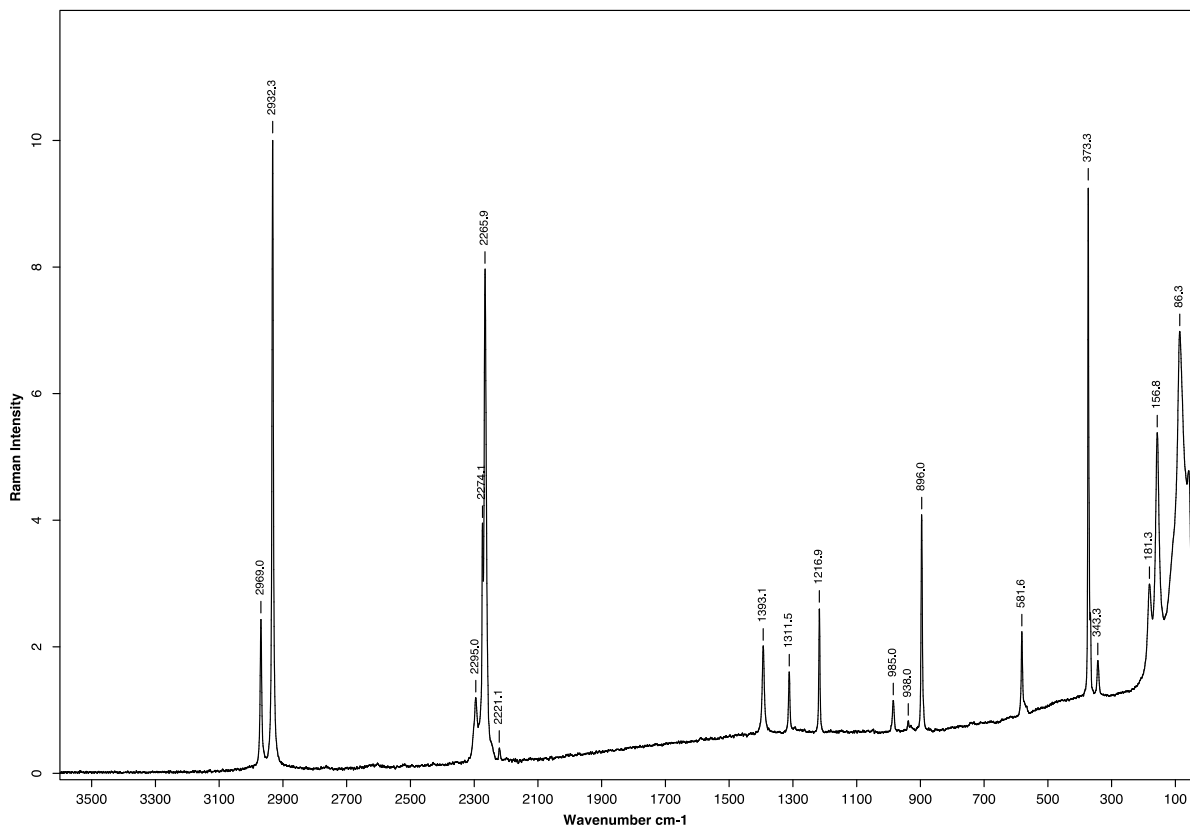

File Name: ref\_Malononitrile.0

**NCCH<sub>2</sub>CN•AsF<sub>5</sub>****TS230**

pale orange solid, 9 mm FEP, -90°C

10/26/2016 4:45:35 AM

500 Scans 2 cm<sup>-1</sup> 350 mW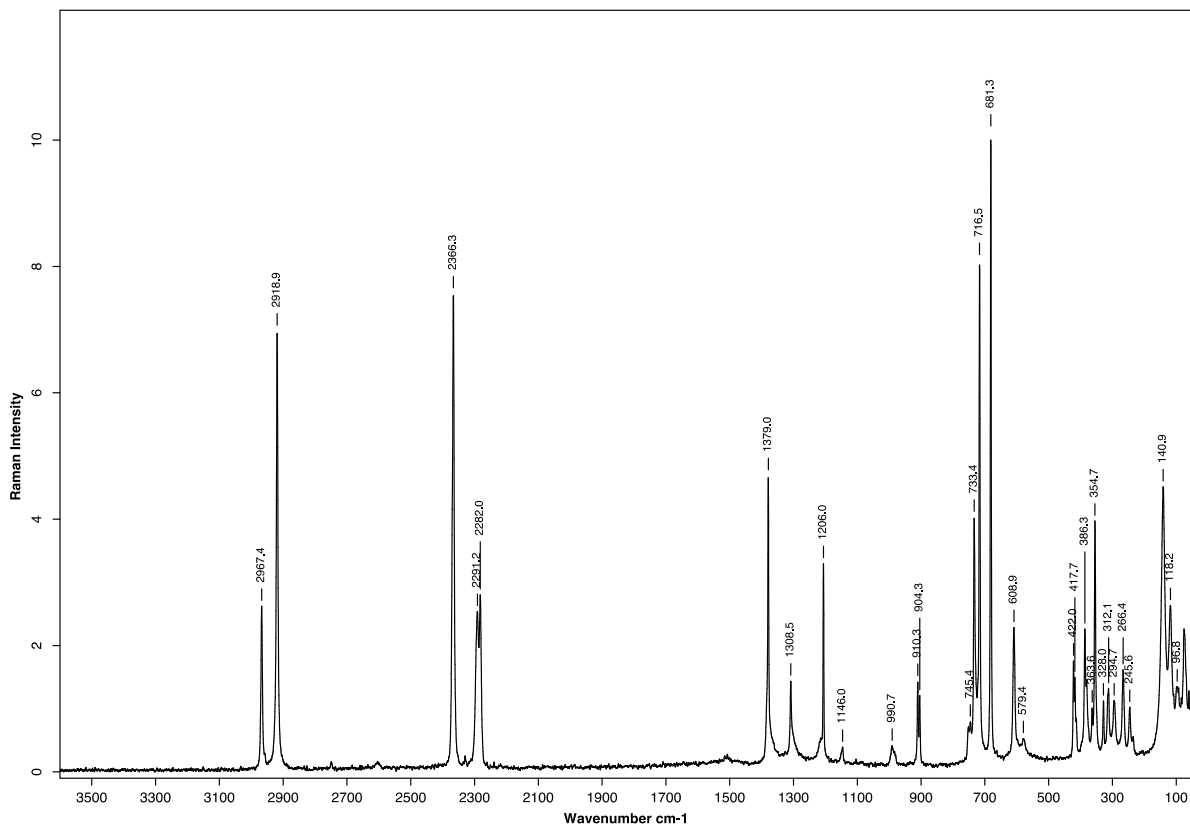

File Name: TS230.0

**NCCH<sub>2</sub>CN•SbF<sub>5</sub>****TS225**

white solid, 9 mm FEP tube, -90°C

10/17/2016 11:36:33 AM

1501 Scans 2 cm-1 350 mW

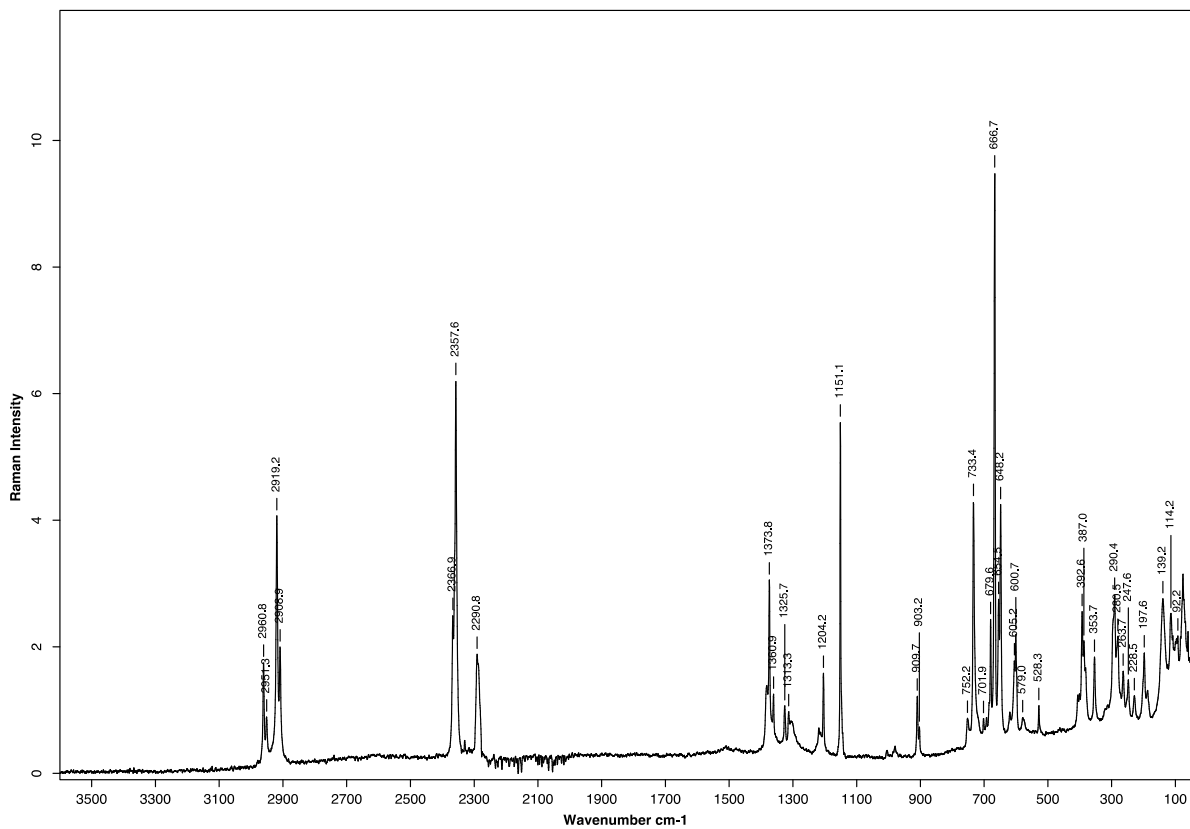

File Name: TS225.1

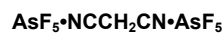

TS223

white solid, 9 mm FEP tube, -90°C

10/13/2016 6:15:23 PM

25 Scans 2 cm-1 350 mW

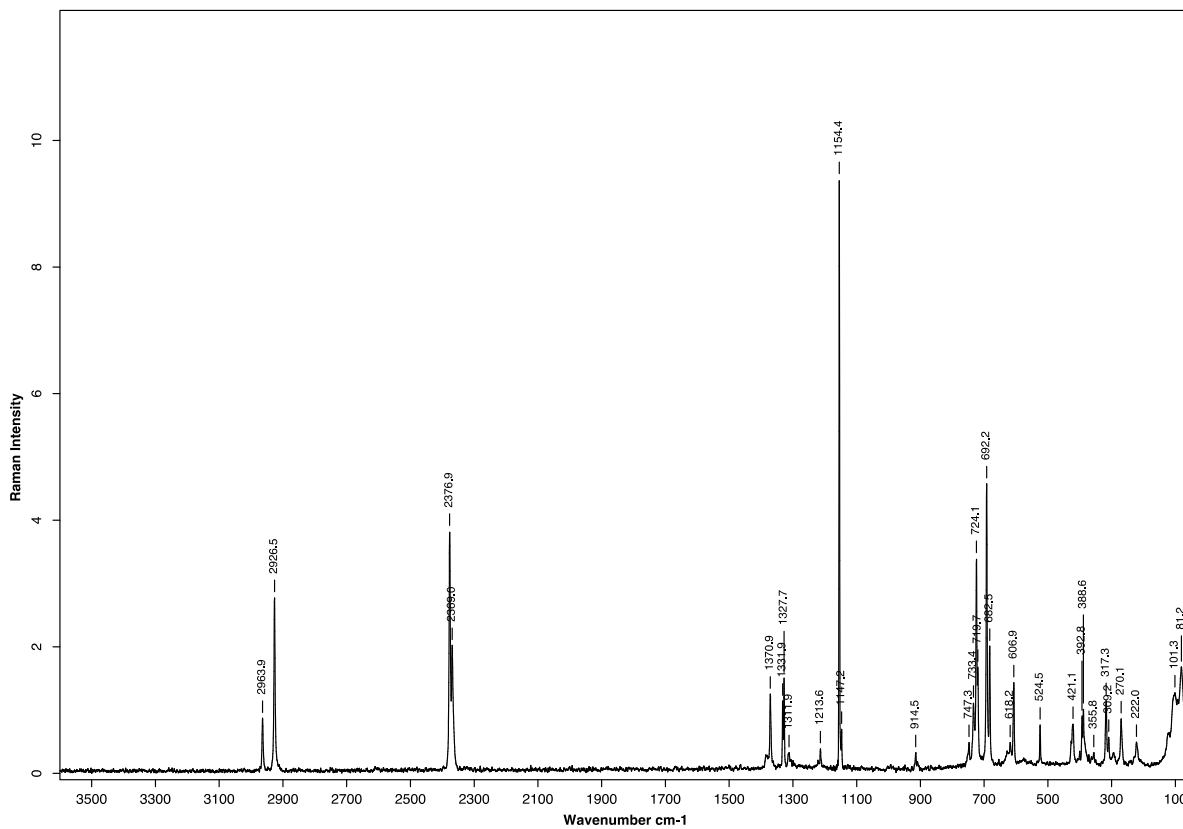

File Name: TS223.1

**SbF<sub>5</sub>·NCCH<sub>2</sub>CN·SbF<sub>5</sub>****TS258**

colorless solid, 9mm FEP, -90°C

11/26/2016 11:34:05 AM

1502 Scans 2 cm-1 350 mW

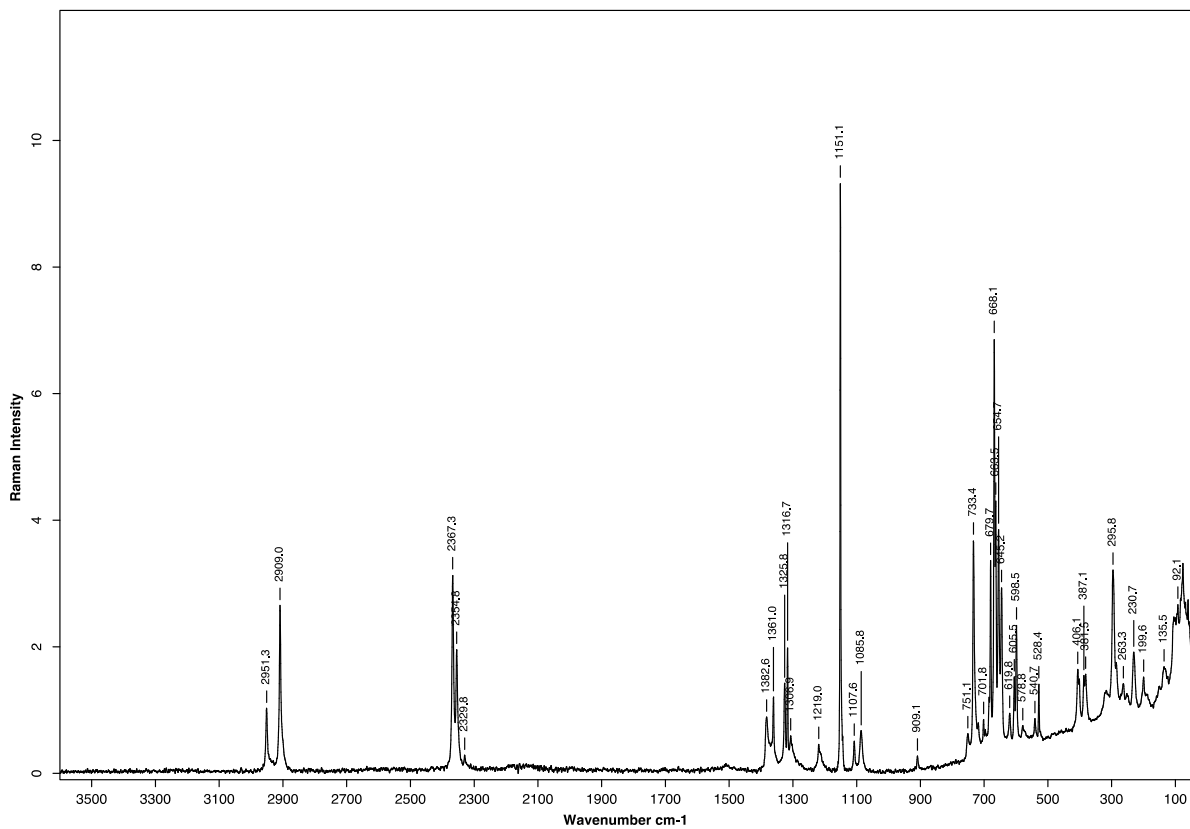

File Name: TS258.1

$C_3H_7CN$ 

ref\_Butanenitrile

colorless liquid, 5 mm NMR tube, r.t.

6/6/2017 3:18:33 PM

2000 Scans 4 cm-1 100 mW

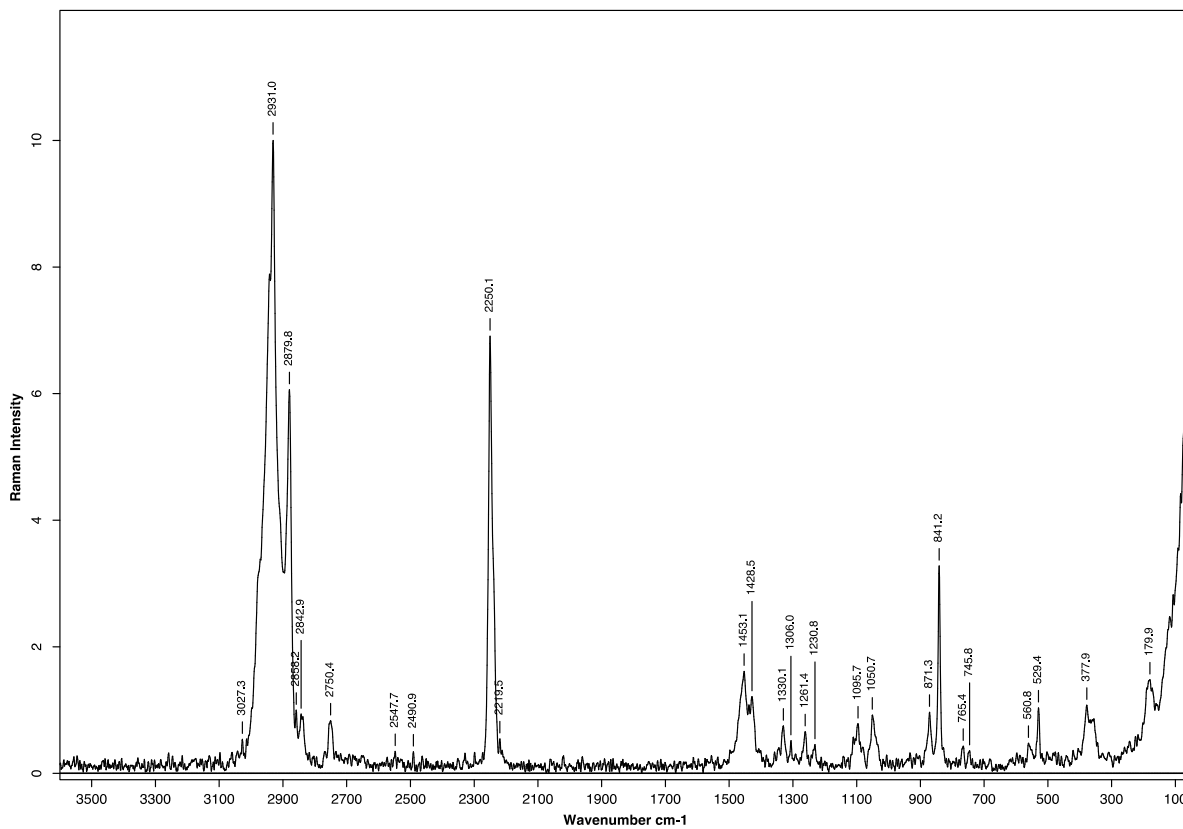

File Name: ref\_Butanenitrile.1

$C_3H_7CN \cdot AsF_5$ 

TS410

colorless solid, 9 mm FEP, -90°C

4/6/2018 12:31:14 PM

2000 Scans 4 cm-1 350 mW

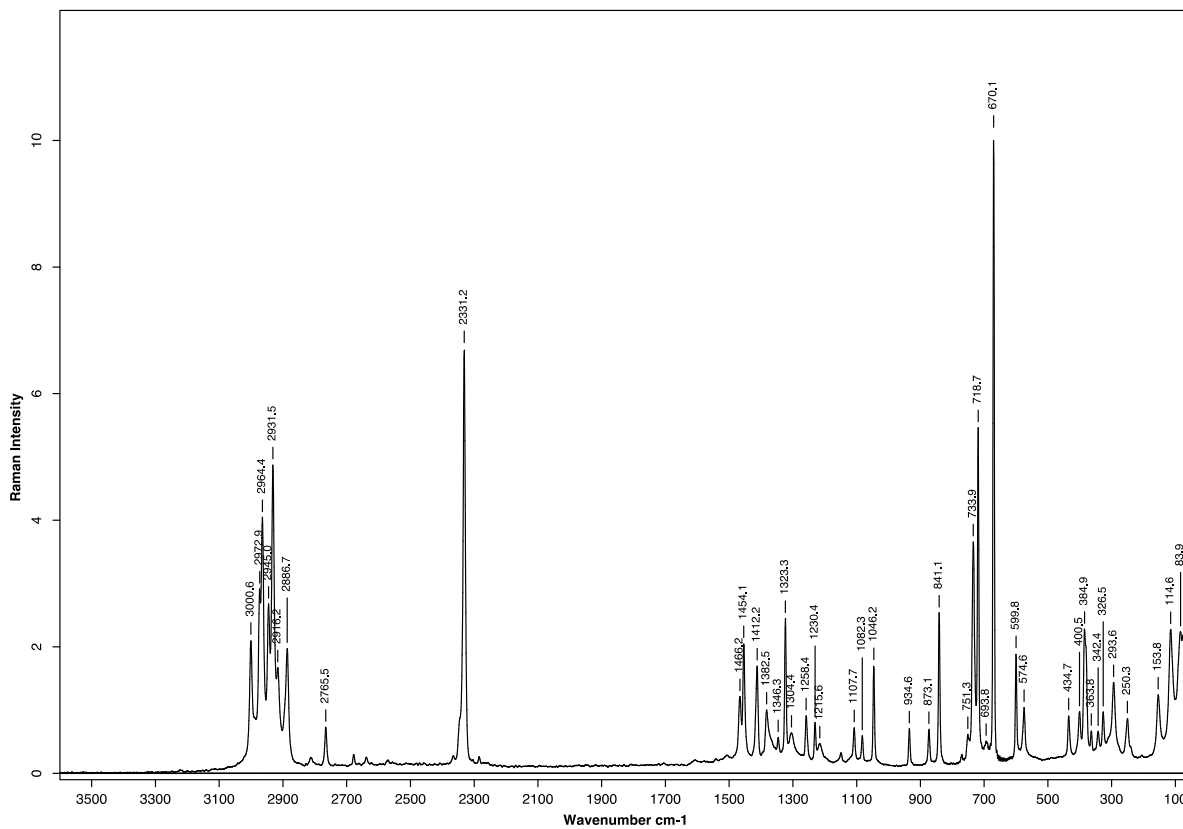

File Name: TS410.1



$C_3H_7CN \cdot SbF_6$ 

TS404

4/3/2018 11:04:24 AM

colorless solid, 9 mm FEP, -90°C

1000 Scans 4 cm-1 350 mW

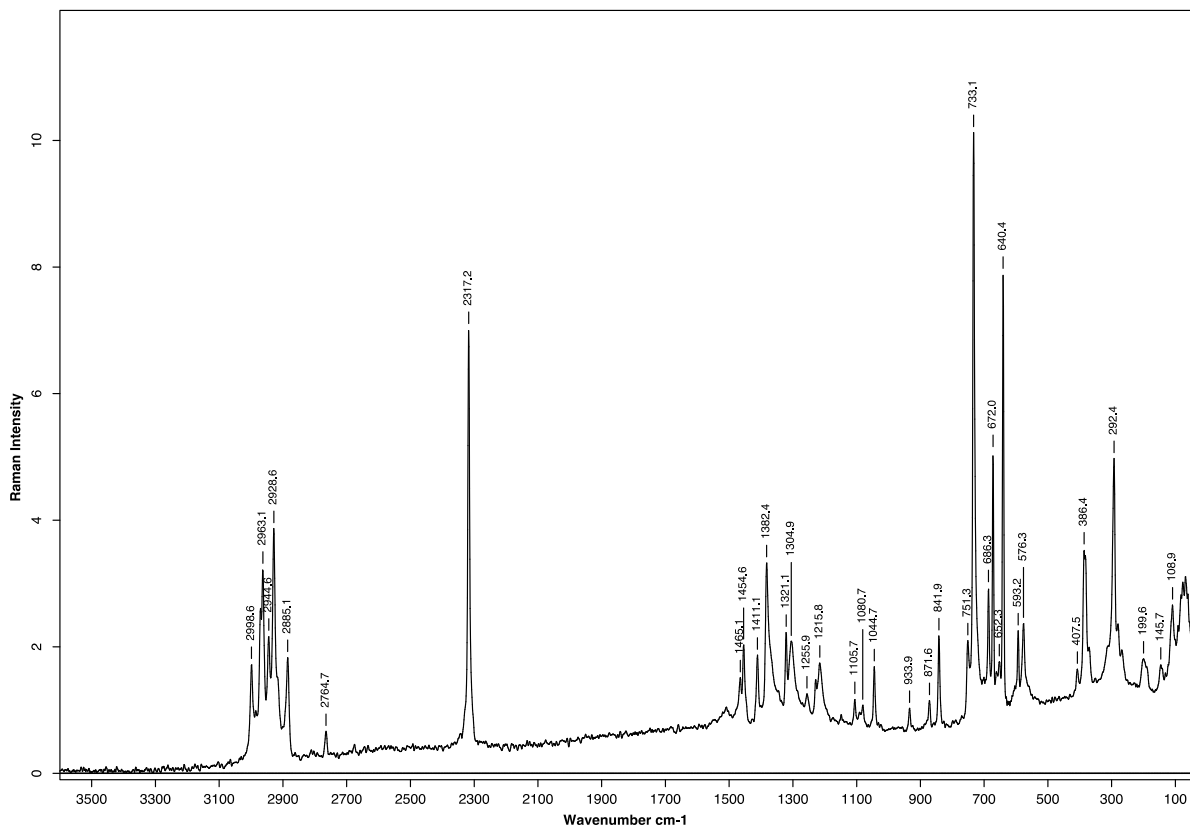

File Name: TS404.1

cyclo-C<sub>3</sub>H<sub>5</sub>CN

ref\_cyclopropanecarbonitrile

colorless crystalline solid, r.t.

11/17/2017 5:34:14 PM

1000 Scans 4 cm<sup>-1</sup> 75 mW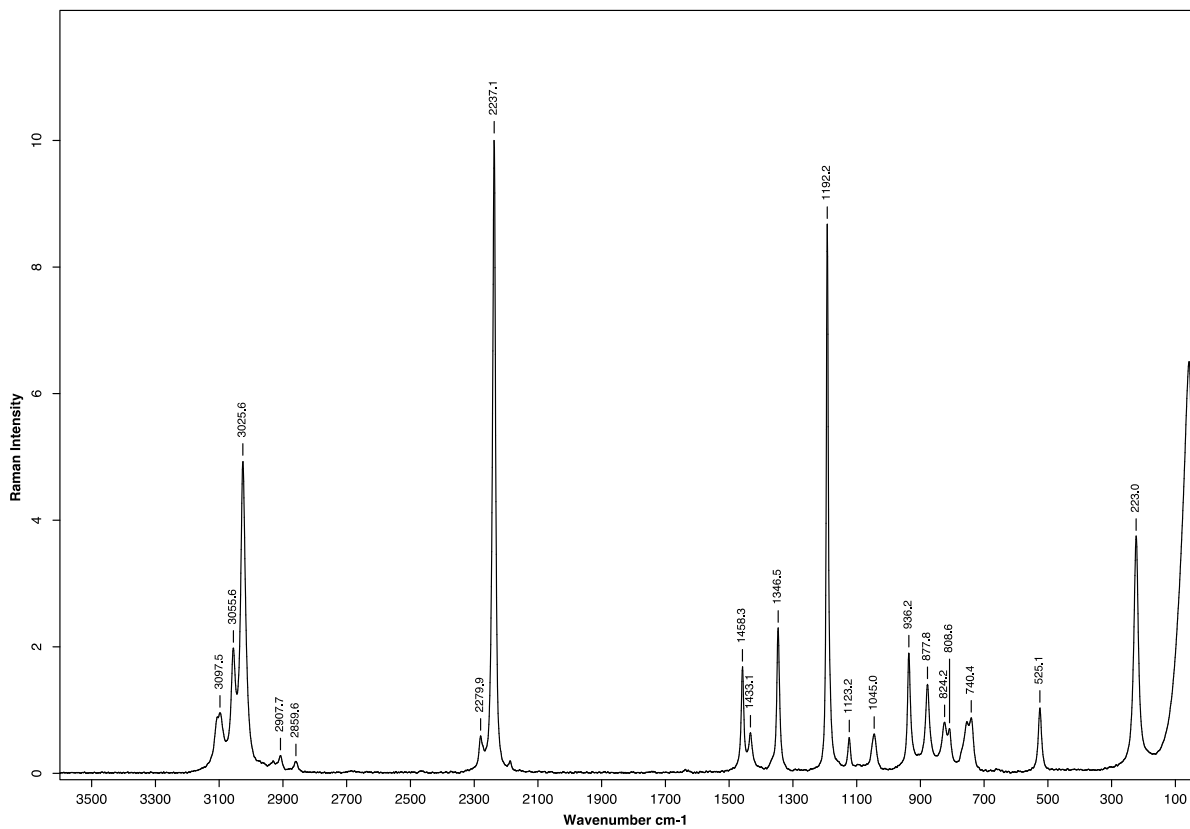

File Name: ref\_cyclopropanecarbonitrile.0

cyclo-C<sub>3</sub>H<sub>5</sub>CN•AsF<sub>5</sub>

TS409

4/5/2018 12:59:53 PM

colorless solid, 9 mm FEP, -90°C

2000 Scans 4 cm-1 350 mW

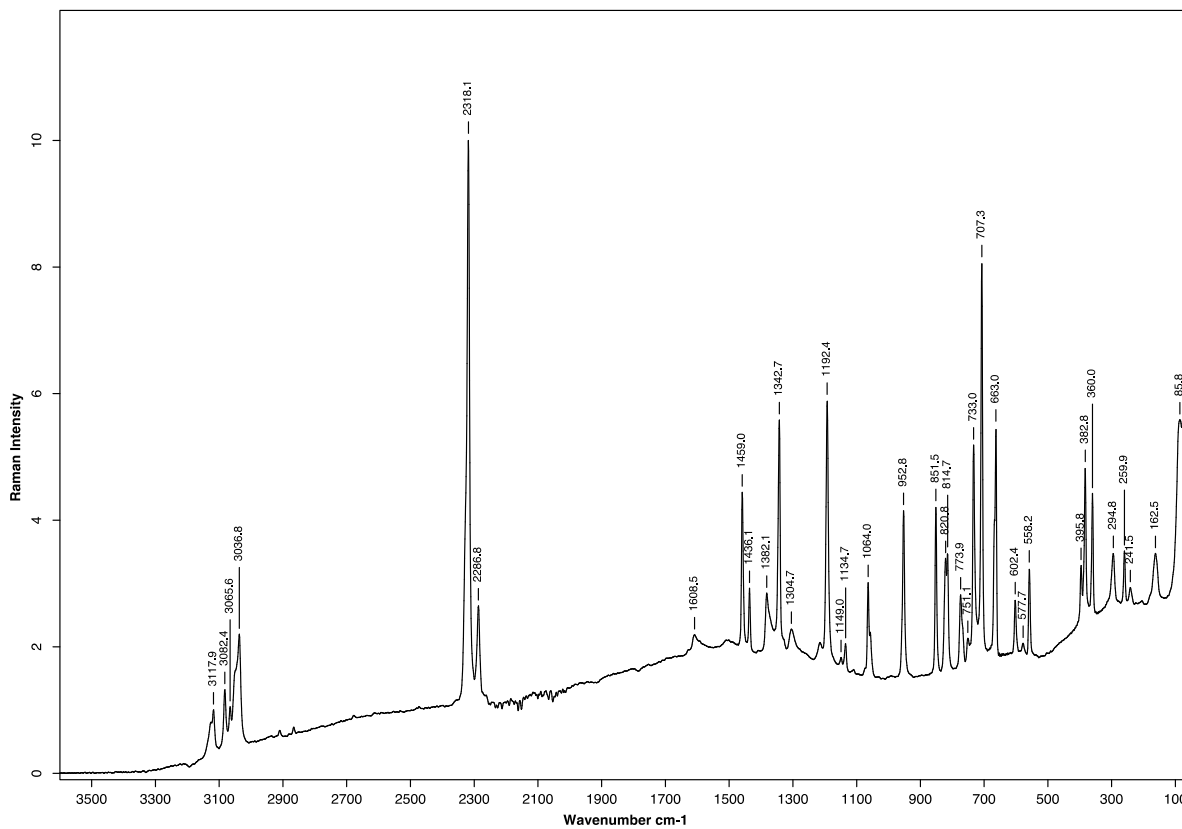

File Name: TS409.1

cyclo-C<sub>3</sub>H<sub>5</sub>CN•SbF<sub>5</sub>

TS405

pale orange solid, 9 mm FEP, -90°C

4/3/2018 12:40:13 PM

200 Scans 4 cm-1 350 mW

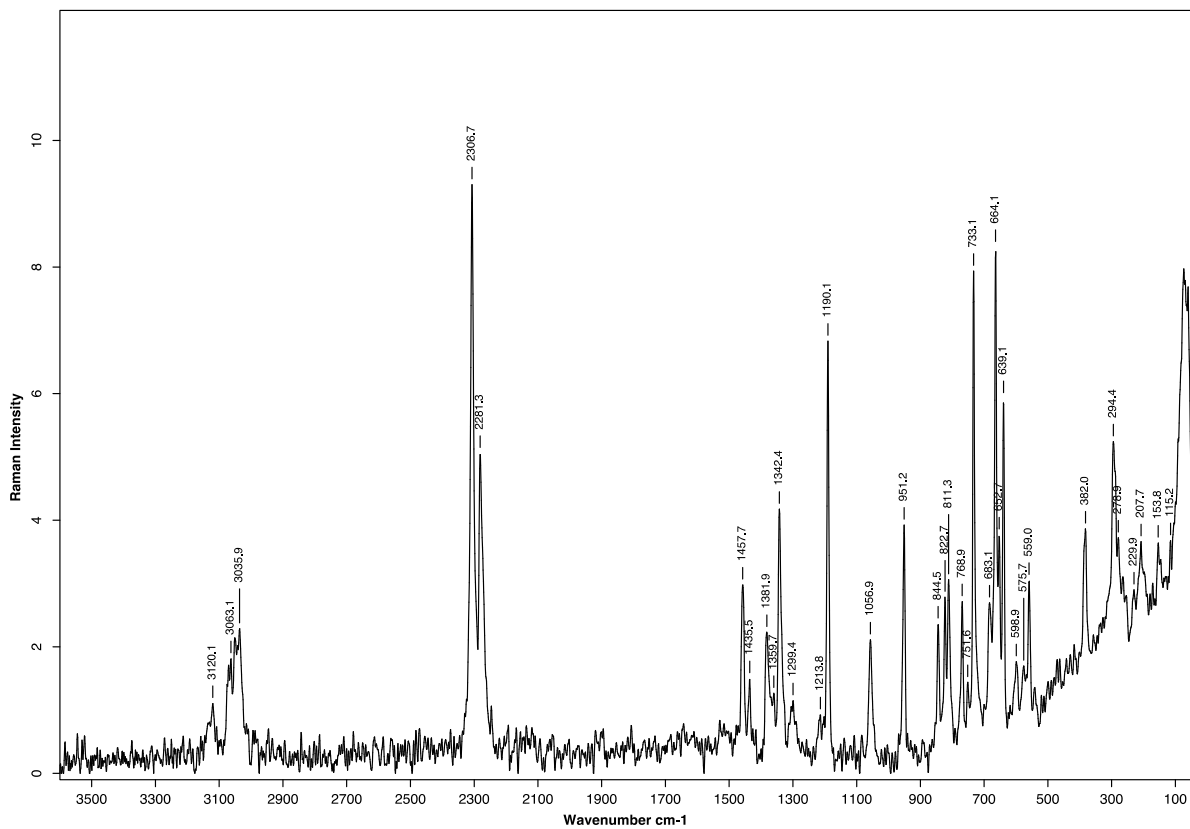

File Name: TS405.1

$(\text{CH}_3)_3\text{CCN}$ 

ref\_Trimethylacetonitrile

colorless crystalline solid, r.t.

11/18/2017 1:45:13 PM

1000 Scans 4 cm-1 75 mW

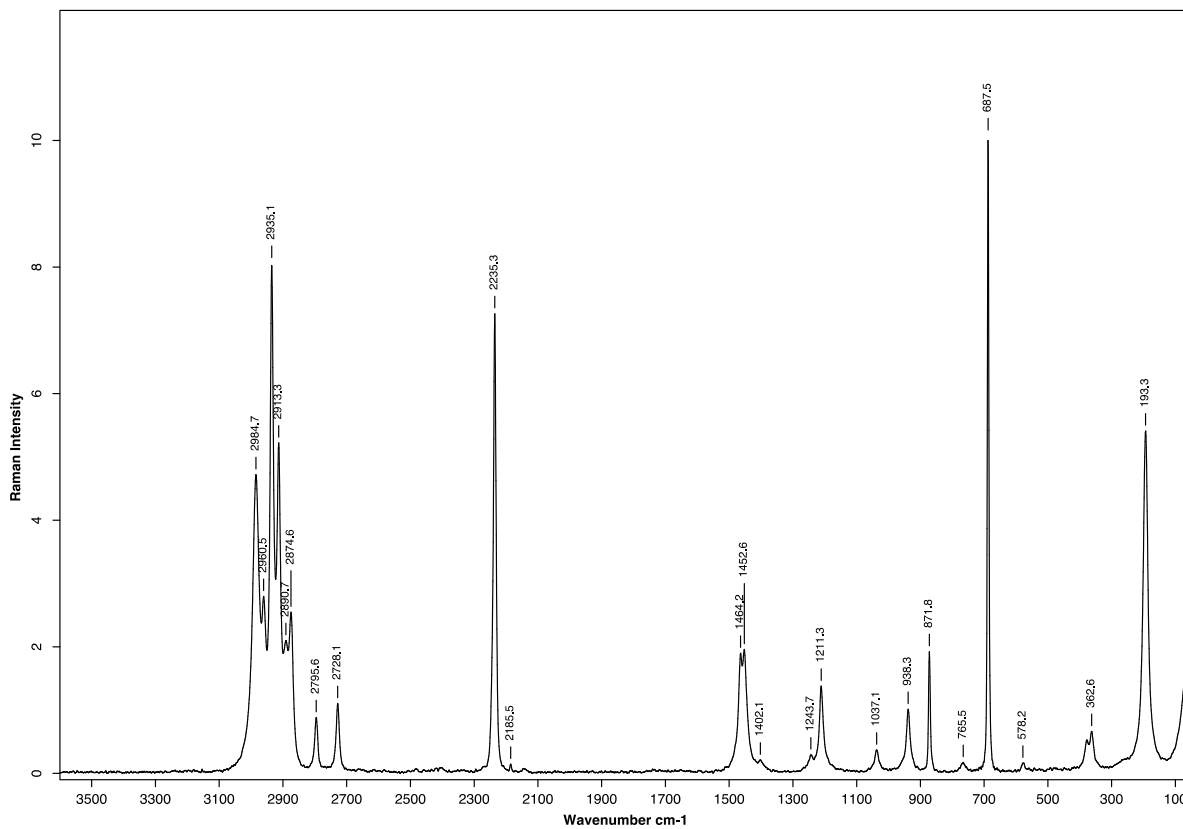

File Name: ref\_Trimethylacetonitrile.0

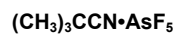

TS408

colorless solid, 9 mm FEP, -90°C

4/5/2018 11:56:40 AM

1000 Scans 4 cm-1 350 mW

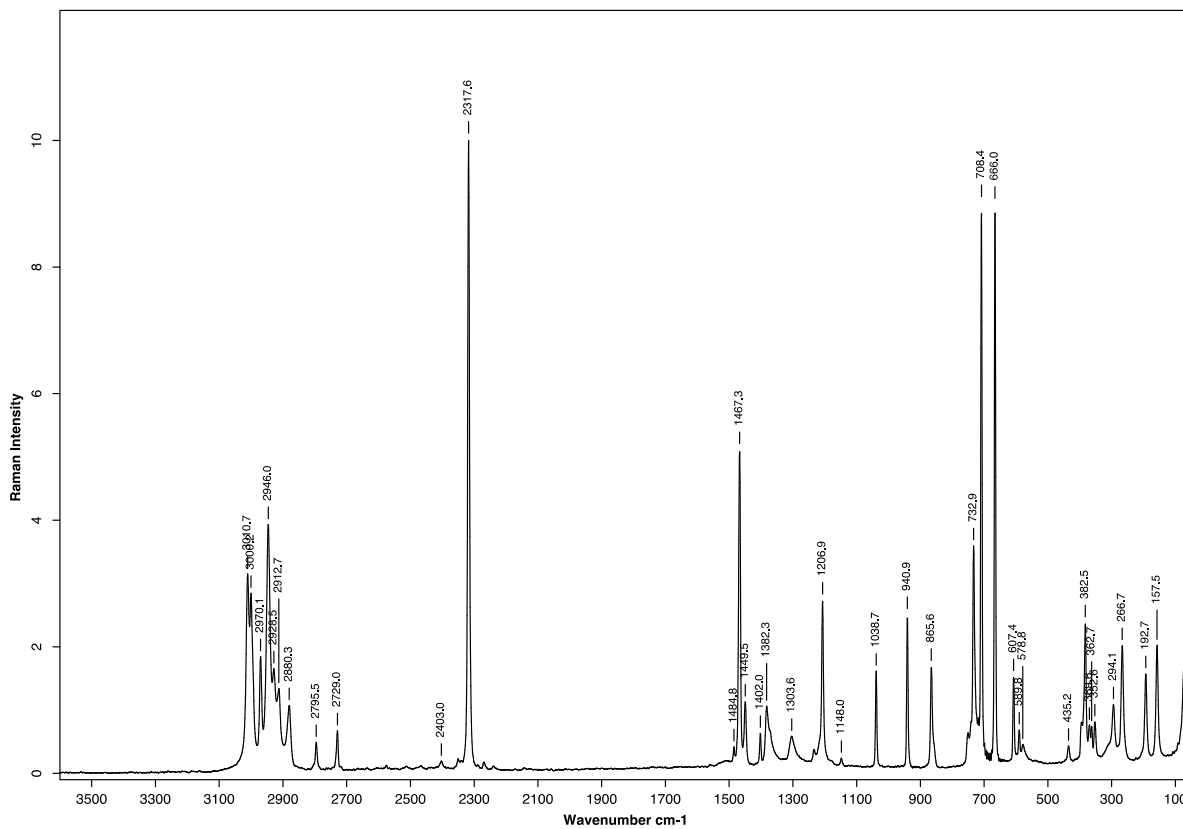

File Name: TS408.1

$(\text{CH}_3)_3\text{CCN}\cdot\text{SbF}_5$ 

TS402

colorless solid, 9 mm FEP, -90°C

3/30/2018 3:20:31 PM

1801 Scans 4 cm-1 350 mW

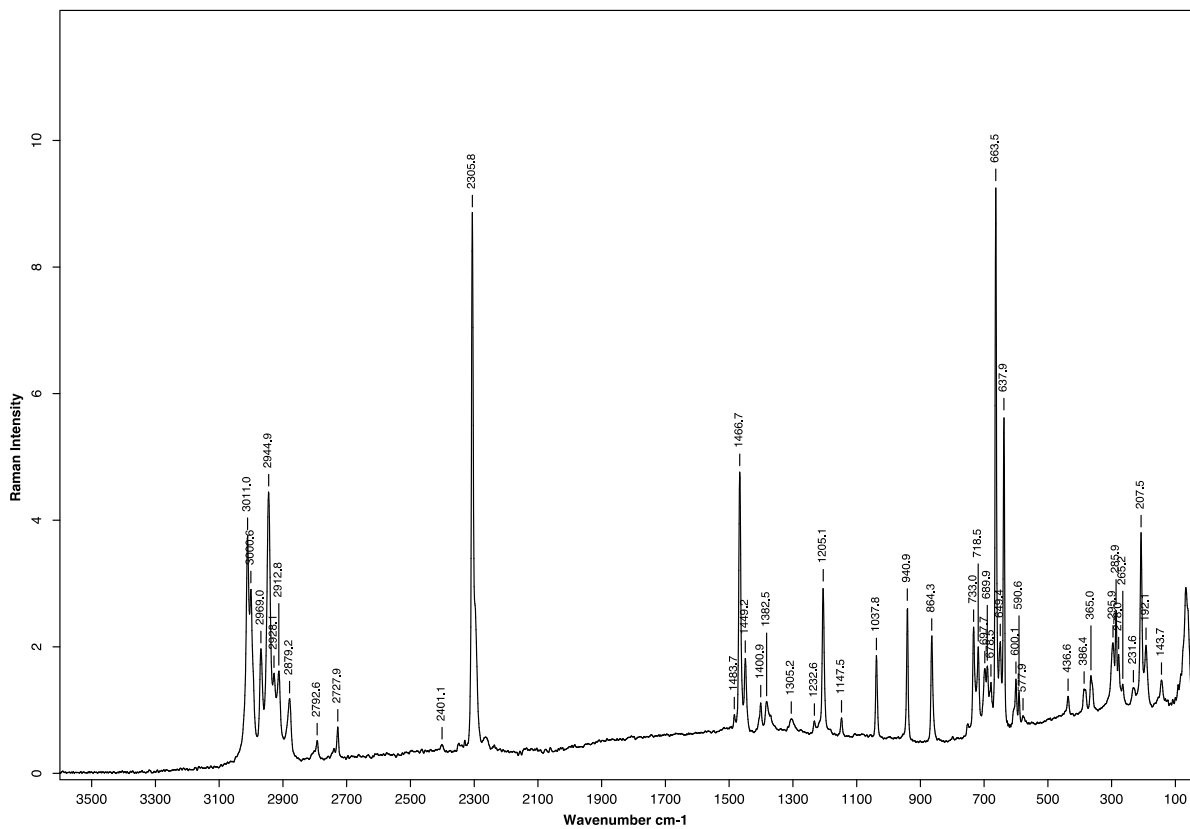

File Name: TS402.0

$C_6H_5CN$ 

ref\_Benzonitrile

colorless liquid, 5 mm NMR tube, r.t.

6/6/2017 7:28:04 PM

2000 Scans 4 cm-1 100 mW

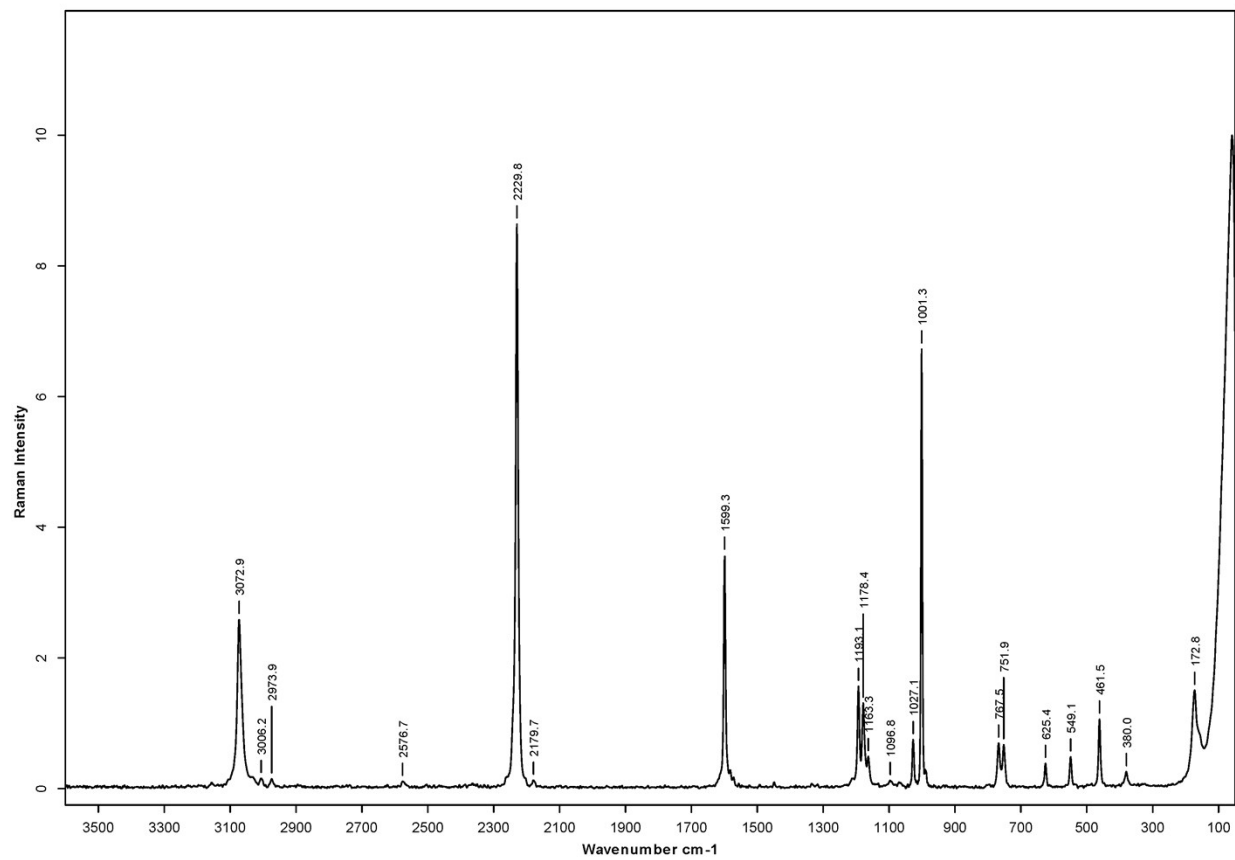



$C_6H_5CN \cdot AsF_5$ 

TS439

colorless solid, 9 mm FEP tube, -90°C

7/10/2018 9:50:53 AM

500 Scans 4 cm<sup>-1</sup> 350 mW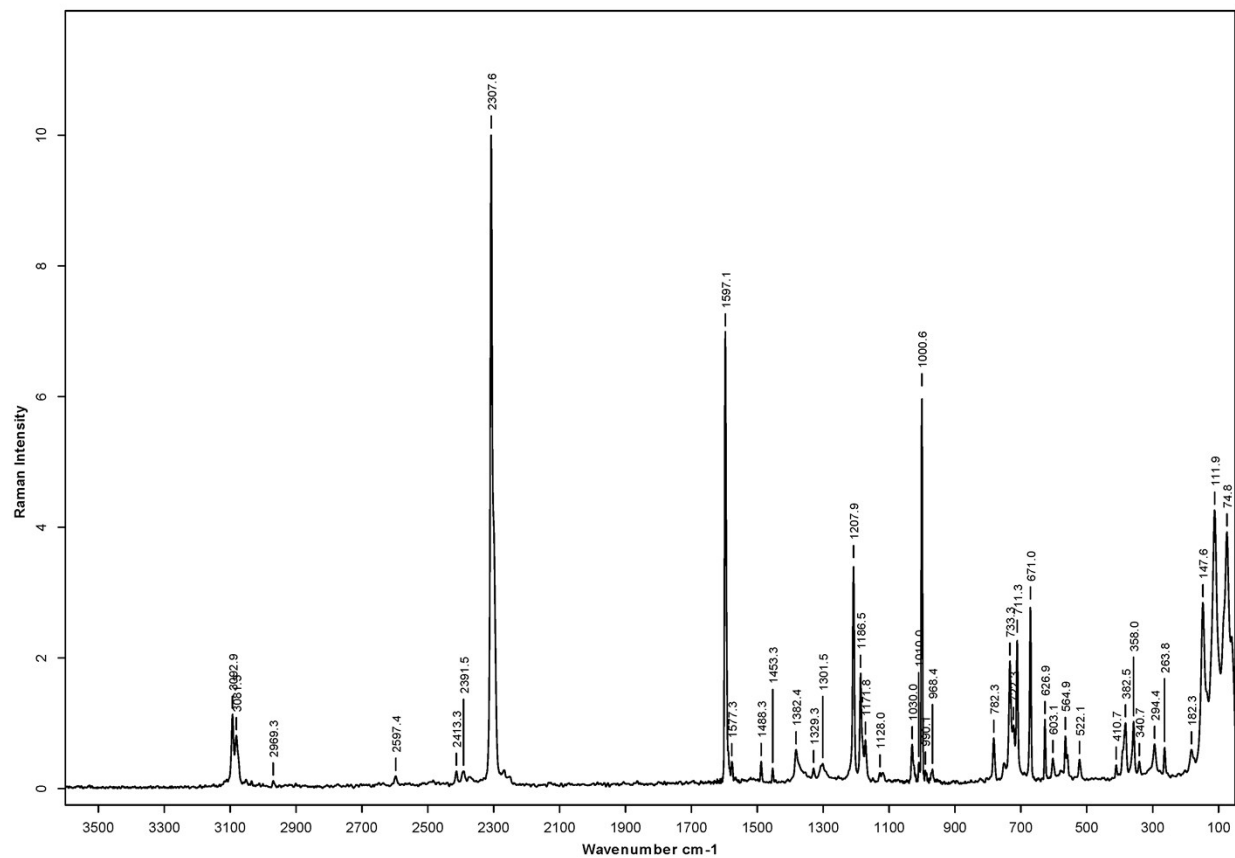

$C_6H_5CN \cdot SbF_5$ 

TS440

pale yellow solid, 9 mm FEP tube, -90°C

7/10/2018 10:10:40 AM

500 Scans 4 cm<sup>-1</sup> 350 mW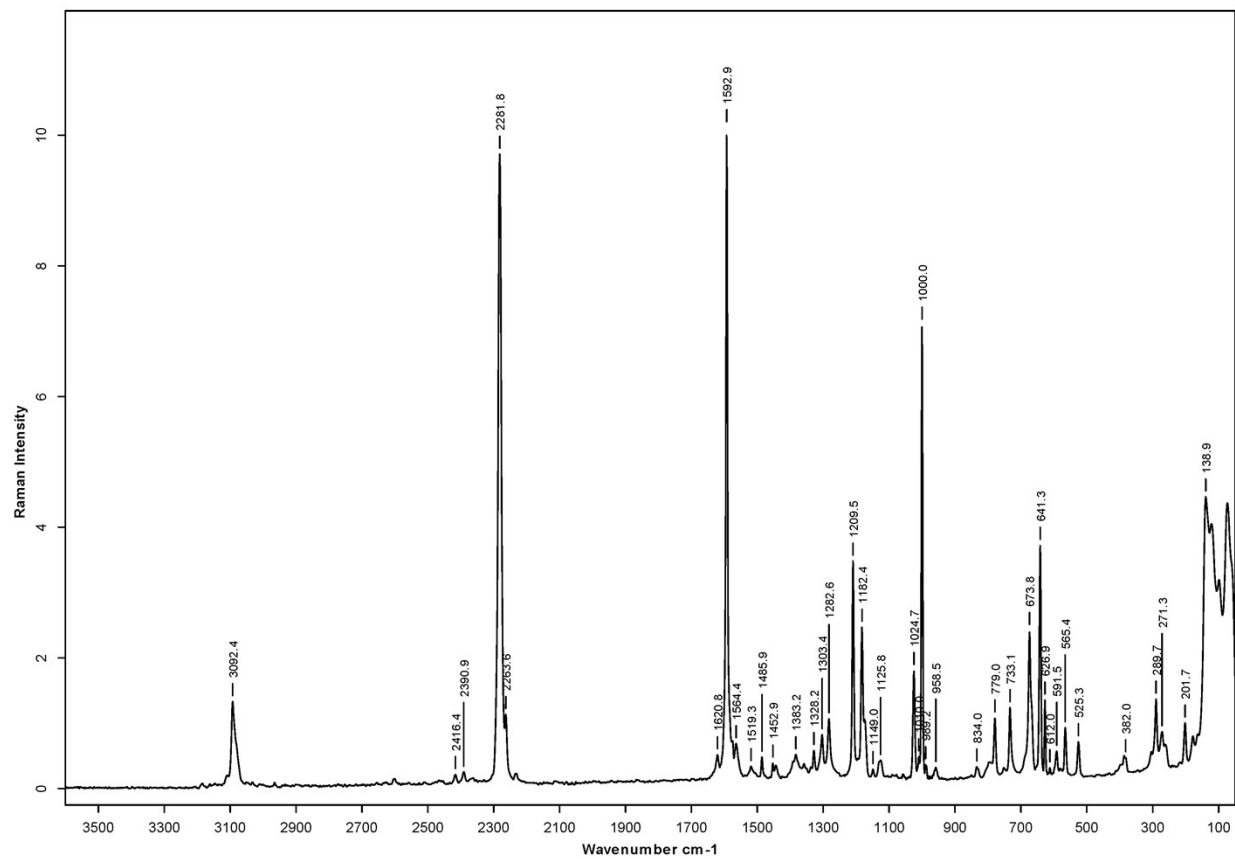

## FEP

rFEP\_tube\_9mm

1/23/2016 1:07:46 PM

empty 9mm FEP tube

5000 Scans 4 cm<sup>-1</sup> 100 mW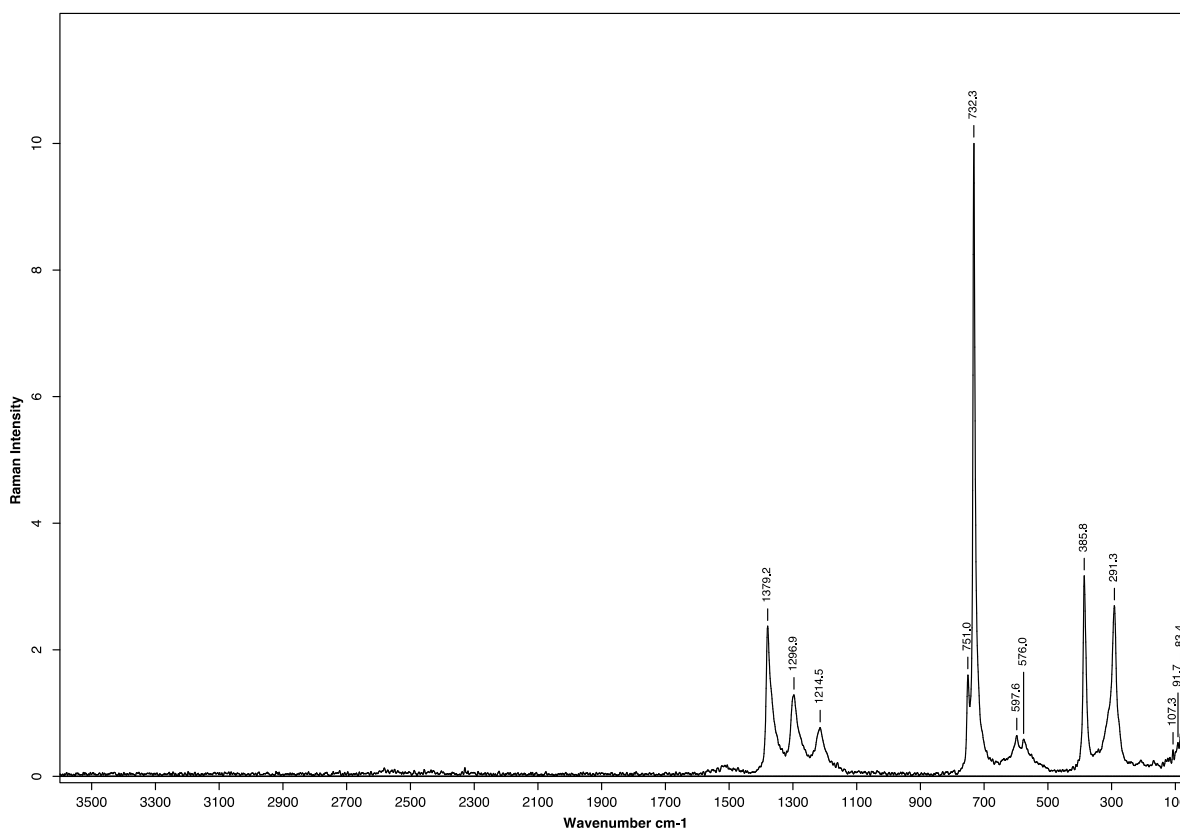

File Name: rFEP\_tube\_9mm.0

Table S2-1. Comparison of CN stretching vibration frequencies of the Lewis adducts and the free nitriles.

| Compound                                                | $\nu(\text{CN}) / \text{cm}^{-1}$ |        |
|---------------------------------------------------------|-----------------------------------|--------|
|                                                         | RCN•MF <sub>5</sub>               | RCN    |
| HCN•AsF <sub>5</sub>                                    | 2191.6                            | 2097.9 |
| HCN•SbF <sub>5</sub>                                    | 2176.7                            |        |
| NCCH <sub>2</sub> CN•AsF <sub>5</sub>                   | 2366.3 (2282.0) <sup>a</sup>      | 2265.9 |
| NCCH <sub>2</sub> CN•SbF <sub>5</sub>                   | 2357.6 (2290.8) <sup>a</sup>      |        |
| C <sub>3</sub> H <sub>7</sub> CN•AsF <sub>5</sub>       | 2331.2                            | 2250.1 |
| C <sub>3</sub> H <sub>7</sub> CN•SbF <sub>5</sub>       | 2317.2                            |        |
| c-C <sub>3</sub> H <sub>5</sub> CN•AsF <sub>5</sub>     | 2318.1                            | 2237.1 |
| c-C <sub>3</sub> H <sub>5</sub> CN•SbF <sub>5</sub>     | 2306.7                            |        |
| (CH <sub>3</sub> ) <sub>3</sub> CCN•AsF <sub>5</sub>    | 2317.6                            | 2235.3 |
| (CH <sub>3</sub> ) <sub>3</sub> CCN•SbF <sub>5</sub>    | 2305.8                            |        |
| C <sub>6</sub> H <sub>5</sub> CN•AsF <sub>5</sub>       | 2307.6                            | 2229.8 |
| C <sub>6</sub> H <sub>5</sub> CN•SbF <sub>5</sub>       | 2281.8                            |        |
| AsF <sub>5</sub> •NCCH <sub>2</sub> CN•AsF <sub>5</sub> | 2376.9                            | 2265.9 |
| SbF <sub>5</sub> •NCCH <sub>2</sub> CN•SbF <sub>5</sub> | 2367.3                            |        |

(a) stretching frequency of non-coordinating cyano group in parenthesis.

## Crystallographic Details

HCN•AsF<sub>5</sub>

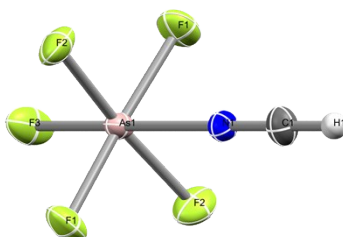

Figure S1-1. Molecular unit of HCN•AsF<sub>5</sub>. View along the 100 direction.

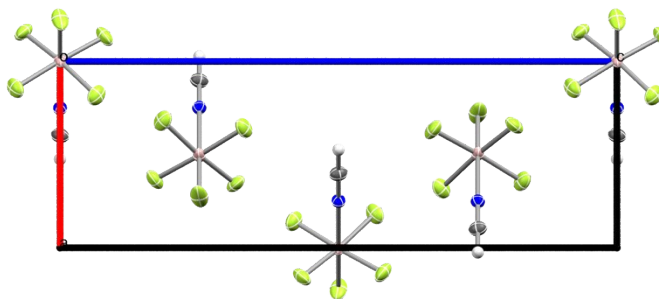

Figure S2-1. Packing of HCN•AsF<sub>5</sub>. View along the 010 direction.

Table S1-1. Sample and crystal data for HCN•AsF<sub>5</sub>.

|                        |                          |         |
|------------------------|--------------------------|---------|
| Identification code    | AsF <sub>5</sub> HCN     |         |
| Chemical formula       | CHAsF <sub>5</sub> N     |         |
| Formula weight         | 196.95 g/mol             |         |
| Temperature            | 100(2) K                 |         |
| Wavelength             | 0.71073 Å                |         |
| Crystal size           | 0.176 x 0.232 x 0.338 mm |         |
| Crystal habit          | colorless block          |         |
| Crystal system         | Tetragonal               |         |
| Space group            | P 21 21 2                |         |
| Unit cell dimensions   | a = 5.4973(15) Å         | α = 90° |
|                        | b = 5.4973(15) Å         | β = 90° |
|                        | c = 16.475(5) Å          | γ = 90° |
| Volume                 | 497.9(3) Å <sup>3</sup>  |         |
| Z                      | 4                        |         |
| Density (calculated)   | 2.628 g/cm <sup>3</sup>  |         |
| Absorption coefficient | 6.836 mm <sup>-1</sup>   |         |
| F(000)                 | 368                      |         |

**Table S2-1. Data collection and structure refinement for HCN•AsF<sub>5</sub>.**

|                                     |                                                                                                                         |                           |  |
|-------------------------------------|-------------------------------------------------------------------------------------------------------------------------|---------------------------|--|
| Diffractometer                      | Bruker APEX DUO                                                                                                         |                           |  |
| Radiation source                    | fine-focus tube, MoK $\alpha$                                                                                           |                           |  |
| Theta range for data collection     | 3.91 to 30.57°                                                                                                          |                           |  |
| Index ranges                        | -7<=h<=7, -7<=k<=7, -23<=l<=23                                                                                          |                           |  |
| Reflections collected               | 12048                                                                                                                   |                           |  |
| Independent reflections             | 762 [R(int) = 0.0400]                                                                                                   |                           |  |
| Coverage of independent reflections | 100.0%                                                                                                                  |                           |  |
| Absorption correction               | multi-scan                                                                                                              |                           |  |
| Max. and min. transmission          | 0.3780 and 0.2060                                                                                                       |                           |  |
| Structure solution technique        | direct methods                                                                                                          |                           |  |
| Structure solution program          | SHELXTL XT 2014/5 (Bruker AXS, 2014)                                                                                    |                           |  |
| Refinement method                   | Full-matrix least-squares on F <sup>2</sup>                                                                             |                           |  |
| Refinement program                  | SHELXTL XL 2014/7 (Bruker AXS, 2014)                                                                                    |                           |  |
| Function minimized                  | $\Sigma w(F_o^2 - F_c^2)^2$                                                                                             |                           |  |
| Data / restraints / parameters      | 762 / 1 / 41                                                                                                            |                           |  |
| Goodness-of-fit on F <sup>2</sup>   | 1.195                                                                                                                   |                           |  |
| Final R indices                     | 673 data; I>2 $\sigma$ (I)                                                                                              | R1 = 0.0246, wR2 = 0.0552 |  |
|                                     | all data                                                                                                                | R1 = 0.0288, wR2 = 0.0567 |  |
| Weighting scheme                    | w=1/[ $\sigma^2(F_o^2)+(0.0167P)^2+0.5235P$ ]<br>where P=(F <sub>o</sub> <sup>2</sup> +2F <sub>c</sub> <sup>2</sup> )/3 |                           |  |
| Largest diff. peak and hole         | 0.329 and -0.472 eÅ <sup>-3</sup>                                                                                       |                           |  |
| R.M.S. deviation from mean          | 0.089 eÅ <sup>-3</sup>                                                                                                  |                           |  |

**Table S3-1. Atomic coordinates and equivalent isotropic atomic displacement parameters (Å<sup>2</sup>) for HCN•AsF<sub>5</sub>.**

U(eq) is defined as one third of the trace of the orthogonalized U<sub>ij</sub> tensor.

|     | x/a        | y/b        | z/c         | U(eq)       |
|-----|------------|------------|-------------|-------------|
| C1  | 0.1026(5)  | 0.8974(5)  | 0.25        | 0.0236(8)   |
| As1 | 0.50372(5) | 0.49628(5) | 0.25        | 0.01659(13) |
| F1  | 0.3572(5)  | 0.3663(4)  | 0.33001(11) | 0.0318(4)   |
| F2  | 0.3184(4)  | 0.3431(4)  | 0.18455(11) | 0.0309(4)   |
| F3  | 0.7239(3)  | 0.2761(3)  | 0.25        | 0.0390(8)   |
| N1  | 0.2487(4)  | 0.7513(4)  | 0.25        | 0.0179(6)   |

**Table S4-1. Bond lengths (Å) for HCN•AsF<sub>5</sub>.**

|        |            |        |            |
|--------|------------|--------|------------|
| C1-N1  | 1.136(5)   | C1-H1  | 1.00(2)    |
| As1-F1 | 1.7020(17) | As1-F1 | 1.7021(17) |
| As1-F2 | 1.7058(18) | As1-F2 | 1.7058(18) |
| As1-F3 | 1.712(2)   | As1-N1 | 1.983(3)   |

**Table S5-1. Bond angles (°) for HCN•AsF<sub>5</sub>.**

|           |           |           |           |
|-----------|-----------|-----------|-----------|
| N1-C1-H1  | 180.0     | F1-As1-F1 | 175.7(2)  |
| F1-As1-F2 | 89.70(10) | F1-As1-F2 | 89.98(10) |
| F1-As1-F2 | 89.98(10) | F1-As1-F2 | 89.70(10) |

|           |            |           |           |
|-----------|------------|-----------|-----------|
| F2-As1-F2 | 171.60(17) | F1-As1-F3 | 92.17(10) |
| F1-As1-F3 | 92.17(10)  | F2-As1-F3 | 94.20(9)  |
| F2-As1-F3 | 94.20(9)   | F1-As1-N1 | 87.83(10) |
| F1-As1-N1 | 87.83(10)  | F2-As1-N1 | 85.80(9)  |
| F2-As1-N1 | 85.80(9)   | F3-As1-N1 | 180.00(2) |
| C1-N1-As1 | 180.0(2)   |           |           |

**Table S6-1. Anisotropic atomic displacement parameters ( $\text{\AA}^2$ ) for  $\text{HCN}\cdot\text{AsF}_5$ .**

The anisotropic atomic displacement factor exponent takes the form:  $-2\pi^2 [h^2 a^2 U_{11} + \dots + 2 h k a' b' U_{12}]$

|     | $U_{11}$    | $U_{22}$    | $U_{33}$    | $U_{23}$    | $U_{13}$    | $U_{12}$    |
|-----|-------------|-------------|-------------|-------------|-------------|-------------|
| C1  | 0.0202(11)  | 0.0202(11)  | 0.030(2)    | 0.0025(14)  | 0.0025(14)  | 0.0004(15)  |
| As1 | 0.01828(15) | 0.01828(15) | 0.01320(19) | 0.00090(10) | 0.00090(10) | 0.00657(12) |
| F1  | 0.0358(12)  | 0.0329(12)  | 0.0266(8)   | 0.0138(9)   | 0.0078(9)   | 0.0063(9)   |
| F2  | 0.0378(14)  | 0.0254(11)  | 0.0296(9)   | -0.0120(9)  | -0.0076(9)  | 0.0044(8)   |
| F3  | 0.0444(12)  | 0.0444(12)  | 0.0283(14)  | 0.0060(15)  | 0.0060(15)  | 0.0329(15)  |
| N1  | 0.0176(9)   | 0.0176(9)   | 0.0184(15)  | -0.0004(14) | -0.0004(14) | 0.0011(12)  |

**Table S7-1. Hydrogen atomic coordinates and isotropic atomic displacement parameters ( $\text{\AA}^2$ ) for  $\text{HCN}\cdot\text{AsF}_5$ .**

|    | x/a       | y/b      | z/c    | U(eq) |
|----|-----------|----------|--------|-------|
| H1 | -0.025(3) | 1.025(3) | 0.2500 | 0.028 |

$\text{HCN}\cdot\text{SbF}_5$

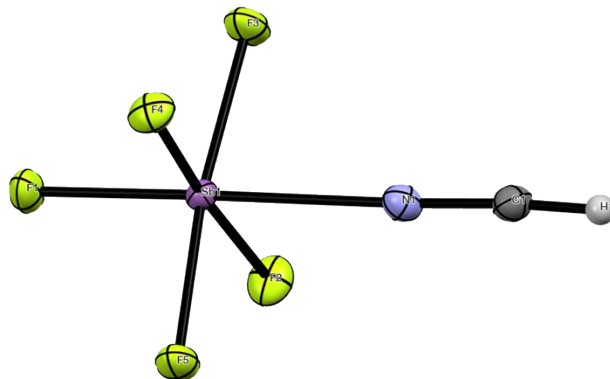

**Figure S1-3. Asymmetric unit of  $\text{HCN}\cdot\text{SbF}_5$ .**

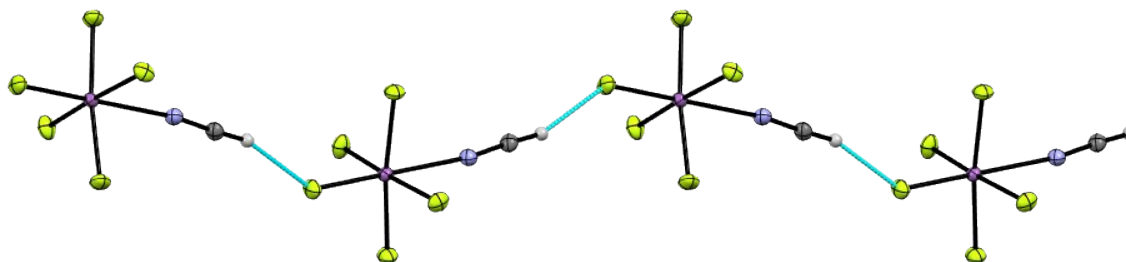

Figure S2-3. Hydrogen bonding in HCN•SbF<sub>5</sub>. View along the 001 direction.

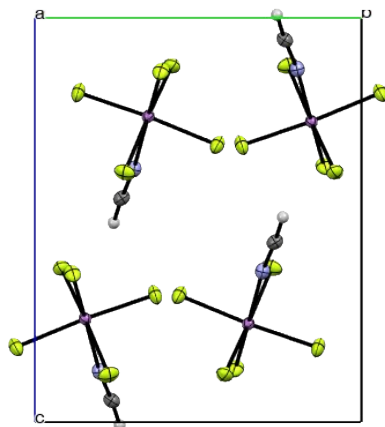

Figure S3-3. Packing of HCN•SbF<sub>5</sub> in the unit cell. View along the 010 direction.

**Table S1-3. Sample and crystal data for HCN•SbF<sub>5</sub>.**

|                        |                           |                |
|------------------------|---------------------------|----------------|
| Identification code    | HCNSbF <sub>5</sub>       |                |
| Chemical formula       | CHF <sub>5</sub> NSb      |                |
| Formula weight         | 243.78 g/mol              |                |
| Temperature            | 100(2) K                  |                |
| Wavelength             | 0.71073 Å                 |                |
| Crystal size           | 0.052 x 0.189 x 0.217 mm  |                |
| Crystal habit          | clear colorless plate     |                |
| Crystal system         | monoclinic                |                |
| Space group            | P 1 21/c 1                |                |
| Unit cell dimensions   | a = 6.2721(13) Å          | α = 90°        |
|                        | b = 8.1472(17) Å          | β = 95.375(4)° |
|                        | c = 10.157(2) Å           | γ = 90°        |
| Volume                 | 516.74(19) Å <sup>3</sup> |                |
| Z                      | 4                         |                |
| Density (calculated)   | 3.134 g/cm <sup>3</sup>   |                |
| Absorption coefficient | 5.348 mm <sup>-1</sup>    |                |
| F(000)                 | 440                       |                |

**Table S2-3. Data collection and structure refinement for HCN•SbF<sub>5</sub>.**

|                                     |                                                                                                                                                                       |                           |
|-------------------------------------|-----------------------------------------------------------------------------------------------------------------------------------------------------------------------|---------------------------|
| Diffractometer                      | Bruker APEX DUO                                                                                                                                                       |                           |
| Radiation source                    | fine-focus tube, MoKα                                                                                                                                                 |                           |
| Theta range for data collection     | 3.21 to 30.43°                                                                                                                                                        |                           |
| Reflections collected               | 1543                                                                                                                                                                  |                           |
| Coverage of independent reflections | 98.5%                                                                                                                                                                 |                           |
| Absorption correction               | multi-scan                                                                                                                                                            |                           |
| Max. and min. transmission          | 0.7680 and 0.3900                                                                                                                                                     |                           |
| Structure solution technique        | direct methods                                                                                                                                                        |                           |
| Structure solution program          | SHELXTL XT 2013/1 (Bruker AXS, 2014)                                                                                                                                  |                           |
| Refinement method                   | Full-matrix least-squares on F <sup>2</sup>                                                                                                                           |                           |
| Refinement program                  | SHELXTL XL 2014/7 (Bruker AXS, 2014)                                                                                                                                  |                           |
| Function minimized                  | Σ w(F <sub>o</sub> <sup>2</sup> - F <sub>c</sub> <sup>2</sup> ) <sup>2</sup>                                                                                          |                           |
| Data / restraints / parameters      | 1543 / 0 / 76                                                                                                                                                         |                           |
| Goodness-of-fit on F <sup>2</sup>   | 1.109                                                                                                                                                                 |                           |
| Final R indices                     | 1434 data; I > 2σ(I)                                                                                                                                                  | R1 = 0.0224, wR2 = 0.0571 |
|                                     | all data                                                                                                                                                              | R1 = 0.0251, wR2 = 0.0580 |
| Weighting scheme                    | w = 1/[σ <sup>2</sup> (F <sub>o</sub> <sup>2</sup> ) + (0.0262P) <sup>2</sup> + 0.5137P]<br>where P = (F <sub>o</sub> <sup>2</sup> + 2F <sub>c</sub> <sup>2</sup> )/3 |                           |
| Largest diff. peak and hole         | 0.655 and -1.020 eÅ <sup>-3</sup>                                                                                                                                     |                           |
| R.M.S. deviation from mean          | 0.179 eÅ <sup>-3</sup>                                                                                                                                                |                           |

**Table S3-3. Atomic coordinates and equivalent isotropic atomic displacement parameters (Å<sup>2</sup>) for HCN•SbF<sub>5</sub>.**

U(eq) is defined as one third of the trace of the orthogonalized U<sub>ij</sub> tensor.

| x/a | y/b | z/c | U(eq) |
|-----|-----|-----|-------|
|-----|-----|-----|-------|



|     |            |            |             |            |
|-----|------------|------------|-------------|------------|
| C1  | 0.6421(5)  | 0.2651(3)  | 0.4458(3)   | 0.0155(5)  |
| N1  | 0.5037(4)  | 0.3030(3)  | 0.3737(3)   | 0.0152(5)  |
| F1  | 0.9729(3)  | 0.3857(2)  | 0.13287(18) | 0.0188(4)  |
| F2  | 0.0711(3)  | 0.2746(2)  | 0.38204(18) | 0.0203(4)  |
| F3  | 0.2530(3)  | 0.1326(2)  | 0.18482(19) | 0.0196(4)  |
| F4  | 0.4016(3)  | 0.4190(2)  | 0.11873(17) | 0.0181(4)  |
| F5  | 0.2286(3)  | 0.5584(2)  | 0.31426(18) | 0.0189(4)  |
| Sb1 | 0.22230(3) | 0.34653(2) | 0.24369(2)  | 0.01044(7) |

**Table S4-3. Bond lengths (Å) for HCN•SbF<sub>5</sub>.**

|        |            |        |            |
|--------|------------|--------|------------|
| C1-N1  | 1.125(4)   | C1-H1  | 0.91(4)    |
| N1-Sb1 | 2.132(3)   | F1-Sb1 | 1.8673(18) |
| F2-Sb1 | 1.8620(17) | F3-Sb1 | 1.8585(17) |
| F4-Sb1 | 1.8686(17) | F5-Sb1 | 1.8679(17) |

**Table S5-3. Bond angles (°) for HCN•SbF<sub>5</sub>.**

|           |           |           |           |
|-----------|-----------|-----------|-----------|
| N1-C1-H1  | 176.(2)   | C1-N1-Sb1 | 172.7(3)  |
| F3-Sb1-F2 | 91.32(8)  | F3-Sb1-F1 | 94.17(8)  |
| F2-Sb1-F1 | 92.96(8)  | F3-Sb1-F5 | 172.27(9) |
| F2-Sb1-F5 | 89.73(8)  | F1-Sb1-F5 | 93.42(8)  |
| F3-Sb1-F4 | 89.46(8)  | F2-Sb1-F4 | 173.48(8) |
| F1-Sb1-F4 | 93.44(8)  | F5-Sb1-F4 | 88.64(8)  |
| F3-Sb1-N1 | 86.48(9)  | F2-Sb1-N1 | 86.04(9)  |
| F1-Sb1-N1 | 178.82(8) | F5-Sb1-N1 | 85.96(9)  |
| F4-Sb1-N1 | 87.55(9)  |           |           |

**Table S6-3. Anisotropic atomic displacement parameters (Å<sup>2</sup>) for HCNSbF<sub>5</sub>.**

The anisotropic atomic displacement factor exponent takes the form:  $-2\pi^2[h^2 a^{*2} U_{11} + \dots + 2 h k a^* b^* U_{12}]$

|     | <b>U<sub>11</sub></b> | <b>U<sub>22</sub></b> | <b>U<sub>33</sub></b> | <b>U<sub>23</sub></b> | <b>U<sub>13</sub></b> | <b>U<sub>12</sub></b> |
|-----|-----------------------|-----------------------|-----------------------|-----------------------|-----------------------|-----------------------|
| C1  | 0.0154(13)            | 0.0167(12)            | 0.0144(13)            | -0.0027(10)           | 0.0010(11)            | -0.0004(10)           |
| N1  | 0.0155(12)            | 0.0133(10)            | 0.0169(11)            | -0.0009(9)            | 0.0018(9)             | -0.0002(9)            |
| F1  | 0.0167(9)             | 0.0179(8)             | 0.0201(9)             | -0.0020(7)            | -0.0066(7)            | 0.0020(7)             |
| F2  | 0.0161(9)             | 0.0279(9)             | 0.0175(8)             | 0.0040(7)             | 0.0054(7)             | -0.0038(7)            |
| F3  | 0.0215(10)            | 0.0116(7)             | 0.0251(10)            | -0.0049(7)            | -0.0007(8)            | 0.0011(6)             |
| F4  | 0.0215(9)             | 0.0186(8)             | 0.0151(8)             | 0.0005(6)             | 0.0062(7)             | -0.0035(7)            |
| F5  | 0.0204(9)             | 0.0142(8)             | 0.0214(9)             | -0.0056(6)            | -0.0017(7)            | 0.0012(6)             |
| Sb1 | 0.01064(11)           | 0.01055(11)           | 0.01001(11)           | -0.00064(5)           | 0.00037(7)            | -0.00031(5)           |

**Table S7-3. Hydrogen atomic coordinates and isotropic atomic displacement parameters (Å<sup>2</sup>) for HCN•SbF<sub>5</sub>.**

|    | <b>x/a</b> | <b>y/b</b> | <b>z/c</b> | <b>U(eq)</b> |
|----|------------|------------|------------|--------------|
| H1 | 0.752(6)   | 0.241(4)   | 0.507(3)   | 0.019        |



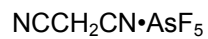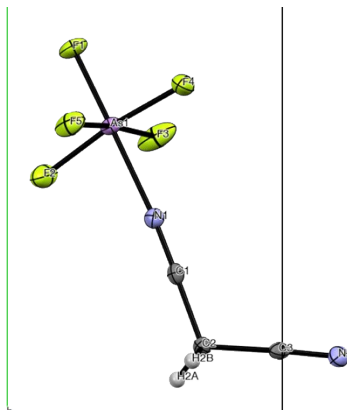

Figure S1-3. Asymmetric unit of  $\text{NCCH}_2\text{CN}\cdot\text{AsF}_5$ . View along the 001 direction.

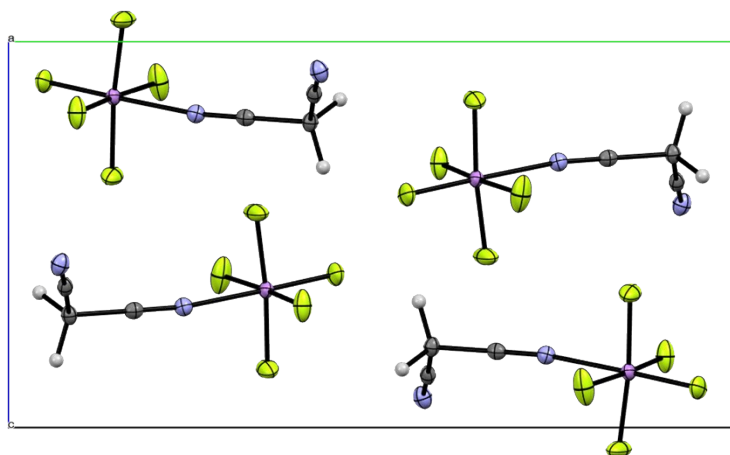

Figure S2-3. Packing of  $\text{NCCH}_2\text{CN}\cdot\text{AsF}_5$ . View along the 010 direction.

**Table S1-3. Sample and crystal data for NCCH<sub>2</sub>CN•AsF<sub>5</sub>**

|                        |                                                               |                 |
|------------------------|---------------------------------------------------------------|-----------------|
| Identification code    | AsF5_MN                                                       |                 |
| Chemical formula       | C <sub>3</sub> H <sub>2</sub> AsF <sub>5</sub> N <sub>2</sub> |                 |
| Formula weight         | 235.99 g/mol                                                  |                 |
| Temperature            | 100(2) K                                                      |                 |
| Wavelength             | 0.71073 Å                                                     |                 |
| Crystal size           | 0.181 x 0.225 x 0.268 mm                                      |                 |
| Crystal habit          | clear orange prism                                            |                 |
| Crystal system         | monoclinic                                                    |                 |
| Space group            | P 1 21/n 1                                                    |                 |
| Unit cell dimensions   | a = 5.3370(14) Å                                              | α = 90°         |
|                        | b = 15.253(4) Å                                               | β = 104.093(4)° |
|                        | c = 8.351(2) Å                                                | γ = 90°         |
| Volume                 | 659.4(3) Å <sup>3</sup>                                       |                 |
| Z                      | 4                                                             |                 |
| Density (calculated)   | 2.377 g/cm <sup>3</sup>                                       |                 |
| Absorption coefficient | 5.188 mm <sup>-1</sup>                                        |                 |
| F(000)                 | 448                                                           |                 |

**Table S2-3. Data collection and structure refinement for NCCH<sub>2</sub>CN•AsF<sub>5</sub>.**

|                                     |                                                                                                                                                                       |                           |
|-------------------------------------|-----------------------------------------------------------------------------------------------------------------------------------------------------------------------|---------------------------|
| Diffractometer                      | Bruker APEX II CCD Bruker APEX DUO                                                                                                                                    |                           |
| Radiation source                    | fine-focus tube (MoKα, λ = 0.71073 Å)                                                                                                                                 |                           |
| Theta range for data collection     | 2.67 to 30.55°                                                                                                                                                        |                           |
| Index ranges                        | -7 ≤ h ≤ 7, -21 ≤ k ≤ 21, -11 ≤ l ≤ 11                                                                                                                                |                           |
| Reflections collected               | 15118                                                                                                                                                                 |                           |
| Independent reflections             | 2020 [R(int) = 0.0273]                                                                                                                                                |                           |
| Coverage of independent reflections | 99.7%                                                                                                                                                                 |                           |
| Absorption correction               | multi-scan                                                                                                                                                            |                           |
| Max. and min. transmission          | 0.4540 and 0.3370                                                                                                                                                     |                           |
| Structure solution technique        | direct methods                                                                                                                                                        |                           |
| Structure solution program          | SHELXTL XT 2014/4 (Bruker AXS, 2014)                                                                                                                                  |                           |
| Refinement method                   | Full-matrix least-squares on F <sup>2</sup>                                                                                                                           |                           |
| Refinement program                  | SHELXTL XL 2014/7 (Bruker AXS, 2014)                                                                                                                                  |                           |
| Function minimized                  | Σ w(F <sub>o</sub> <sup>2</sup> - F <sub>c</sub> <sup>2</sup> ) <sup>2</sup>                                                                                          |                           |
| Data / restraints / parameters      | 2020 / 0 / 100                                                                                                                                                        |                           |
| Goodness-of-fit on F <sup>2</sup>   | 1.106                                                                                                                                                                 |                           |
| Δ/σ <sub>max</sub>                  | 0.003                                                                                                                                                                 |                           |
| Final R indices                     | 1813 data; I > 2σ(I)                                                                                                                                                  | R1 = 0.0183, wR2 = 0.0414 |
|                                     | all data                                                                                                                                                              | R1 = 0.0233, wR2 = 0.0427 |
| Weighting scheme                    | w = 1/[σ <sup>2</sup> (F <sub>o</sub> <sup>2</sup> ) + (0.0177P) <sup>2</sup> + 0.3993P]<br>where P = (F <sub>o</sub> <sup>2</sup> + 2F <sub>c</sub> <sup>2</sup> )/3 |                           |
| Largest diff. peak and hole         | 0.319 and -0.503 eÅ <sup>-3</sup>                                                                                                                                     |                           |
| R.M.S. deviation from mean          | 0.070 eÅ <sup>-3</sup>                                                                                                                                                |                           |

**Table S3-3. Atomic coordinates and equivalent isotropic atomic displacement parameters ( $\text{\AA}^2$ ) for  $\text{NCCH}_2\text{CN}\cdot\text{AsF}_5$ .**

$U(\text{eq})$  is defined as one third of the trace of the orthogonalized  $U_{ij}$  tensor.

|     | <b>x/a</b>  | <b>y/b</b>  | <b>z/c</b>  | <b>U(eq)</b> |
|-----|-------------|-------------|-------------|--------------|
| C1  | 0.6133(3)   | 0.82689(10) | 0.30272(17) | 0.0133(3)    |
| C2  | 0.7098(3)   | 0.91608(9)  | 0.29123(18) | 0.0139(3)    |
| C3  | 0.9894(3)   | 0.92159(9)  | 0.36438(17) | 0.0139(3)    |
| As1 | 0.37743(3)  | 0.64484(2)  | 0.35627(2)  | 0.01279(5)   |
| F1  | 0.24072(19) | 0.54919(6)  | 0.39684(12) | 0.0222(2)    |
| F2  | 0.1338(2)   | 0.70672(7)  | 0.39459(16) | 0.0342(3)    |
| F3  | 0.5449(2)   | 0.65826(7)  | 0.55680(12) | 0.0345(3)    |
| F4  | 0.63935(19) | 0.59439(6)  | 0.31564(14) | 0.0277(2)    |
| F5  | 0.2295(2)   | 0.64279(6)  | 0.15168(12) | 0.0265(2)    |
| N1  | 0.5351(2)   | 0.75852(8)  | 0.31240(15) | 0.0145(2)    |
| N2  | 0.2053(2)   | 0.92865(9)  | 0.42225(16) | 0.0183(2)    |

**Table S4-3. Bond lengths ( $\text{\AA}$ ) for  $\text{NCCH}_2\text{CN}\cdot\text{AsF}_5$ .**

|        |            |        |            |
|--------|------------|--------|------------|
| C1-N1  | 1.1334(19) | C1-C2  | 1.466(2)   |
| C2-C3  | 1.471(2)   | C2-H2A | 0.99       |
| C2-H2B | 0.99       | C3-N2  | 1.1412(19) |
| As1-F5 | 1.6989(10) | As1-F2 | 1.6990(11) |
| As1-F4 | 1.7007(10) | As1-F1 | 1.7018(10) |
| As1-F3 | 1.7078(11) | As1-N1 | 1.9999(13) |

**Table S5-3. Bond angles ( $^\circ$ ) for  $\text{NCCH}_2\text{CN}\cdot\text{AsF}_5$ .**

|            |            |           |            |
|------------|------------|-----------|------------|
| N1-C1-C2   | 178.82(15) | C1-C2-C3  | 111.28(12) |
| C1-C2-H2A  | 109.4      | C3-C2-H2A | 109.4      |
| C1-C2-H2B  | 109.4      | C3-C2-H2B | 109.4      |
| H2A-C2-H2B | 108.0      | N2-C3-C2  | 177.79(15) |
| F5-As1-F2  | 90.58(6)   | F5-As1-F4 | 89.67(6)   |
| F2-As1-F4  | 173.15(5)  | F5-As1-F1 | 93.88(5)   |
| F2-As1-F1  | 93.09(5)   | F4-As1-F1 | 93.72(5)   |
| F5-As1-F3  | 172.95(5)  | F2-As1-F3 | 89.46(7)   |
| F4-As1-F3  | 89.45(6)   | F1-As1-F3 | 93.15(5)   |
| F5-As1-N1  | 86.84(5)   | F2-As1-N1 | 85.88(5)   |
| F4-As1-N1  | 87.30(5)   | F1-As1-N1 | 178.75(5)  |
| F3-As1-N1  | 86.13(5)   | C1-N1-As1 | 171.69(12) |

**Table S6-3. Anisotropic atomic displacement parameters ( $\text{\AA}^2$ ) for  $\text{NCCH}_2\text{CN}\cdot\text{AsF}_5$ .**

The anisotropic atomic displacement factor exponent takes the form:  $-2\pi^2 [ h^2 a^2 U_{11} + \dots + 2 h k a^* b^* U_{12} ]$

|    | <b><math>U_{11}</math></b> | <b><math>U_{22}</math></b> | <b><math>U_{33}</math></b> | <b><math>U_{23}</math></b> | <b><math>U_{13}</math></b> | <b><math>U_{12}</math></b> |
|----|----------------------------|----------------------------|----------------------------|----------------------------|----------------------------|----------------------------|
| C1 | 0.0112(6)                  | 0.0165(6)                  | 0.0125(6)                  | -0.0005(5)                 | 0.0033(5)                  | 0.0016(5)                  |
| C2 | 0.0131(6)                  | 0.0122(6)                  | 0.0172(6)                  | 0.0007(5)                  | 0.0055(5)                  | -0.0005(5)                 |

|     |            |            |            |             |            |             |
|-----|------------|------------|------------|-------------|------------|-------------|
| C3  | 0.0169(6)  | 0.0105(6)  | 0.0163(6)  | -0.0005(5)  | 0.0080(5)  | 0.0003(5)   |
| As1 | 0.01498(7) | 0.01103(7) | 0.01234(7) | -0.00072(5) | 0.00331(5) | -0.00263(5) |
| F1  | 0.0285(5)  | 0.0150(4)  | 0.0240(5)  | 0.0002(4)   | 0.0082(4)  | -0.0087(4)  |
| F2  | 0.0284(5)  | 0.0197(5)  | 0.0638(8)  | -0.0079(5)  | 0.0294(5)  | -0.0034(4)  |
| F3  | 0.0549(7)  | 0.0298(6)  | 0.0131(4)  | 0.0021(4)   | -0.0028(5) | -0.0214(5)  |
| F4  | 0.0203(5)  | 0.0157(4)  | 0.0494(7)  | 0.0000(4)   | 0.0130(5)  | 0.0020(4)   |
| F5  | 0.0335(5)  | 0.0232(5)  | 0.0165(4)  | 0.0015(4)   | -0.0059(4) | -0.0092(4)  |
| N1  | 0.0137(5)  | 0.0148(6)  | 0.0149(5)  | 0.0000(4)   | 0.0035(4)  | -0.0002(4)  |
| N2  | 0.0169(6)  | 0.0166(6)  | 0.0229(6)  | -0.0028(5)  | 0.0076(5)  | -0.0003(5)  |

**Table S7-3. Hydrogen atomic coordinates and isotropic atomic displacement parameters ( $\text{\AA}^2$ ) for  $\text{NCCH}_2\text{CN}\cdot\text{AsF}_5$ .**

|     | <b>x/a</b> | <b>y/b</b> | <b>z/c</b> | <b>U(eq)</b> |
|-----|------------|------------|------------|--------------|
| H2A | 0.6183     | 0.9571     | 0.3493     | 0.017        |
| H2B | 0.6731     | 0.9339     | 0.1738     | 0.017        |

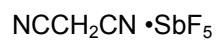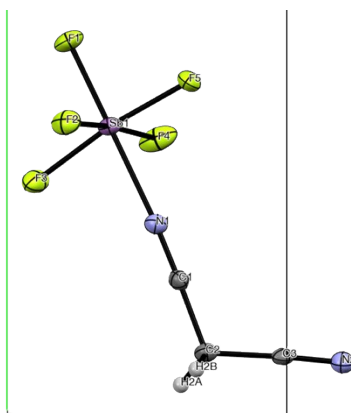

Figure S1-4. Asymmetric unit of NCCH<sub>2</sub>CN·SbF<sub>5</sub>. View along the 001 direction.

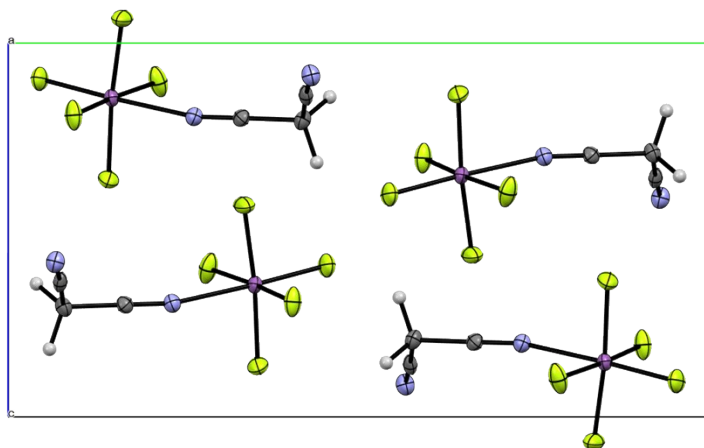

Figure S2-4. Packing of NCCH<sub>2</sub>CN·SbF<sub>5</sub>. View along the 010 direction.

**Table S1-4. Sample and crystal data for NCCH<sub>2</sub>CN•SbF<sub>5</sub>.**

|                        |                                                                |                 |
|------------------------|----------------------------------------------------------------|-----------------|
| Identification code    | AN26                                                           |                 |
| Chemical formula       | C <sub>3</sub> H <sub>2</sub> F <sub>5</sub> N <sub>2</sub> Sb |                 |
| Formula weight         | 282.82 g/mol                                                   |                 |
| Temperature            | 100(2) K                                                       |                 |
| Wavelength             | 0.71073 Å                                                      |                 |
| Crystal size           | 0.078 x 0.171 x 0.323 mm                                       |                 |
| Crystal habit          | red prism                                                      |                 |
| Crystal system         | monoclinic                                                     |                 |
| Space group            | P 1 2 <sub>1</sub> /n 1                                        |                 |
| Unit cell dimensions   | a = 5.3862(16) Å                                               | α = 90°         |
|                        | b = 15.562(5) Å                                                | β = 102.140(5)° |
|                        | c = 8.490(3) Å                                                 | γ = 90°         |
| Volume                 | 695.7(4) Å <sup>3</sup>                                        |                 |
| Z                      | 4                                                              |                 |
| Density (calculated)   | 2.700 g/cm <sup>3</sup>                                        |                 |
| Absorption coefficient | 3.997 mm <sup>-1</sup>                                         |                 |
| F(000)                 | 520                                                            |                 |

**Table S2-4. Data collection and structure refinement for NCCH<sub>2</sub>CN•SbF<sub>5</sub>.**

|                                     |                                                                                                                                                               |                           |
|-------------------------------------|---------------------------------------------------------------------------------------------------------------------------------------------------------------|---------------------------|
| Diffractometer                      | Bruker APEX DUO                                                                                                                                               |                           |
| Radiation source                    | fine-focus tube, MoKα                                                                                                                                         |                           |
| Theta range for data collection     | 2.62 to 30.50°                                                                                                                                                |                           |
| Index ranges                        | -7<=h<=7, -22<=k<=22, -12<=l<=12                                                                                                                              |                           |
| Reflections collected               | 15914                                                                                                                                                         |                           |
| Independent reflections             | 2112 [R(int) = 0.0647]                                                                                                                                        |                           |
| Coverage of independent reflections | 99.5%                                                                                                                                                         |                           |
| Absorption correction               | multi-scan                                                                                                                                                    |                           |
| Max. and min. transmission          | 0.7460 and 0.3580                                                                                                                                             |                           |
| Structure solution technique        | direct methods                                                                                                                                                |                           |
| Structure solution program          | SHELXTL XT 2014/4 (Bruker AXS, 2014)                                                                                                                          |                           |
| Refinement method                   | Full-matrix least-squares on F <sup>2</sup>                                                                                                                   |                           |
| Refinement program                  | SHELXTL XL 2014/7 (Bruker AXS, 2014)                                                                                                                          |                           |
| Function minimized                  | Σ w(F <sub>o</sub> <sup>2</sup> - F <sub>c</sub> <sup>2</sup> ) <sup>2</sup>                                                                                  |                           |
| Data / restraints / parameters      | 2112 / 0 / 100                                                                                                                                                |                           |
| Goodness-of-fit on F <sup>2</sup>   | 1.107                                                                                                                                                         |                           |
| Final R indices                     | 1691 data; I>2σ(I)                                                                                                                                            | R1 = 0.0402, wR2 = 0.0942 |
|                                     | all data                                                                                                                                                      | R1 = 0.0573, wR2 = 0.1024 |
| Weighting scheme                    | w=1/[σ <sup>2</sup> (F <sub>o</sub> <sup>2</sup> )+(0.0474P) <sup>2</sup> +3.0277P]<br>where P=(F <sub>o</sub> <sup>2</sup> +2F <sub>c</sub> <sup>2</sup> )/3 |                           |
| Largest diff. peak and hole         | 1.820 and -1.064 eÅ <sup>-3</sup>                                                                                                                             |                           |
| R.M.S. deviation from mean          | 0.241 eÅ <sup>-3</sup>                                                                                                                                        |                           |

**Table S3-4. Atomic coordinates and equivalent isotropic atomic displacement parameters (Å<sup>2</sup>) for NCCH<sub>2</sub>CN•SbF<sub>5</sub>.**

U(eq) is defined as one third of the trace of the orthogonalized U<sub>ij</sub> tensor.



|     | x/a        | y/b        | z/c        | U(eq)       |
|-----|------------|------------|------------|-------------|
| C1  | 0.6140(10) | 0.8332(3)  | 0.3000(6)  | 0.0155(9)   |
| C2  | 0.7113(10) | 0.9208(3)  | 0.2941(7)  | 0.0176(10)  |
| C3  | 0.9853(10) | 0.9255(3)  | 0.3608(6)  | 0.0162(9)   |
| F1  | 0.2211(7)  | 0.5449(2)  | 0.4048(4)  | 0.0249(7)   |
| F2  | 0.2121(7)  | 0.6432(2)  | 0.1359(4)  | 0.0254(7)   |
| F3  | 0.1022(7)  | 0.7141(2)  | 0.3974(5)  | 0.0299(8)   |
| F4  | 0.5400(8)  | 0.6629(2)  | 0.5667(4)  | 0.0327(9)   |
| F5  | 0.6510(6)  | 0.5932(2)  | 0.3075(5)  | 0.0272(7)   |
| N1  | 0.5327(8)  | 0.7657(3)  | 0.3035(5)  | 0.0169(8)   |
| N2  | 0.1986(9)  | 0.9325(3)  | 0.4141(6)  | 0.0203(9)   |
| Sb1 | 0.36676(6) | 0.64759(2) | 0.35362(4) | 0.01500(11) |

Table S4-4. Bond lengths (Å) for NCCH<sub>2</sub>CN•SbF<sub>5</sub>.

|        |          |        |          |
|--------|----------|--------|----------|
| C1-N1  | 1.141(7) | C1-C2  | 1.465(7) |
| C2-C3  | 1.467(8) | C2-H2A | 0.99     |
| C2-H2B | 0.99     | C3-N2  | 1.148(7) |
| F1-Sb1 | 1.871(3) | F2-Sb1 | 1.862(3) |
| F3-Sb1 | 1.860(3) | F4-Sb1 | 1.868(3) |
| F5-Sb1 | 1.862(3) | N1-Sb1 | 2.126(4) |

Table S5-4. Bond angles (°) for NCCH<sub>2</sub>CN•SbF<sub>5</sub>.

|            |            |           |            |
|------------|------------|-----------|------------|
| N1-C1-C2   | 178.4(5)   | C1-C2-C3  | 111.7(4)   |
| C1-C2-H2A  | 109.3      | C3-C2-H2A | 109.3      |
| C1-C2-H2B  | 109.3      | C3-C2-H2B | 109.3      |
| H2A-C2-H2B | 107.9      | N2-C3-C2  | 177.3(5)   |
| C1-N1-Sb1  | 168.9(4)   | F3-Sb1-F2 | 90.97(17)  |
| F3-Sb1-F5  | 173.28(15) | F2-Sb1-F5 | 89.46(17)  |
| F3-Sb1-F4  | 89.03(19)  | F2-Sb1-F4 | 173.69(15) |
| F5-Sb1-F4  | 89.80(18)  | F3-Sb1-F1 | 92.99(15)  |
| F2-Sb1-F1  | 94.44(15)  | F5-Sb1-F1 | 93.66(15)  |
| F4-Sb1-F1  | 91.86(15)  | F3-Sb1-N1 | 86.05(16)  |
| F2-Sb1-N1  | 87.26(16)  | F5-Sb1-N1 | 87.28(16)  |
| F4-Sb1-N1  | 86.44(16)  | F1-Sb1-N1 | 178.06(16) |

Table S6-4. Anisotropic atomic displacement parameters (Å<sup>2</sup>) for NCCH<sub>2</sub>CN•SbF<sub>5</sub>.

The anisotropic atomic displacement factor exponent takes the form:  $-2\pi^2 [ h^2 a^2 U_{11} + \dots + 2 h k a^* b^* U_{12} ]$

|    | U <sub>11</sub> | U <sub>22</sub> | U <sub>33</sub> | U <sub>23</sub> | U <sub>13</sub> | U <sub>12</sub> |
|----|-----------------|-----------------|-----------------|-----------------|-----------------|-----------------|
| C1 | 0.015(2)        | 0.015(2)        | 0.016(2)        | 0.0008(17)      | 0.0018(18)      | 0.0021(17)      |
| C2 | 0.019(2)        | 0.014(2)        | 0.020(2)        | 0.0026(18)      | 0.0044(19)      | -0.0011(18)     |
| C3 | 0.020(2)        | 0.010(2)        | 0.021(2)        | -0.0021(17)     | 0.0102(19)      | 0.0001(18)      |
| F1 | 0.0302(18)      | 0.0163(15)      | 0.0285(17)      | -0.0001(13)     | 0.0069(14)      | -0.0091(13)     |
| F2 | 0.0321(18)      | 0.0217(16)      | 0.0179(15)      | -0.0021(12)     | -0.0047(13)     | -0.0029(14)     |
| F3 | 0.0275(18)      | 0.0197(16)      | 0.048(2)        | -0.0088(15)     | 0.0206(17)      | -0.0024(14)     |
| F4 | 0.054(3)        | 0.0246(18)      | 0.0145(15)      | 0.0009(13)      | -0.0037(16)     | -0.0137(16)     |

|     |             |             |             |              |             |              |
|-----|-------------|-------------|-------------|--------------|-------------|--------------|
| F5  | 0.0202(16)  | 0.0156(15)  | 0.047(2)    | -0.0021(14)  | 0.0101(15)  | 0.0038(13)   |
| N1  | 0.019(2)    | 0.0149(19)  | 0.0172(19)  | 0.0011(15)   | 0.0038(16)  | 0.0008(16)   |
| N2  | 0.020(2)    | 0.017(2)    | 0.023(2)    | -0.0016(17)  | 0.0047(18)  | 0.0000(17)   |
| Sb1 | 0.01866(17) | 0.01123(16) | 0.01497(17) | -0.00078(12) | 0.00319(11) | -0.00226(13) |

**Table S7-4. Hydrogen atomic coordinates and isotropic atomic displacement parameters ( $\text{\AA}^2$ ) for AN26.**

|     | <b>x/a</b> | <b>y/b</b> | <b>z/c</b> | <b>U(eq)</b> |
|-----|------------|------------|------------|--------------|
| H2A | 0.6213     | 0.9596     | 0.3558     | 0.021        |
| H2B | 0.6763     | 0.9409     | 0.1809     | 0.021        |

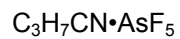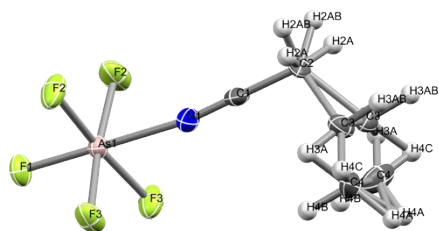

Figure S1-5. Molecular unit of  $\text{C}_3\text{H}_7\text{CN}\cdot\text{AsF}_5$ .

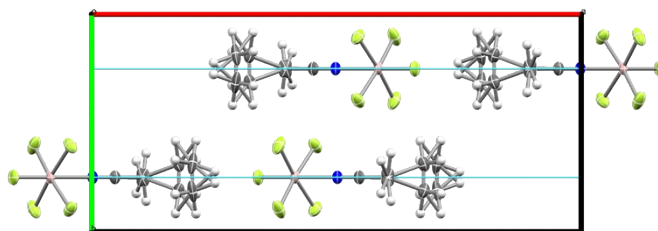

Figure S2-5. Packing of  $\text{C}_3\text{H}_7\text{CN}\cdot\text{AsF}_5$  in the unit cell. View along the 001 direction (mirror plane in cyan).

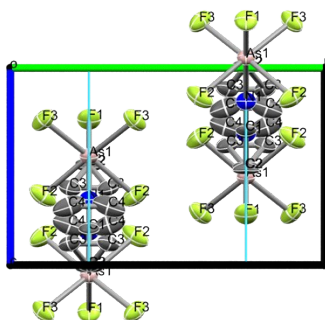

Figure S3-5. Packing of  $\text{C}_3\text{H}_7\text{CN}\cdot\text{AsF}_5$  in the unit cell. View along the 010 direction (mirror plane in cyan)..

**Table S1-5. Sample and crystal data for C<sub>3</sub>H<sub>7</sub>CN•AsF<sub>5</sub>.**

|                        |                                                  |         |
|------------------------|--------------------------------------------------|---------|
| Identification code    | TS410                                            |         |
| Chemical formula       | C <sub>4</sub> H <sub>7</sub> AsF <sub>5</sub> N |         |
| Formula weight         | 239.03 g/mol                                     |         |
| Temperature            | 100(2) K                                         |         |
| Wavelength             | 0.71073 Å                                        |         |
| Crystal size           | 0.080 x 0.090 x 0.120 mm                         |         |
| Crystal habit          | clear colorless prism                            |         |
| Crystal system         | orthorhombic                                     |         |
| Space group            | P n m a                                          |         |
| Unit cell dimensions   | a = 18.521(4) Å                                  | α = 90° |
|                        | b = 8.217(2) Å                                   | β = 90° |
|                        | c = 5.1493(13) Å                                 | γ = 90° |
| Volume                 | 783.7(3) Å <sup>3</sup>                          |         |
| Z                      | 4                                                |         |
| Density (calculated)   | 2.026 g/cm <sup>3</sup>                          |         |
| Absorption coefficient | 4.363 mm <sup>-1</sup>                           |         |
| F(000)                 | 464                                              |         |

**Table S2-5. Data collection and structure refinement for C<sub>3</sub>H<sub>7</sub>CN•AsF<sub>5</sub>.**

|                                     |                                                                                                                                                                       |                           |
|-------------------------------------|-----------------------------------------------------------------------------------------------------------------------------------------------------------------------|---------------------------|
| Diffractometer                      | Bruker APEX II CCD Bruker APEX DUO                                                                                                                                    |                           |
| Radiation source                    | fine-focus tube (MoKα, λ = 0.71073 Å)                                                                                                                                 |                           |
| Theta range for data collection     | 2.20 to 27.48°                                                                                                                                                        |                           |
| Index ranges                        | -24 ≤ h ≤ 23, -10 ≤ k ≤ 10, -6 ≤ l ≤ 6                                                                                                                                |                           |
| Reflections collected               | 11247                                                                                                                                                                 |                           |
| Independent reflections             | 964 [R(int) = 0.1164]                                                                                                                                                 |                           |
| Coverage of independent reflections | 99.9%                                                                                                                                                                 |                           |
| Absorption correction               | Multi-Scan                                                                                                                                                            |                           |
| Max. and min. transmission          | 0.7220 and 0.6230                                                                                                                                                     |                           |
| Structure solution technique        | direct methods                                                                                                                                                        |                           |
| Structure solution program          | SHELXT 2014/4 (Sheldrick, 2014)                                                                                                                                       |                           |
| Refinement method                   | Full-matrix least-squares on F <sup>2</sup>                                                                                                                           |                           |
| Refinement program                  | SHELXL-2017/1 (Sheldrick, 2017)                                                                                                                                       |                           |
| Function minimized                  | Σ w(F <sub>o</sub> <sup>2</sup> - F <sub>c</sub> <sup>2</sup> ) <sup>2</sup>                                                                                          |                           |
| Data / restraints / parameters      | 964 / 54 / 71                                                                                                                                                         |                           |
| Goodness-of-fit on F <sup>2</sup>   | 1.140                                                                                                                                                                 |                           |
| Final R indices                     | 729 data; I > 2σ(I)                                                                                                                                                   | R1 = 0.0506, wR2 = 0.0704 |
|                                     | all data                                                                                                                                                              | R1 = 0.0795, wR2 = 0.0764 |
| Weighting scheme                    | w = 1/[σ <sup>2</sup> (F <sub>o</sub> <sup>2</sup> ) + (0.0261P) <sup>2</sup> + 0.8497P]<br>where P = (F <sub>o</sub> <sup>2</sup> + 2F <sub>c</sub> <sup>2</sup> )/3 |                           |
| Largest diff. peak and hole         | 1.018 and -0.710 eÅ <sup>-3</sup>                                                                                                                                     |                           |
| R.M.S. deviation from mean          | 0.127 eÅ <sup>-3</sup>                                                                                                                                                |                           |

**Table S3-5. Atomic coordinates and equivalent isotropic atomic displacement parameters (Å<sup>2</sup>) for C<sub>3</sub>H<sub>7</sub>CN•AsF<sub>5</sub>.**

U(eq) is defined as one third of the trace of the orthogonalized U<sub>ij</sub> tensor.

|     | x/a         | y/b        | z/c         | U(eq)       |
|-----|-------------|------------|-------------|-------------|
| C1  | 0.0469(3)   | 0.75       | 0.3174(11)  | 0.0216(13)  |
| C2  | 0.1046(4)   | 0.751(6)   | 0.5083(10)  | 0.0291(17)  |
| C3  | 0.1779(4)   | 0.8107(9)  | 0.3920(15)  | 0.026(2)    |
| C4  | 0.2054(4)   | 0.6861(11) | 0.2023(18)  | 0.042(3)    |
| As1 | 0.91496(3)  | 0.75       | 0.94754(11) | 0.01817(19) |
| F1  | 0.83995(18) | 0.75       | 0.7598(7)   | 0.0296(8)   |
| F2  | 0.88210(12) | 0.6030(3)  | 0.1469(5)   | 0.0379(7)   |
| F3  | 0.95645(12) | 0.6043(3)  | 0.7639(5)   | 0.0323(6)   |
| N1  | 0.0019(3)   | 0.75       | 0.1681(9)   | 0.0223(11)  |

**Table S4-5. Bond lengths (Å) for C<sub>3</sub>H<sub>7</sub>CN•AsF<sub>5</sub>.**

|         |           |         |           |
|---------|-----------|---------|-----------|
| C1-N1   | 1.134(7)  | C1-C2   | 1.451(8)  |
| C2-C3   | 1.562(15) | C2-H2A  | 0.99      |
| C2-H2AB | 0.99      | C3-C4   | 1.504(10) |
| C3-H3A  | 0.99      | C3-H3AB | 0.99      |
| C4-H4A  | 0.98      | C4-H4B  | 0.98      |
| C4-H4C  | 0.98      | As1-F1  | 1.693(3)  |
| As1-F2  | 1.698(2)  | As1-F2  | 1.698(2)  |
| As1-F3  | 1.708(2)  | As1-F3  | 1.708(2)  |
| As1-N1  | 1.971(5)  |         |           |

**Table S5-5. Bond angles (°) for C<sub>3</sub>H<sub>7</sub>CN•AsF<sub>5</sub>.**

|             |            |            |            |
|-------------|------------|------------|------------|
| N1-C1-C2    | 180.(2)    | C1-C2-C3   | 112.5(9)   |
| C1-C2-H2A   | 109.1      | C3-C2-H2A  | 109.1      |
| C1-C2-H2AB  | 109.1      | C3-C2-H2AB | 109.1      |
| H2A-C2-H2AB | 107.8      | C4-C3-C2   | 109.4(17)  |
| C4-C3-H3A   | 109.8      | C2-C3-H3A  | 109.8      |
| C4-C3-H3AB  | 109.8      | C2-C3-H3AB | 109.8      |
| H3A-C3-H3AB | 108.2      | C3-C4-H4A  | 109.5      |
| C3-C4-H4B   | 109.5      | H4A-C4-H4B | 109.5      |
| C3-C4-H4C   | 109.5      | H4A-C4-H4C | 109.5      |
| H4B-C4-H4C  | 109.5      | F1-As1-F2  | 92.94(12)  |
| F1-As1-F2   | 92.94(12)  | F2-As1-F2  | 90.68(19)  |
| F1-As1-F3   | 93.04(12)  | F2-As1-F3  | 89.84(13)  |
| F2-As1-F3   | 173.96(12) | F1-As1-F3  | 93.04(12)  |
| F2-As1-F3   | 173.96(12) | F2-As1-F3  | 89.84(13)  |
| F3-As1-F3   | 89.02(17)  | F1-As1-N1  | 179.64(19) |
| F2-As1-N1   | 86.81(12)  | F2-As1-N1  | 86.81(12)  |
| F3-As1-N1   | 87.21(12)  | F3-As1-N1  | 87.21(12)  |
| C1-N1-As1   | 172.5(5)   |            |            |

**Table S6-5. Torsion angles (°) for C<sub>3</sub>H<sub>7</sub>CN•AsF<sub>5</sub>.**

|             |         |
|-------------|---------|
| C1-C2-C3-C4 | -11.(4) |
|-------------|---------|

**Table S7-5. Anisotropic atomic displacement parameters ( $\text{\AA}^2$ ) for  $\text{C}_3\text{H}_7\text{CN}\cdot\text{AsF}_5$ .**

The anisotropic atomic displacement factor exponent takes the form:  $-2\pi^2[h^2 a'^2 U_{11} + \dots + 2 h k a' b' U_{12}]$

|     | $U_{11}$   | $U_{22}$   | $U_{33}$   | $U_{23}$    | $U_{13}$    | $U_{12}$    |
|-----|------------|------------|------------|-------------|-------------|-------------|
| C1  | 0.020(3)   | 0.030(3)   | 0.015(3)   | 0           | 0.005(2)    | 0           |
| C2  | 0.026(4)   | 0.052(5)   | 0.010(3)   | 0.005(15)   | -0.005(2)   | -0.013(11)  |
| C3  | 0.023(4)   | 0.036(5)   | 0.019(5)   | 0.005(3)    | -0.003(3)   | -0.004(3)   |
| C4  | 0.015(5)   | 0.077(8)   | 0.033(5)   | -0.018(4)   | 0.002(4)    | -0.011(4)   |
| As1 | 0.0132(3)  | 0.0241(3)  | 0.0172(3)  | 0           | -0.0019(3)  | 0           |
| F1  | 0.0180(17) | 0.0391(19) | 0.0316(19) | 0           | -0.0113(14) | 0           |
| F2  | 0.0265(14) | 0.0510(16) | 0.0362(14) | 0.0199(13)  | -0.0055(12) | -0.0140(13) |
| F3  | 0.0276(14) | 0.0357(14) | 0.0335(14) | -0.0139(12) | -0.0070(11) | 0.0101(11)  |
| N1  | 0.017(3)   | 0.028(3)   | 0.022(3)   | 0           | 0.000(2)    | 0           |

**Table S8-5. Hydrogen atomic coordinates and isotropic atomic displacement parameters ( $\text{\AA}^2$ ) for  $\text{C}_3\text{H}_7\text{CN}\cdot\text{AsF}_5$ .**

|      | $x/a$  | $y/b$  | $z/c$  | $U(\text{eq})$ |
|------|--------|--------|--------|----------------|
| H2A  | 0.1108 | 0.6403 | 0.5791 | 0.035          |
| H2AB | 0.0907 | 0.8239 | 0.6537 | 0.035          |
| H3A  | 0.1710 | 0.9163 | 0.3028 | 0.031          |
| H3AB | 0.2135 | 0.8263 | 0.5331 | 0.031          |
| H4A  | 0.2514 | 0.7232 | 0.1288 | 0.063          |
| H4B  | 0.1701 | 0.6717 | 0.0625 | 0.063          |
| H4C  | 0.2127 | 0.5822 | 0.2921 | 0.063          |

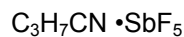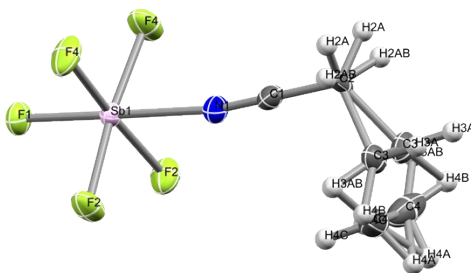

Figure S1-5. Molecular unit of  $\text{C}_3\text{H}_7\text{CN}\cdot\text{SbF}_5$ .

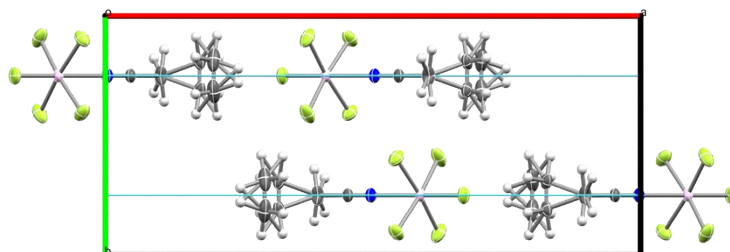

Figure S2-5. Packing of  $\text{C}_3\text{H}_7\text{CN}\cdot\text{SbF}_5$  in the unit cell. View along the 001 direction (mirror plane in cyan).

Table S1-6. Sample and crystal data for  $\text{C}_3\text{H}_7\text{CN}\cdot\text{SbF}_5$ .

|                        |                                            |                     |
|------------------------|--------------------------------------------|---------------------|
| Identification code    | AN30                                       |                     |
| Chemical formula       | $\text{C}_4\text{H}_7\text{F}_5\text{NSb}$ |                     |
| Formula weight         | 285.86 g/mol                               |                     |
| Temperature            | 100(2) K                                   |                     |
| Wavelength             | 0.71073 Å                                  |                     |
| Crystal size           | 0.079 x 0.093 x 0.149 mm                   |                     |
| Crystal system         | orthorhombic                               |                     |
| Space group            | P n m a                                    |                     |
| Unit cell dimensions   | $a = 18.894(7)$ Å                          | $\alpha = 90^\circ$ |
|                        | $b = 8.416(3)$ Å                           | $\beta = 90^\circ$  |
|                        | $c = 5.261(2)$ Å                           | $\gamma = 90^\circ$ |
| Volume                 | $836.6(5)$ Å <sup>3</sup>                  |                     |
| Z                      | 4                                          |                     |
| Density (calculated)   | 2.270 g/cm <sup>3</sup>                    |                     |
| Absorption coefficient | 3.322 mm <sup>-1</sup>                     |                     |
| F(000)                 | 536                                        |                     |

**Table S2-6. Data collection and structure refinement for C<sub>3</sub>H<sub>7</sub>CN•SbF<sub>5</sub>.**

|                                   |                                                                                                                         |                           |
|-----------------------------------|-------------------------------------------------------------------------------------------------------------------------|---------------------------|
| Diffractometer                    | Bruker APEX DUO                                                                                                         |                           |
| Radiation source                  | fine-focus tube (MoK $\alpha$ , $\lambda$ = 0.71073 Å)                                                                  |                           |
| Theta range for data collection   | 2.16 to 28.27°                                                                                                          |                           |
| Index ranges                      | -25<=h<=25, -11<=k<=11, -7<=l<=7                                                                                        |                           |
| Reflections collected             | 17084                                                                                                                   |                           |
| Independent reflections           | 1101 [R(int) = 0.0521]                                                                                                  |                           |
| Absorption correction             | multi-scan                                                                                                              |                           |
| Max. and min. transmission        | 0.7790 and 0.6370                                                                                                       |                           |
| Structure solution technique      | direct methods                                                                                                          |                           |
| Structure solution program        | SHELXTL XT 2014/5 (Bruker AXS, 2014)                                                                                    |                           |
| Refinement method                 | Full-matrix least-squares on F <sup>2</sup>                                                                             |                           |
| Refinement program                | SHELXTL XL 2017/1 (Bruker AXS, 2017)                                                                                    |                           |
| Function minimized                | $\Sigma w(F_o^2 - F_c^2)^2$                                                                                             |                           |
| Data / restraints / parameters    | 1101 / 54 / 71                                                                                                          |                           |
| Goodness-of-fit on F <sup>2</sup> | 1.068                                                                                                                   |                           |
| Final R indices                   | 949 data;  >2 $\sigma$ (I)                                                                                              | R1 = 0.0167, wR2 = 0.0335 |
|                                   | all data                                                                                                                | R1 = 0.0239, wR2 = 0.0348 |
| Weighting scheme                  | w=1/[ $\sigma^2(F_o^2)+(0.0173P)^2+0.1271P$ ]<br>where P=(F <sub>o</sub> <sup>2</sup> +2F <sub>c</sub> <sup>2</sup> )/3 |                           |
| Largest diff. peak and hole       | 0.419 and -0.594 eÅ <sup>-3</sup>                                                                                       |                           |
| R.M.S. deviation from mean        | 0.081 eÅ <sup>-3</sup>                                                                                                  |                           |

**Table S3-6. Atomic coordinates and equivalent isotropic atomic displacement parameters (Å<sup>2</sup>) for C<sub>3</sub>H<sub>7</sub>CN•SbF<sub>5</sub>.**

U(eq) is defined as one third of the trace of the orthogonalized U<sub>ij</sub> tensor.

|     | x/a         | y/b         | z/c        | U(eq)      |
|-----|-------------|-------------|------------|------------|
| Sb1 | 0.91202(2)  | 0.25        | 0.94928(4) | 0.01793(6) |
| F1  | 0.83083(8)  | 0.25        | 0.7493(3)  | 0.0305(4)  |
| F2  | 0.95661(6)  | 0.40484(15) | 0.7506(2)  | 0.0330(3)  |
| F4  | 0.87736(7)  | 0.09143(16) | 0.1631(3)  | 0.0396(3)  |
| N1  | 0.00349(12) | 0.25        | 0.1796(5)  | 0.0235(5)  |
| C1  | 0.04750(14) | 0.25        | 0.3268(6)  | 0.0225(6)  |
| C2  | 0.10385(16) | 0.249(2)    | 0.5170(7)  | 0.0322(11) |
| C3  | 0.1759(2)   | 0.1918(5)   | 0.4006(8)  | 0.0261(9)  |
| C4  | 0.2025(2)   | 0.3149(6)   | 0.2129(9)  | 0.0457(14) |

**Table S4-6. Bond lengths (Å) for C<sub>3</sub>H<sub>7</sub>CN•SbF<sub>5</sub>.**

|         |            |         |            |
|---------|------------|---------|------------|
| Sb1-F1  | 1.8602(16) | Sb1-F4  | 1.8642(13) |
| Sb1-F4  | 1.8643(13) | Sb1-F2  | 1.8711(12) |
| Sb1-F2  | 1.8711(12) | Sb1-N1  | 2.111(2)   |
| N1-C1   | 1.136(4)   | C1-C2   | 1.461(4)   |
| C2-C3   | 1.569(6)   | C2-H2A  | 0.99       |
| C2-H2AB | 0.99       | C3-C4   | 1.517(6)   |
| C3-H3A  | 0.99       | C3-H3AB | 0.99       |



|        |      |        |      |
|--------|------|--------|------|
| C4-H4A | 0.98 | C4-H4B | 0.98 |
| C4-H4C | 0.98 |        |      |

**Table S5-6. Bond angles (°) for C<sub>3</sub>H<sub>7</sub>CN•SbF<sub>5</sub>.**

|             |           |            |           |
|-------------|-----------|------------|-----------|
| F1-Sb1-F4   | 92.96(6)  | F1-Sb1-F4  | 92.96(6)  |
| F4-Sb1-F4   | 91.43(10) | F1-Sb1-F2  | 93.17(6)  |
| F4-Sb1-F2   | 89.82(7)  | F4-Sb1-F2  | 173.67(5) |
| F1-Sb1-F2   | 93.17(6)  | F4-Sb1-F2  | 173.67(5) |
| F4-Sb1-F2   | 89.82(7)  | F2-Sb1-F2  | 88.28(9)  |
| F1-Sb1-N1   | 179.41(8) | F4-Sb1-N1  | 86.63(6)  |
| F4-Sb1-N1   | 86.63(6)  | F2-Sb1-N1  | 87.26(6)  |
| F2-Sb1-N1   | 87.26(6)  | C1-N1-Sb1  | 172.1(2)  |
| N1-C1-C2    | 179.7(6)  | C1-C2-C3   | 111.5(3)  |
| C1-C2-H2A   | 109.3     | C3-C2-H2A  | 109.3     |
| C1-C2-H2AB  | 109.3     | C3-C2-H2AB | 109.3     |
| H2A-C2-H2AB | 108.0     | C4-C3-C2   | 109.3(6)  |
| C4-C3-H3A   | 109.8     | C2-C3-H3A  | 109.8     |
| C4-C3-H3AB  | 109.8     | C2-C3-H3AB | 109.8     |
| H3A-C3-H3AB | 108.3     | C3-C4-H4A  | 109.5     |
| C3-C4-H4B   | 109.5     | H4A-C4-H4B | 109.5     |
| C3-C4-H4C   | 109.5     | H4A-C4-H4C | 109.5     |
| H4B-C4-H4C  | 109.5     |            |           |

**Table S6-6. Torsion angles (°) for C<sub>3</sub>H<sub>7</sub>CN•SbF<sub>5</sub>.**

|             |          |
|-------------|----------|
| C1-C2-C3-C4 | 68.1(11) |
|-------------|----------|

**Table S7-6. Anisotropic atomic displacement parameters (Å<sup>2</sup>) for C<sub>3</sub>H<sub>7</sub>CN•SbF<sub>5</sub>.**

The anisotropic atomic displacement factor exponent takes the form:  $-2\pi^2 [ h^2 a^2 U_{11} + \dots + 2 h k a^* b^* U_{12} ]$

|     | <b>U<sub>11</sub></b> | <b>U<sub>22</sub></b> | <b>U<sub>33</sub></b> | <b>U<sub>23</sub></b> | <b>U<sub>13</sub></b> | <b>U<sub>12</sub></b> |
|-----|-----------------------|-----------------------|-----------------------|-----------------------|-----------------------|-----------------------|
| Sb1 | 0.01406(9)            | 0.02218(10)           | 0.01754(10)           | 0                     | -0.00110(8)           | 0                     |
| F1  | 0.0197(8)             | 0.0421(10)            | 0.0297(10)            | 0                     | -0.0091(7)            | 0                     |
| F2  | 0.0329(7)             | 0.0348(7)             | 0.0314(7)             | 0.0128(6)             | -0.0044(6)            | -0.0110(5)            |
| F4  | 0.0314(7)             | 0.0497(8)             | 0.0378(8)             | 0.0205(7)             | -0.0058(6)            | -0.0158(6)            |
| N1  | 0.0182(12)            | 0.0291(13)            | 0.0232(14)            | 0                     | -0.0027(10)           | 0                     |
| C1  | 0.0171(14)            | 0.0266(14)            | 0.0239(16)            | 0                     | 0.0032(12)            | 0                     |
| C2  | 0.0218(15)            | 0.055(3)              | 0.0201(19)            | -0.021(7)             | -0.0041(13)           | 0.003(7)              |
| C3  | 0.0183(18)            | 0.034(2)              | 0.026(2)              | -0.0059(15)           | -0.0058(16)           | 0.0032(15)            |
| C4  | 0.024(2)              | 0.079(4)              | 0.034(3)              | 0.019(2)              | 0.002(2)              | 0.004(2)              |

**Table S8-6. Hydrogen atomic coordinates and isotropic atomic displacement parameters (Å<sup>2</sup>) for C<sub>3</sub>H<sub>7</sub>CN•SbF<sub>5</sub>.**

|      | <b>x/a</b> | <b>y/b</b> | <b>z/c</b> | <b>U(eq)</b> |
|------|------------|------------|------------|--------------|
| H2A  | 0.0904     | 0.1782     | 0.6588     | 0.039        |
| H2AB | 0.1097     | 0.3579     | 0.5864     | 0.039        |

|      |        |        |        |       |
|------|--------|--------|--------|-------|
| H3A  | 0.2112 | 0.1767 | 0.5377 | 0.031 |
| H3AB | 0.1691 | 0.0888 | 0.3132 | 0.031 |
| H4A  | 0.2480 | 0.2801 | 0.1422 | 0.069 |
| H4B  | 0.2088 | 0.4168 | 0.3000 | 0.069 |
| H4C  | 0.1681 | 0.3272 | 0.0751 | 0.069 |

cyclo-C<sub>3</sub>H<sub>5</sub>CN•AsF<sub>5</sub>

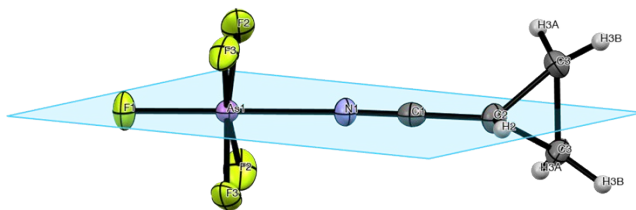

Figure S1-7. Molecular unit of cyclo-C<sub>3</sub>H<sub>5</sub>CN•AsF<sub>5</sub> (mirror plane in cyan).

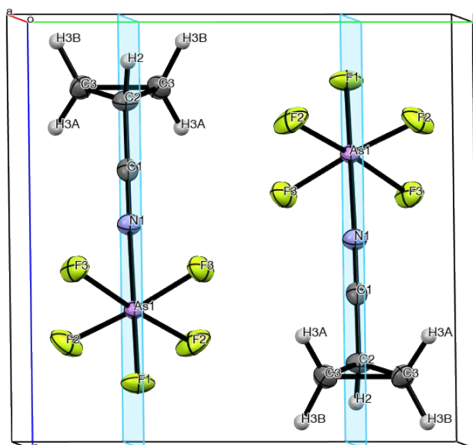

Figure S2-7. Packing of cyclo-C<sub>3</sub>H<sub>5</sub>CN•AsF<sub>5</sub> in the unit cell. View along the 010 direction (mirror plane in cyan).

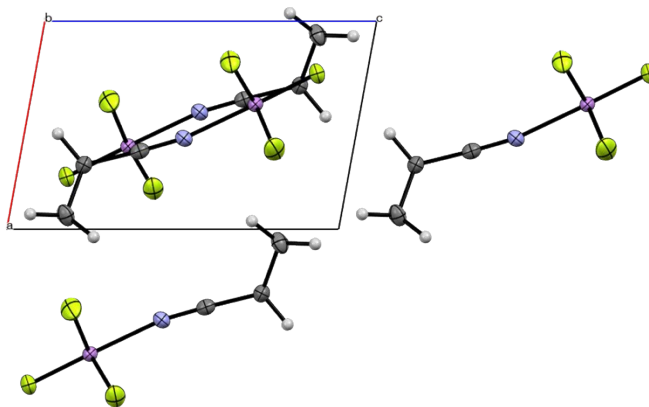

Figure S3-7. Packing of cyclo-C<sub>3</sub>H<sub>5</sub>CN•AsF<sub>5</sub> in the unit cell. View along the 100 direction.

**Table S1-7. Sample and crystal data for cyclo-C<sub>3</sub>H<sub>5</sub>CN•AsF<sub>5</sub>.**

|                        |                                                                               |                  |
|------------------------|-------------------------------------------------------------------------------|------------------|
| Identification code    | TS383                                                                         |                  |
| Chemical formula       | C <sub>8</sub> H <sub>10</sub> As <sub>2</sub> F <sub>10</sub> N <sub>2</sub> |                  |
| Formula weight         | 474.02 g/mol                                                                  |                  |
| Temperature            | 100(2) K                                                                      |                  |
| Wavelength             | 0.71073 Å                                                                     |                  |
| Crystal size           | 0.225 x 0.328 x 0.402 mm                                                      |                  |
| Crystal habit          | clear colorless prism                                                         |                  |
| Crystal system         | monoclinic                                                                    |                  |
| Space group            | P 1 21/m 1                                                                    |                  |
| Unit cell dimensions   | a = 5.227(5) Å                                                                | α = 90°          |
|                        | b = 8.481(7) Å                                                                | β = 100.370(12)° |
|                        | c = 8.215(7) Å                                                                | γ = 90°          |
| Volume                 | 358.2(5) Å <sup>3</sup>                                                       |                  |
| Z                      | 1                                                                             |                  |
| Density (calculated)   | 2.197 g/cm <sup>3</sup>                                                       |                  |
| Absorption coefficient | 4.772 mm <sup>-1</sup>                                                        |                  |
| F(000)                 | 228                                                                           |                  |

**Table S2-7. Data collection and structure refinement for cyclo-C<sub>3</sub>H<sub>5</sub>CN•AsF<sub>5</sub>.**

|                                     |                                                                                                                                                             |                           |
|-------------------------------------|-------------------------------------------------------------------------------------------------------------------------------------------------------------|---------------------------|
| Diffractometer                      | Bruker APEX DUO                                                                                                                                             |                           |
| Radiation source                    | fine-focus tube, MoKα                                                                                                                                       |                           |
| Theta range for data collection     | 2.52 to 30.65°                                                                                                                                              |                           |
| Index ranges                        | -7<=h<=7, -12<=k<=12, -11<=l<=11                                                                                                                            |                           |
| Reflections collected               | 8928                                                                                                                                                        |                           |
| Independent reflections             | 1148 [R(int) = 0.0577]                                                                                                                                      |                           |
| Coverage of independent reflections | 97.0%                                                                                                                                                       |                           |
| Absorption correction               | multi-scan                                                                                                                                                  |                           |
| Structure solution technique        | direct methods                                                                                                                                              |                           |
| Structure solution program          | SHELXTL XT 2014/4 (Bruker AXS, 2014)                                                                                                                        |                           |
| Refinement method                   | Full-matrix least-squares on F <sup>2</sup>                                                                                                                 |                           |
| Refinement program                  | SHELXTL XL 2014/7 (Bruker AXS, 2014)                                                                                                                        |                           |
| Function minimized                  | Σ w(F <sub>o</sub> <sup>2</sup> - F <sub>c</sub> <sup>2</sup> ) <sup>2</sup>                                                                                |                           |
| Data / restraints / parameters      | 1148 / 0 / 58                                                                                                                                               |                           |
| Goodness-of-fit on F <sup>2</sup>   | 1.096                                                                                                                                                       |                           |
| Δ/σ <sub>max</sub>                  | 0.001                                                                                                                                                       |                           |
| Final R indices                     | 1025 data; I>2σ(I)                                                                                                                                          | R1 = 0.0249, wR2 = 0.0478 |
|                                     | all data                                                                                                                                                    | R1 = 0.0315, wR2 = 0.0490 |
| Weighting scheme                    | w=1/[σ <sup>2</sup> (F <sub>o</sub> <sup>2</sup> )+(0.0136P) <sup>2</sup> +0.1813P], where P=(F <sub>o</sub> <sup>2</sup> +2F <sub>c</sub> <sup>2</sup> )/3 |                           |
| Largest diff. peak and hole         | 0.456 and -0.753 eÅ <sup>-3</sup>                                                                                                                           |                           |
| R.M.S. deviation from mean          | 0.103 eÅ <sup>-3</sup>                                                                                                                                      |                           |

**Table S3-7. Atomic coordinates and equivalent isotropic atomic displacement parameters (Å<sup>2</sup>) for cyclo-C<sub>3</sub>H<sub>5</sub>CN•AsF<sub>5</sub>.**

U(eq) is defined as one third of the trace of the orthogonalized U<sub>ij</sub> tensor.

| x/a | y/b | z/c | U(eq) |
|-----|-----|-----|-------|
|-----|-----|-----|-------|

|     |            |             |             |            |
|-----|------------|-------------|-------------|------------|
| C1  | 0.3754(4)  | 0.75        | 0.6427(3)   | 0.0183(5)  |
| C2  | 0.3094(5)  | 0.75        | 0.8032(3)   | 0.0202(5)  |
| C3  | 0.0663(4)  | 0.6629(2)   | 0.8303(3)   | 0.0236(4)  |
| As1 | 0.60080(5) | 0.75        | 0.31950(3)  | 0.01407(8) |
| F1  | 0.7483(3)  | 0.75        | 0.1509(2)   | 0.0274(4)  |
| F2  | 0.3852(2)  | 0.60751(15) | 0.23790(16) | 0.0352(3)  |
| F3  | 0.8041(2)  | 0.89142(13) | 0.41862(15) | 0.0290(3)  |
| N1  | 0.4368(4)  | 0.75        | 0.5164(3)   | 0.0188(4)  |

**Table S4-7. Bond lengths (Å) for cyclo-C<sub>3</sub>H<sub>5</sub>CN•AsF<sub>5</sub>.**

|        |            |        |            |
|--------|------------|--------|------------|
| C1-N1  | 1.140(4)   | C1-C2  | 1.422(4)   |
| C2-C3  | 1.521(3)   | C2-C3  | 1.521(3)   |
| C2-H2  | 1.0        | C3-C3  | 1.478(4)   |
| C3-H3A | 0.99       | C3-H3B | 0.99       |
| As1-F1 | 1.702(2)   | As1-F2 | 1.7051(15) |
| As1-F2 | 1.7051(15) | As1-F3 | 1.7085(14) |
| As1-F3 | 1.7085(14) | As1-N1 | 1.962(3)   |

**Table S5-7. Bond angles (°) for cyclo-C<sub>3</sub>H<sub>5</sub>CN•AsF<sub>5</sub>.**

|            |            |           |            |
|------------|------------|-----------|------------|
| N1-C1-C2   | 177.7(3)   | C1-C2-C3  | 118.97(19) |
| C1-C2-C3   | 118.98(19) | C3-C2-C3  | 58.15(18)  |
| C1-C2-H2   | 116.1      | C3-C2-H2  | 116.1      |
| C3-C2-H2   | 116.1      | C3-C3-C2  | 60.93(9)   |
| C3-C3-H3A  | 117.7      | C2-C3-H3A | 117.7      |
| C3-C3-H3B  | 117.7      | C2-C3-H3B | 117.7      |
| H3A-C3-H3B | 114.8      | F1-As1-F2 | 92.53(7)   |
| F1-As1-F2  | 92.53(7)   | F2-As1-F2 | 90.26(12)  |
| F1-As1-F3  | 93.09(7)   | F2-As1-F3 | 174.36(6)  |
| F2-As1-F3  | 90.01(9)   | F1-As1-F3 | 93.09(7)   |
| F2-As1-F3  | 90.01(9)   | F2-As1-F3 | 174.36(6)  |
| F3-As1-F3  | 89.17(10)  | F1-As1-N1 | 179.00(8)  |
| F2-As1-N1  | 88.18(8)   | F2-As1-N1 | 88.18(8)   |
| F3-As1-N1  | 86.19(8)   | F3-As1-N1 | 86.19(8)   |
| C1-N1-As1  | 170.6(2)   |           |            |

**Table S6-7. Torsion angles (°) for cyclo-C<sub>3</sub>H<sub>5</sub>CN•AsF<sub>5</sub>.**

|             |             |
|-------------|-------------|
| C1-C2-C3-C3 | -107.93(16) |
|-------------|-------------|

**Table S7-7. Anisotropic atomic displacement parameters (Å<sup>2</sup>) for cyclo-C<sub>3</sub>H<sub>5</sub>CN•AsF<sub>5</sub>.**

The anisotropic atomic displacement factor exponent takes the form:  $-2\pi^2 [ h^2 a^2 U_{11} + \dots + 2 h k a^* b^* U_{12} ]$

|    | <b>U<sub>11</sub></b> | <b>U<sub>22</sub></b> | <b>U<sub>33</sub></b> | <b>U<sub>23</sub></b> | <b>U<sub>13</sub></b> | <b>U<sub>12</sub></b> |
|----|-----------------------|-----------------------|-----------------------|-----------------------|-----------------------|-----------------------|
| C1 | 0.0158(11)            | 0.0164(11)            | 0.0213(14)            | 0                     | 0.0000(10)            | 0                     |
| C2 | 0.0191(11)            | 0.0250(13)            | 0.0161(13)            | 0                     | 0.0018(9)             | 0                     |

|     |             |             |             |            |            |            |
|-----|-------------|-------------|-------------|------------|------------|------------|
| C3  | 0.0288(10)  | 0.0215(9)   | 0.0227(10)  | 0.0013(7)  | 0.0108(8)  | -0.0041(7) |
| As1 | 0.01376(11) | 0.01459(12) | 0.01349(13) | 0          | 0.00143(8) | 0          |
| F1  | 0.0244(8)   | 0.0428(10)  | 0.0165(8)   | 0          | 0.0077(6)  | 0          |
| F2  | 0.0342(6)   | 0.0425(7)   | 0.0288(7)   | -0.0158(6) | 0.0056(5)  | -0.0195(6) |
| F3  | 0.0327(6)   | 0.0292(6)   | 0.0258(7)   | -0.0058(5) | 0.0069(5)  | -0.0155(5) |
| N1  | 0.0167(9)   | 0.0220(11)  | 0.0185(12)  | 0          | 0.0054(8)  | 0          |

**Table S8-7. Hydrogen atomic coordinates and isotropic atomic displacement parameters ( $\text{\AA}^2$ ) for cyclo- $\text{C}_3\text{H}_5\text{CN}\cdot\text{AsF}_5$ .**

|     | <b>x/a</b> | <b>y/b</b> | <b>z/c</b> | <b>U(eq)</b> |
|-----|------------|------------|------------|--------------|
| H2  | 0.4586     | 0.7500     | 0.8984     | 0.024        |
| H3A | -0.0383    | 0.6086     | 0.7341     | 0.028        |
| H3B | 0.0719     | 0.6086     | 0.9376     | 0.028        |

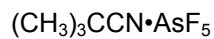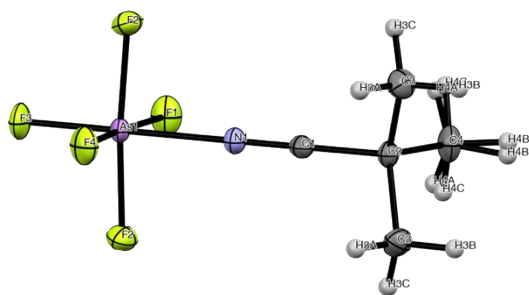

Figure S1-8. Molecular unit of  $(\text{CH}_3)_3\text{CCN}\cdot\text{AsF}_5$ .

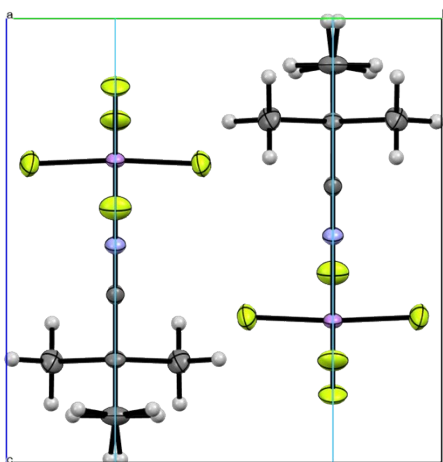

Figure S2-8. Packing of  $(\text{CH}_3)_3\text{CCN}\cdot\text{AsF}_5$  in the unit cell. View along the 010 direction (mirror plane in cyan).

Table S1-8. Sample and crystal data for  $(\text{CH}_3)_3\text{CCN}\cdot\text{AsF}_5$ .

|                        |                                            |                           |
|------------------------|--------------------------------------------|---------------------------|
| Identification code    | TS408                                      |                           |
| Chemical formula       | $\text{C}_5\text{H}_9\text{AsF}_5\text{N}$ |                           |
| Formula weight         | 253.05 g/mol                               |                           |
| Temperature            | 100(2) K                                   |                           |
| Wavelength             | 0.71073 Å                                  |                           |
| Crystal size           | 0.142 x 0.163 x 0.252 mm                   |                           |
| Crystal habit          | clear colorless prism                      |                           |
| Crystal system         | monoclinic                                 |                           |
| Space group            | P 1 21/m 1                                 |                           |
| Unit cell dimensions   | $a = 5.9896(16)$ Å                         | $\alpha = 90^\circ$       |
|                        | $b = 8.660(2)$ Å                           | $\beta = 97.932(4)^\circ$ |
|                        | $c = 8.905(2)$ Å                           | $\gamma = 90^\circ$       |
| Volume                 | $457.5(2)$ Å <sup>3</sup>                  |                           |
| Z                      | 2                                          |                           |
| Density (calculated)   | 1.837 g/cm <sup>3</sup>                    |                           |
| Absorption coefficient | 3.742 mm <sup>-1</sup>                     |                           |
| F(000)                 | 248                                        |                           |

**Table S2-8. Data collection and structure refinement for (CH<sub>3</sub>)<sub>3</sub>CCN•AsF<sub>5</sub>.**

|                                     |                                                                                                                         |                           |
|-------------------------------------|-------------------------------------------------------------------------------------------------------------------------|---------------------------|
| Diffractometer                      | Bruker APEX DUO                                                                                                         |                           |
| Radiation source                    | fine-focus tube, MoK $\alpha$                                                                                           |                           |
| Theta range for data collection     | 2.31 to 30.55°                                                                                                          |                           |
| Index ranges                        | -8<=h<=8, -12<=k<=12, -12<=l<=12                                                                                        |                           |
| Reflections collected               | 9013                                                                                                                    |                           |
| Independent reflections             | 1482 [R(int) = 0.0442]                                                                                                  |                           |
| Coverage of independent reflections | 99.3%                                                                                                                   |                           |
| Absorption correction               | multi-scan                                                                                                              |                           |
| Structure solution technique        | direct methods                                                                                                          |                           |
| Structure solution program          | SHELXTL XT 2014/4 (Bruker AXS, 2014)                                                                                    |                           |
| Refinement method                   | Full-matrix least-squares on F <sup>2</sup>                                                                             |                           |
| Refinement program                  | SHELXTL XL 2014/7 (Bruker AXS, 2014)                                                                                    |                           |
| Function minimized                  | $\Sigma w(F_o^2 - F_c^2)^2$                                                                                             |                           |
| Data / restraints / parameters      | 1482 / 0 / 69                                                                                                           |                           |
| Goodness-of-fit on F <sup>2</sup>   | 1.064                                                                                                                   |                           |
| Final R indices                     | 1366 data; I>2 $\sigma$ (I)                                                                                             | R1 = 0.0184, wR2 = 0.0444 |
|                                     | all data                                                                                                                | R1 = 0.0217, wR2 = 0.0456 |
| Weighting scheme                    | w=1/[ $\sigma^2(F_o^2)+(0.0146P)^2+0.0888P$ ]<br>where P=(F <sub>o</sub> <sup>2</sup> +2F <sub>c</sub> <sup>2</sup> )/3 |                           |
| Largest diff. peak and hole         | 0.343 and -0.334 eÅ <sup>-3</sup>                                                                                       |                           |
| R.M.S. deviation from mean          | 0.068 eÅ <sup>-3</sup>                                                                                                  |                           |

**Table S3-8. Atomic coordinates and equivalent isotropic atomic displacement parameters (Å<sup>2</sup>) for (CH<sub>3</sub>)<sub>3</sub>CCN•AsF<sub>5</sub>.**

U(eq) is defined as one third of the trace of the orthogonalized U<sub>ij</sub> tensor.

|     | x/a         | y/b         | z/c         | U(eq)       |
|-----|-------------|-------------|-------------|-------------|
| C1  | 0.7784(3)   | 0.25        | 0.6220(2)   | 0.0159(3)   |
| C2  | 0.9290(3)   | 0.25        | 0.7673(2)   | 0.0158(3)   |
| C3  | 0.0766(2)   | 0.39603(16) | 0.77271(16) | 0.0232(3)   |
| C4  | 0.7803(3)   | 0.25        | 0.8951(2)   | 0.0240(4)   |
| As1 | 0.45088(3)  | 0.25        | 0.31923(2)  | 0.01420(6)  |
| F1  | 0.23578(19) | 0.25        | 0.42687(13) | 0.0281(3)   |
| F2  | 0.45877(13) | 0.44741(9)  | 0.32748(9)  | 0.02626(19) |
| F3  | 0.2711(2)   | 0.25        | 0.15329(13) | 0.0298(3)   |
| F4  | 0.6846(2)   | 0.25        | 0.22973(13) | 0.0277(3)   |
| N1  | 0.6598(3)   | 0.25        | 0.51047(17) | 0.0173(3)   |

**Table S4-8. Bond lengths (Å) for (CH<sub>3</sub>)<sub>3</sub>CCN•AsF<sub>5</sub>.**

|        |            |        |            |
|--------|------------|--------|------------|
| C1-N1  | 1.139(2)   | C1-C2  | 1.471(2)   |
| C2-C4  | 1.539(2)   | C2-C3  | 1.5398(17) |
| C2-C3  | 1.5398(17) | C3-H3A | 0.98       |
| C3-H3B | 0.98       | C3-H3C | 0.98       |
| C4-H4A | 0.98       | C4-H4B | 0.98       |
| C4-H4C | 0.98       | As1-F4 | 1.7036(12) |
| As1-F3 | 1.7041(11) | As1-F1 | 1.7087(12) |



|        |            |        |           |
|--------|------------|--------|-----------|
| As1-F2 | 1.7115(9)  | As1-F2 | 1.7115(9) |
| As1-N1 | 1.9692(15) |        |           |

**Table S5-8. Bond angles (°) for CH<sub>3</sub>)<sub>3</sub>CCN•AsF<sub>5</sub>.**

|            |            |            |            |
|------------|------------|------------|------------|
| N1-C1-C2   | 179.23(18) | C1-C2-C4   | 107.65(14) |
| C1-C2-C3   | 107.90(10) | C4-C2-C3   | 111.40(10) |
| C1-C2-C3   | 107.90(10) | C4-C2-C3   | 111.40(10) |
| C3-C2-C3   | 110.43(15) | C2-C3-H3A  | 109.5      |
| C2-C3-H3B  | 109.5      | H3A-C3-H3B | 109.5      |
| C2-C3-H3C  | 109.5      | H3A-C3-H3C | 109.5      |
| H3B-C3-H3C | 109.5      | C2-C4-H4A  | 109.5      |
| C2-C4-H4B  | 109.5      | H4A-C4-H4B | 109.5      |
| C2-C4-H4C  | 109.5      | H4A-C4-H4C | 109.5      |
| H4B-C4-H4C | 109.5      | F4-As1-F3  | 93.22(6)   |
| F4-As1-F1  | 173.85(5)  | F3-As1-F1  | 92.94(6)   |
| F4-As1-F2  | 90.03(3)   | F3-As1-F2  | 92.73(3)   |
| F1-As1-F2  | 89.68(3)   | F4-As1-F2  | 90.03(3)   |
| F3-As1-F2  | 92.73(3)   | F1-As1-F2  | 89.68(3)   |
| F2-As1-F2  | 174.53(5)  | F4-As1-N1  | 86.53(6)   |
| F3-As1-N1  | 179.75(6)  | F1-As1-N1  | 87.31(6)   |
| F2-As1-N1  | 87.27(3)   | F2-As1-N1  | 87.27(3)   |
| C1-N1-As1  | 179.17(15) |            |            |

**Table S6-8. Anisotropic atomic displacement parameters (Å<sup>2</sup>) for CH<sub>3</sub>)<sub>3</sub>CCN•AsF<sub>5</sub>.**

The anisotropic atomic displacement factor exponent takes the form:  $-2\pi^2 [ h^2 a'^2 U_{11} + \dots + 2 h k a' b' U_{12} ]$

|     | <b>U<sub>11</sub></b> | <b>U<sub>22</sub></b> | <b>U<sub>33</sub></b> | <b>U<sub>23</sub></b> | <b>U<sub>13</sub></b> | <b>U<sub>12</sub></b> |
|-----|-----------------------|-----------------------|-----------------------|-----------------------|-----------------------|-----------------------|
| C1  | 0.0182(8)             | 0.0128(7)             | 0.0173(8)             | 0                     | 0.0041(6)             | 0                     |
| C2  | 0.0143(7)             | 0.0179(8)             | 0.0140(7)             | 0                     | -0.0021(6)            | 0                     |
| C3  | 0.0209(6)             | 0.0219(6)             | 0.0249(7)             | -0.0008(5)            | -0.0040(5)            | -0.0048(5)            |
| C4  | 0.0223(9)             | 0.0356(11)            | 0.0141(8)             | 0                     | 0.0021(7)             | 0                     |
| As1 | 0.01636(10)           | 0.01489(9)            | 0.01055(9)            | 0                     | -0.00101(6)           | 0                     |
| F1  | 0.0187(5)             | 0.0422(7)             | 0.0240(6)             | 0                     | 0.0051(5)             | 0                     |
| F2  | 0.0324(5)             | 0.0154(4)             | 0.0285(4)             | 0.0020(3)             | -0.0048(4)            | 0.0026(3)             |
| F3  | 0.0335(7)             | 0.0343(7)             | 0.0173(6)             | 0                     | -0.0115(5)            | 0                     |
| F4  | 0.0281(6)             | 0.0382(7)             | 0.0186(6)             | 0                     | 0.0096(5)             | 0                     |
| N1  | 0.0188(7)             | 0.0175(7)             | 0.0145(7)             | 0                     | -0.0017(6)            | 0                     |

**Table S7-8. Hydrogen atomic coordinates and isotropic atomic displacement parameters (Å<sup>2</sup>) for CH<sub>3</sub>)<sub>3</sub>CCN•AsF<sub>5</sub>.**

|     | <b>x/a</b> | <b>y/b</b> | <b>z/c</b> | <b>U(eq)</b> |
|-----|------------|------------|------------|--------------|
| H3A | 1.1626     | 0.3956     | 0.6867     | 0.035        |
| H3B | 1.1809     | 0.3976     | 0.8677     | 0.035        |
| H3C | 0.9802     | 0.4879     | 0.7672     | 0.035        |
| H4A | 0.6729     | 0.3358     | 0.8799     | 0.036        |

|     |        |        |        |       |
|-----|--------|--------|--------|-------|
| H4B | 0.8756 | 0.2620 | 0.9931 | 0.024 |
| H4C | 0.6978 | 0.1522 | 0.8938 | 0.036 |

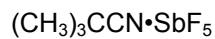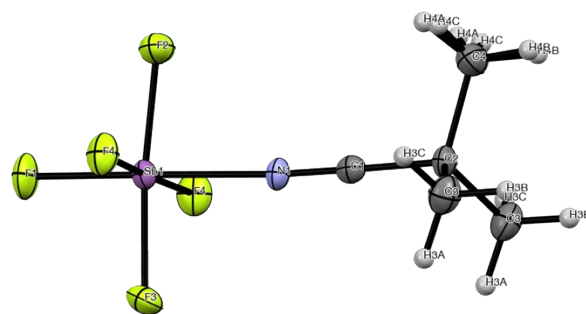

Figure S1-9. Molecular unit of  $(\text{CH}_3)_3\text{CCN}\cdot\text{SbF}_5$ .

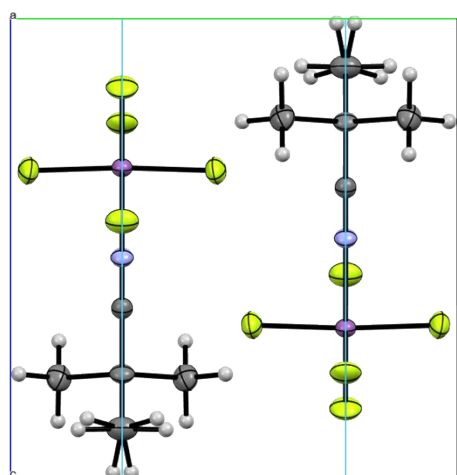

Figure S2-9. Packing of  $(\text{CH}_3)_3\text{CCN}\cdot\text{SbF}_5$  in the unit cell. View along the 010 direction (mirror plane in cyan).

Table S1-9. Sample and crystal data for  $(\text{CH}_3)_3\text{CCN}\cdot\text{SbF}_5$ .

|                        |                                            |                           |
|------------------------|--------------------------------------------|---------------------------|
| Identification code    | TS377                                      |                           |
| Chemical formula       | $\text{C}_5\text{H}_9\text{F}_5\text{NSb}$ |                           |
| Formula weight         | 299.88 g/mol                               |                           |
| Temperature            | 100(2) K                                   |                           |
| Wavelength             | 0.71073 Å                                  |                           |
| Crystal size           | 0.064 x 0.079 x 0.138 mm                   |                           |
| Crystal habit          | clear colorless prism                      |                           |
| Crystal system         | monoclinic                                 |                           |
| Space group            | $P 1 21/m 1$                               |                           |
| Unit cell dimensions   | $a = 5.970(3)$ Å                           | $\alpha = 90^\circ$       |
|                        | $b = 8.897(5)$ Å                           | $\beta = 97.380(8)^\circ$ |
|                        | $c = 9.201(5)$ Å                           | $\gamma = 90^\circ$       |
| Volume                 | $484.7(4)$ Å <sup>3</sup>                  |                           |
| Z                      | 2                                          |                           |
| Density (calculated)   | $2.055$ g/cm <sup>3</sup>                  |                           |
| Absorption coefficient | $2.872$ mm <sup>-1</sup>                   |                           |
| F(000)                 | 284                                        |                           |

**Table S2-9. Data collection and structure refinement for (CH<sub>3</sub>)<sub>3</sub>CCN•SbF<sub>5</sub>.**

|                                     |                                                                                     |                           |
|-------------------------------------|-------------------------------------------------------------------------------------|---------------------------|
| Diffractometer                      | Bruker APEX DUO                                                                     |                           |
| Radiation source                    | fine-focus tube, MoK $\alpha$                                                       |                           |
| Theta range for data collection     | 2.23 to 30.44°                                                                      |                           |
| Reflections collected               | 1532                                                                                |                           |
| Independent reflections             | 1532 [R(int) = 0.0000]                                                              |                           |
| Coverage of independent reflections | 98.3%                                                                               |                           |
| Absorption correction               | multi-scan                                                                          |                           |
| Structure solution technique        | direct methods                                                                      |                           |
| Structure solution program          | SHELXTL XT 2014/4 (Bruker AXS, 2014)                                                |                           |
| Refinement method                   | Full-matrix least-squares on F <sup>2</sup>                                         |                           |
| Refinement program                  | SHELXTL XL 2014/7 (Bruker AXS, 2014)                                                |                           |
| Function minimized                  | $\Sigma w(F_o^2 - F_c^2)^2$                                                         |                           |
| Data / restraints / parameters      | 1532 / 0 / 70                                                                       |                           |
| Goodness-of-fit on F <sup>2</sup>   | 1.067                                                                               |                           |
| Final R indices                     | 1334 data; $I > 2\sigma(I)$                                                         | R1 = 0.0398, wR2 = 0.0715 |
|                                     | all data                                                                            | R1 = 0.0649, wR2 = 0.0826 |
| Weighting scheme                    | $w = 1/[\sigma^2(F_o^2) + (0.0186P)^2 + 2.7268P]$<br>where $P = (F_o^2 + 2F_c^2)/3$ |                           |
| Largest diff. peak and hole         | 1.292 and -2.683 eÅ <sup>-3</sup>                                                   |                           |
| R.M.S. deviation from mean          | 0.256 eÅ <sup>-3</sup>                                                              |                           |

**Table S3-9. Atomic coordinates and equivalent isotropic atomic displacement parameters (Å<sup>2</sup>) for TS377.**

U(eq) is defined as one third of the trace of the orthogonalized U<sub>ij</sub> tensor.

|     | x/a        | y/b       | z/c        | U(eq)       |
|-----|------------|-----------|------------|-------------|
| C1  | 0.7897(12) | 0.25      | 0.6316(7)  | 0.0184(13)  |
| C2  | 0.9324(12) | 0.25      | 0.7744(8)  | 0.0202(14)  |
| C3  | 0.0797(10) | 0.3919(6) | 0.7836(6)  | 0.0273(11)  |
| C4  | 0.7722(14) | 0.25      | 0.8941(8)  | 0.0285(17)  |
| F1  | 0.2530(9)  | 0.25      | 0.1500(5)  | 0.0342(11)  |
| F2  | 0.2159(8)  | 0.25      | 0.4419(4)  | 0.0307(10)  |
| F3  | 0.7060(8)  | 0.25      | 0.2279(4)  | 0.0294(10)  |
| F4  | 0.4569(6)  | 0.4597(3) | 0.3316(3)  | 0.0286(6)   |
| N1  | 0.6755(10) | 0.25      | 0.5210(6)  | 0.0186(12)  |
| Sb1 | 0.45059(9) | 0.25      | 0.32521(5) | 0.01680(12) |

**Table S4-9. Bond lengths (Å) for (CH<sub>3</sub>)<sub>3</sub>CCN•SbF<sub>5</sub>.**

|        |           |        |          |
|--------|-----------|--------|----------|
| C1-N1  | 1.150(8)  | C1-C2  | 1.471(9) |
| C2-C3  | 1.535(7)  | C2-C3  | 1.535(7) |
| C2-C4  | 1.548(10) | C3-H3A | 0.98     |
| C3-H3B | 0.98      | C3-H3C | 0.98     |
| C4-H4A | 0.98      | C4-H4B | 0.98     |
| C4-H4C | 0.98      | F1-Sb1 | 1.871(4) |

|        |          |        |          |
|--------|----------|--------|----------|
| F2-Sb1 | 1.871(5) | F3-Sb1 | 1.865(5) |
| F4-Sb1 | 1.867(3) | N1-Sb1 | 2.104(6) |
| Sb1-F4 | 1.867(3) |        |          |

**Table S5-9. Bond angles (°) for (CH<sub>3</sub>)<sub>3</sub>CCN•SbF<sub>5</sub>.**

|            |            |            |           |
|------------|------------|------------|-----------|
| N1-C1-C2   | 179.1(7)   | C1-C2-C3   | 108.1(4)  |
| C1-C2-C3   | 108.1(4)   | C3-C2-C3   | 110.7(6)  |
| C1-C2-C4   | 107.2(6)   | C3-C2-C4   | 111.3(4)  |
| C3-C2-C4   | 111.3(4)   | C2-C3-H3A  | 109.5     |
| C2-C3-H3B  | 109.5      | H3A-C3-H3B | 109.5     |
| C2-C3-H3C  | 109.5      | H3A-C3-H3C | 109.5     |
| H3B-C3-H3C | 109.5      | C2-C4-H4A  | 109.5     |
| C2-C4-H4B  | 109.5      | H4A-C4-H4B | 109.5     |
| C2-C4-H4C  | 109.5      | H4A-C4-H4C | 109.5     |
| H4B-C4-H4C | 109.5      | C1-N1-Sb1  | 176.7(6)  |
| F3-Sb1-F4  | 90.05(11)  | F3-Sb1-F4  | 90.05(11) |
| F4-Sb1-F4  | 175.96(19) | F3-Sb1-F1  | 92.9(2)   |
| F4-Sb1-F1  | 92.01(9)   | F4-Sb1-F1  | 92.01(9)  |
| F3-Sb1-F2  | 173.8(2)   | F4-Sb1-F2  | 89.73(11) |
| F4-Sb1-F2  | 89.73(11)  | F1-Sb1-F2  | 93.4(2)   |
| F3-Sb1-N1  | 86.6(2)    | F4-Sb1-N1  | 87.99(9)  |
| F4-Sb1-N1  | 87.99(9)   | F1-Sb1-N1  | 179.4(3)  |
| F2-Sb1-N1  | 87.2(2)    |            |           |

**Table S6-9. Anisotropic atomic displacement parameters (Å<sup>2</sup>) for (CH<sub>3</sub>)<sub>3</sub>CCN•SbF<sub>5</sub>.**

The anisotropic atomic displacement factor exponent takes the form:  $-2\pi^2 [ h^2 a'^2 U_{11} + \dots + 2 h k a' b' U_{12} ]$

|     | <b>U<sub>11</sub></b> | <b>U<sub>22</sub></b> | <b>U<sub>33</sub></b> | <b>U<sub>23</sub></b> | <b>U<sub>13</sub></b> | <b>U<sub>12</sub></b> |
|-----|-----------------------|-----------------------|-----------------------|-----------------------|-----------------------|-----------------------|
| C1  | 0.018(3)              | 0.018(3)              | 0.020(3)              | 0                     | 0.004(3)              | 0                     |
| C2  | 0.018(3)              | 0.026(4)              | 0.016(3)              | 0                     | -0.003(3)             | 0                     |
| C3  | 0.024(3)              | 0.026(2)              | 0.031(2)              | 0.000(2)              | -0.003(2)             | -0.004(2)             |
| C4  | 0.024(4)              | 0.040(5)              | 0.022(3)              | 0                     | 0.003(3)              | 0                     |
| F1  | 0.033(3)              | 0.042(3)              | 0.023(2)              | 0                     | -0.013(2)             | 0                     |
| F2  | 0.022(2)              | 0.045(3)              | 0.026(2)              | 0                     | 0.006(2)              | 0                     |
| F3  | 0.030(3)              | 0.040(3)              | 0.021(2)              | 0                     | 0.0113(19)            | 0                     |
| F4  | 0.0357(15)            | 0.0173(12)            | 0.0311(14)            | 0.0015(12)            | -0.0027(16)           | 0.0031(15)            |
| N1  | 0.018(3)              | 0.021(3)              | 0.016(3)              | 0                     | -0.003(2)             | 0                     |
| Sb1 | 0.0186(2)             | 0.01707(19)           | 0.01429(18)           | 0                     | 0.00030(18)           | 0                     |

**Table S7-9. Hydrogen atomic coordinates and isotropic atomic displacement parameters (Å<sup>2</sup>) for (CH<sub>3</sub>)<sub>3</sub>CCN•SbF<sub>5</sub>.**

|     | <b>x/a</b> | <b>y/b</b> | <b>z/c</b> | <b>U(eq)</b> |
|-----|------------|------------|------------|--------------|
| H3A | 1.1734     | 0.3914     | 0.7036     | 0.041        |
| H3B | 1.1771     | 0.3937     | 0.8778     | 0.041        |
| H3C | 0.9827     | 0.4811     | 0.7753     | 0.041        |
| H4A | 0.6573     | 0.3282     | 0.8721     | 0.043        |

|     |        |        |        |       |
|-----|--------|--------|--------|-------|
| H4B | 0.8595 | 0.2701 | 0.9897 | 0.043 |
| H4C | 0.6986 | 0.1517 | 0.8961 | 0.043 |

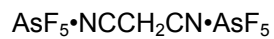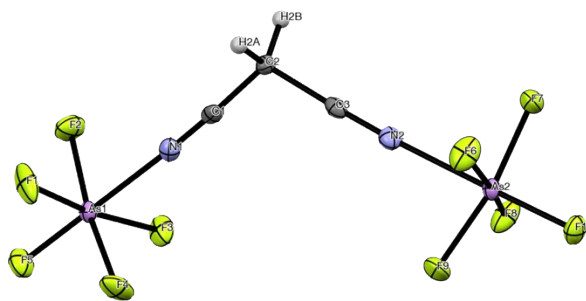

Figure S1-10. Asymmetric unit of  $\text{AsF}_5 \cdot \text{NCCH}_2\text{CN} \cdot \text{AsF}_5$ .

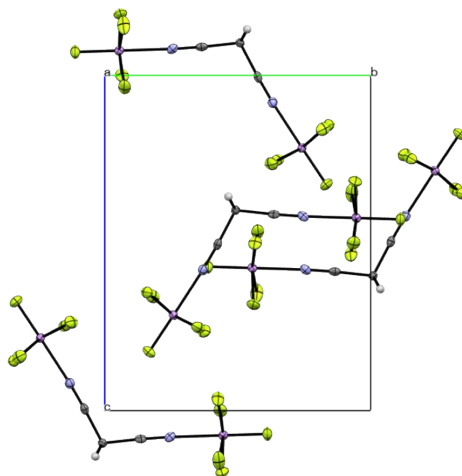

Figure S2-10. Packing of  $\text{AsF}_5 \cdot \text{NCCH}_2\text{CN} \cdot \text{AsF}_5$  in the unit cell. View along the 010 direction.

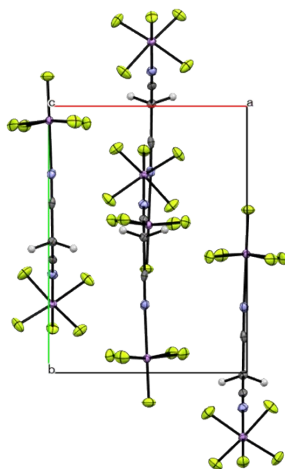

Figure S3-10. Packing of  $\text{AsF}_5 \cdot \text{NCCH}_2\text{CN} \cdot \text{AsF}_5$  in the unit cell. View along the 001 direction.

**Table S1-10. Sample and crystal data for AsF<sub>5</sub>•NCCH<sub>2</sub>CN•AsF<sub>5</sub>.**

|                        |                                                                              |         |
|------------------------|------------------------------------------------------------------------------|---------|
| Identification code    | MalononitrileAsF5                                                            |         |
| Chemical formula       | C <sub>3</sub> H <sub>2</sub> As <sub>2</sub> F <sub>10</sub> N <sub>2</sub> |         |
| Formula weight         | 405.91 g/mol                                                                 |         |
| Temperature            | 100(2) K                                                                     |         |
| Wavelength             | 0.71073 Å                                                                    |         |
| Crystal size           | 0.050 x 0.050 x 0.180 mm                                                     |         |
| Crystal habit          | clear colorless rod                                                          |         |
| Crystal system         | orthorhombic                                                                 |         |
| Space group            | P 21 21 21                                                                   |         |
| Unit cell dimensions   | a = 7.5930(13) Å                                                             | α = 90° |
|                        | b = 10.1881(18) Å                                                            | β = 90° |
|                        | c = 12.803(2) Å                                                              | γ = 90° |
| Volume                 | 990.4(3) Å <sup>3</sup>                                                      |         |
| Z                      | 4                                                                            |         |
| Density (calculated)   | 2.722 g/cm <sup>3</sup>                                                      |         |
| Absorption coefficient | 6.878 mm <sup>-1</sup>                                                       |         |
| F(000)                 | 760                                                                          |         |

**Table S2-10. Data collection and structure refinement for AsF<sub>5</sub>•NCCH<sub>2</sub>CN•AsF<sub>5</sub>.**

|                                     |                                                                                                                                                                       |                           |
|-------------------------------------|-----------------------------------------------------------------------------------------------------------------------------------------------------------------------|---------------------------|
| Diffractometer                      | Bruker APEX DUO                                                                                                                                                       |                           |
| Radiation source                    | fine-focus tube, MoKα                                                                                                                                                 |                           |
| Theta range for data collection     | 2.56 to 30.47°                                                                                                                                                        |                           |
| Index ranges                        | -10 ≤ h ≤ 10, -14 ≤ k ≤ 14, -18 ≤ l ≤ 18                                                                                                                              |                           |
| Reflections collected               | 24363                                                                                                                                                                 |                           |
| Independent reflections             | 3002 [R(int) = 0.0457]                                                                                                                                                |                           |
| Coverage of independent reflections | 99.9%                                                                                                                                                                 |                           |
| Absorption correction               | multi-scan                                                                                                                                                            |                           |
| Max. and min. transmission          | 0.7250 and 0.3710                                                                                                                                                     |                           |
| Structure solution technique        | direct methods                                                                                                                                                        |                           |
| Structure solution program          | SHELXTL XT 2013/1 (Bruker AXS, 2014)                                                                                                                                  |                           |
| Refinement method                   | Full-matrix least-squares on F <sup>2</sup>                                                                                                                           |                           |
| Refinement program                  | SHELXTL XL 2014/7 (Bruker AXS, 2014)                                                                                                                                  |                           |
| Function minimized                  | Σ w(F <sub>o</sub> <sup>2</sup> - F <sub>c</sub> <sup>2</sup> ) <sup>2</sup>                                                                                          |                           |
| Data / restraints / parameters      | 3002 / 0 / 154                                                                                                                                                        |                           |
| Goodness-of-fit on F <sup>2</sup>   | 1.055                                                                                                                                                                 |                           |
| Δ/σ <sub>max</sub>                  | 0.001                                                                                                                                                                 |                           |
| Final R indices                     | 2758 data; I > 2σ(I)                                                                                                                                                  | R1 = 0.0207, wR2 = 0.0375 |
|                                     | all data                                                                                                                                                              | R1 = 0.0258, wR2 = 0.0387 |
| Weighting scheme                    | w = 1/[σ <sup>2</sup> (F <sub>o</sub> <sup>2</sup> ) + (0.0121P) <sup>2</sup> + 0.4306P]<br>where P = (F <sub>o</sub> <sup>2</sup> + 2F <sub>c</sub> <sup>2</sup> )/3 |                           |
| Absolute structure parameter        | 0.5(0)                                                                                                                                                                |                           |
| Largest diff. peak and hole         | 0.341 and -0.374 eÅ <sup>-3</sup>                                                                                                                                     |                           |
| R.M.S. deviation from mean          | 0.081 eÅ <sup>-3</sup>                                                                                                                                                |                           |



**Table S3-10. Atomic coordinates and equivalent isotropic atomic displacement param. ( $\text{\AA}^2$ ) for  $\text{AsF}_5 \cdot \text{NCCH}_2\text{CN} \cdot \text{AsF}_5$ .**U(eq) is defined as one third of the trace of the orthogonalized  $U_{ij}$  tensor.

|     | x/a        | y/b         | z/c         | U(eq)      |
|-----|------------|-------------|-------------|------------|
| As1 | 0.49615(5) | 0.94566(3)  | 0.42531(2)  | 0.01171(7) |
| As2 | 0.48030(4) | 0.25857(3)  | 0.71591(2)  | 0.01241(7) |
| C1  | 0.4832(5)  | 0.6355(3)   | 0.4144(2)   | 0.0133(5)  |
| C2  | 0.4807(5)  | 0.4917(3)   | 0.4019(2)   | 0.0123(6)  |
| C3  | 0.4797(4)  | 0.4244(3)   | 0.5041(2)   | 0.0141(6)  |
| F1  | 0.6789(3)  | 0.9286(2)   | 0.3500(2)   | 0.0325(6)  |
| F2  | 0.3704(3)  | 0.9412(3)   | 0.31597(15) | 0.0267(5)  |
| F3  | 0.3103(3)  | 0.9348(2)   | 0.49952(16) | 0.0232(5)  |
| F4  | 0.6214(3)  | 0.9253(2)   | 0.53379(17) | 0.0279(5)  |
| F5  | 0.5057(3)  | 0.11110(16) | 0.42942(14) | 0.0237(4)  |
| F6  | 0.6547(3)  | 0.1798(2)   | 0.65968(19) | 0.0263(6)  |
| F7  | 0.3415(3)  | 0.1589(2)   | 0.64771(18) | 0.0234(5)  |
| F8  | 0.3045(3)  | 0.3509(2)   | 0.75242(15) | 0.0253(5)  |
| F9  | 0.6199(3)  | 0.3736(2)   | 0.76351(17) | 0.0279(5)  |
| F10 | 0.4802(3)  | 0.16684(17) | 0.82540(13) | 0.0214(4)  |
| N1  | 0.4852(3)  | 0.7455(2)   | 0.42028(17) | 0.0149(4)  |
| N2  | 0.4795(4)  | 0.3691(2)   | 0.58044(19) | 0.0166(5)  |

**Table S4-10. Bond lengths ( $\text{\AA}$ ) for  $\text{AsF}_5 \cdot \text{NCCH}_2\text{CN} \cdot \text{AsF}_5$ .**

|         |            |        |          |
|---------|------------|--------|----------|
| As1-F5  | 1.6879(17) | As1-F2 | 1.695(2) |
| As1-F4  | 1.696(2)   | As1-F1 | 1.698(2) |
| As1-F3  | 1.7049(19) | As1-N1 | 2.042(3) |
| As2-F10 | 1.6848(17) | As2-F9 | 1.694(2) |
| As2-F8  | 1.698(2)   | As2-F7 | 1.704(2) |
| As2-F6  | 1.707(2)   | As2-N2 | 2.068(3) |
| C1-N1   | 1.123(4)   | C1-C2  | 1.474(4) |
| C2-C3   | 1.476(4)   | C2-H2A | 0.99     |
| C2-H2B  | 0.99       | C3-N2  | 1.129(4) |

**Table S5-10. Bond angles ( $^\circ$ ) for  $\text{AsF}_5 \cdot \text{NCCH}_2\text{CN} \cdot \text{AsF}_5$ .**

|            |            |            |            |
|------------|------------|------------|------------|
| F5-As1-F2  | 94.41(11)  | F5-As1-F4  | 94.17(11)  |
| F2-As1-F4  | 171.42(13) | F5-As1-F1  | 94.87(12)  |
| F2-As1-F1  | 89.34(12)  | F4-As1-F1  | 89.68(12)  |
| F5-As1-F3  | 94.76(12)  | F2-As1-F3  | 89.56(11)  |
| F4-As1-F3  | 89.98(12)  | F1-As1-F3  | 170.37(13) |
| F5-As1-N1  | 179.86(11) | F2-As1-N1  | 85.65(11)  |
| F4-As1-N1  | 85.77(10)  | F1-As1-N1  | 85.01(11)  |
| F3-As1-N1  | 85.36(10)  | F10-As2-F9 | 94.86(10)  |
| F10-As2-F8 | 94.46(10)  | F9-As2-F8  | 90.54(12)  |

|            |           |            |            |
|------------|-----------|------------|------------|
| F10-As2-F7 | 95.47(11) | F9-As2-F7  | 169.65(11) |
| F8-As2-F7  | 89.16(11) | F10-As2-F6 | 95.20(11)  |
| F9-As2-F6  | 89.51(12) | F8-As2-F6  | 170.30(10) |
| F7-As2-F6  | 89.05(10) | F10-As2-N2 | 179.28(9)  |
| F9-As2-N2  | 85.80(11) | F8-As2-N2  | 85.82(10)  |
| F7-As2-N2  | 83.86(11) | F6-As2-N2  | 84.51(11)  |
| N1-C1-C2   | 177.7(3)  | C1-C2-C3   | 111.5(2)   |
| C1-C2-H2A  | 109.3     | C3-C2-H2A  | 109.3      |
| C1-C2-H2B  | 109.3     | C3-C2-H2B  | 109.3      |
| H2A-C2-H2B | 108.0     | N2-C3-C2   | 177.7(3)   |
| C1-N1-As1  | 177.4(2)  | C3-N2-As2  | 177.0(2)   |

1

**Table S6-10. Anisotropic atomic displacement parameters ( $\text{\AA}^2$ ) for  $\text{AsF}_5 \cdot \text{NCCH}_2\text{CN} \cdot \text{AsF}_5$ .**The anisotropic atomic displacement factor exponent takes the form:  $-2\pi^2 [ h^2 a'^2 U_{11} + \dots + 2 h k a' b' U_{12} ]$ 

|     | $U_{11}$    | $U_{22}$    | $U_{33}$    | $U_{23}$    | $U_{13}$    | $U_{12}$     |
|-----|-------------|-------------|-------------|-------------|-------------|--------------|
| As1 | 0.00930(13) | 0.01259(12) | 0.01323(12) | 0.00086(11) | 0.00137(15) | -0.00001(16) |
| As2 | 0.01244(13) | 0.01140(13) | 0.01339(13) | 0.00153(11) | 0.00062(13) | 0.00070(14)  |
| C1  | 0.0078(14)  | 0.0216(14)  | 0.0105(12)  | 0.0008(11)  | -0.0017(13) | -0.0019(14)  |
| C2  | 0.0130(15)  | 0.0125(12)  | 0.0113(12)  | -0.0004(10) | 0.0002(12)  | 0.0006(13)   |
| C3  | 0.0123(14)  | 0.0111(12)  | 0.0191(14)  | -0.0036(11) | 0.0017(13)  | 0.0001(13)   |
| F1  | 0.0221(11)  | 0.0227(12)  | 0.0526(15)  | -0.0023(12) | 0.0246(11)  | -0.0041(10)  |
| F2  | 0.0361(12)  | 0.0259(12)  | 0.0180(11)  | 0.0031(10)  | -0.0094(9)  | 0.0022(11)   |
| F3  | 0.0167(10)  | 0.0260(12)  | 0.0268(11)  | -0.0020(10) | 0.0118(8)   | -0.0002(9)   |
| F4  | 0.0286(11)  | 0.0224(12)  | 0.0325(13)  | -0.0006(10) | -0.0189(10) | -0.0019(10)  |
| F5  | 0.0295(10)  | 0.0130(8)   | 0.0288(10)  | -0.0003(7)  | 0.0044(13)  | -0.0001(10)  |
| F6  | 0.0217(11)  | 0.0309(14)  | 0.0264(13)  | 0.0047(11)  | 0.0059(10)  | 0.0142(10)   |
| F7  | 0.0286(12)  | 0.0223(12)  | 0.0193(11)  | 0.0006(10)  | -0.0022(9)  | -0.0107(9)   |
| F8  | 0.0279(12)  | 0.0280(13)  | 0.0199(12)  | 0.0052(10)  | 0.0080(9)   | 0.0142(10)   |
| F9  | 0.0325(13)  | 0.0277(13)  | 0.0235(12)  | -0.0021(10) | -0.0040(10) | -0.0158(10)  |
| F10 | 0.0231(11)  | 0.0223(9)   | 0.0190(9)   | 0.0084(7)   | -0.0015(9)  | 0.0007(10)   |
| N1  | 0.0116(10)  | 0.0171(11)  | 0.0159(11)  | 0.0038(11)  | -0.0016(11) | -0.0009(14)  |
| N2  | 0.0176(14)  | 0.0140(11)  | 0.0181(12)  | -0.0018(10) | 0.0021(13)  | 0.0008(11)   |

**Table S7-10. Hydrogen atomic coordinates and isotropic atomic displacement param. ( $\text{\AA}^2$ ) for  $\text{AsF}_5 \cdot \text{NCCH}_2\text{CN} \cdot \text{AsF}_5$ .**

|     | x/a    | y/b    | z/c    | U(eq) |
|-----|--------|--------|--------|-------|
| H2A | 0.5857 | 0.4638 | 0.3618 | 0.015 |
| H2B | 0.3747 | 0.4658 | 0.3619 | 0.015 |

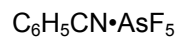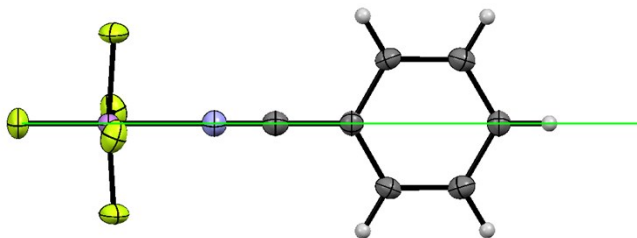

Figure S1-11. Molecular unit of  $\text{C}_6\text{H}_5\text{CN}\cdot\text{AsF}_5$ . (2-fold rotation axis in green)

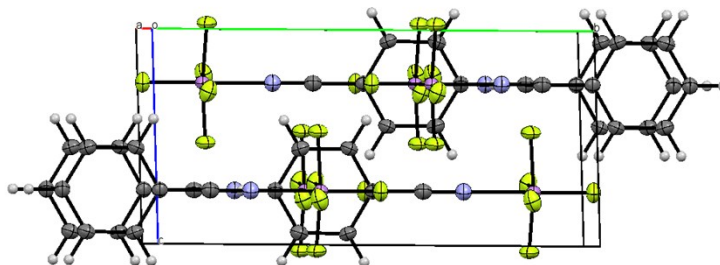

Figure S2-11. Packing of  $\text{C}_6\text{H}_5\text{CN}\cdot\text{AsF}_5$  in the unit cell. View along the 010 direction.

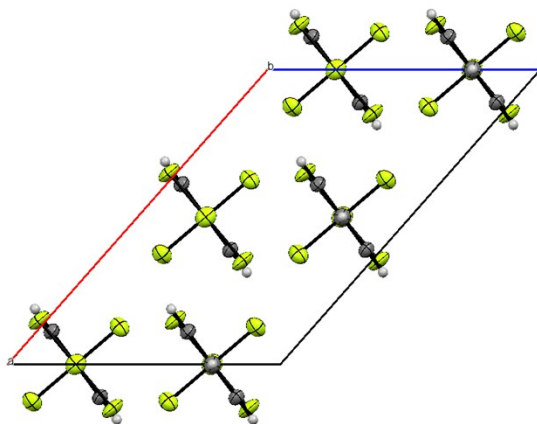

Figure S3-11. Packing of  $\text{C}_6\text{H}_5\text{CN}\cdot\text{AsF}_5$  in the unit cell. View along the 100 direction.

**Table S1-11. Sample and crystal data for C<sub>6</sub>H<sub>5</sub>CN•AsF<sub>5</sub>.**

|                        |                                                  |                 |
|------------------------|--------------------------------------------------|-----------------|
| Identification code    | PhCNAsF <sub>5</sub>                             |                 |
| Chemical formula       | C <sub>7</sub> H <sub>5</sub> AsF <sub>5</sub> N |                 |
| Formula weight         | 273.04 g/mol                                     |                 |
| Temperature            | 100(2) K                                         |                 |
| Wavelength             | 0.71073 Å                                        |                 |
| Crystal size           | 0.120 x 0.160 x 0.190 mm                         |                 |
| Crystal habit          | clear colorless prism                            |                 |
| Crystal system         | monoclinic                                       |                 |
| Space group            | C 1 2/c 1                                        |                 |
| Unit cell dimensions   | a = 11.705(5) Å                                  | α = 90°         |
|                        | b = 12.542(6) Å                                  | β = 131.518(7)° |
|                        | c = 8.136(4) Å                                   | γ = 90°         |
| Volume                 | 894.3(7) Å <sup>3</sup>                          |                 |
| Z                      | 4                                                |                 |
| Density (calculated)   | 2.028 g/cm <sup>3</sup>                          |                 |
| Absorption coefficient | 3.838 mm <sup>-1</sup>                           |                 |
| F(000)                 | 528                                              |                 |

**Table S2-11. Data collection and structure refinement for C<sub>6</sub>H<sub>5</sub>CN•AsF<sub>5</sub>.**

|                                     |                                                                                                                                                               |                           |
|-------------------------------------|---------------------------------------------------------------------------------------------------------------------------------------------------------------|---------------------------|
| Diffractometer                      | Bruker APEX DUO                                                                                                                                               |                           |
| Radiation source                    | fine-focus tube, MoKα                                                                                                                                         |                           |
| Theta range for data collection     | 2.83 to 28.27°                                                                                                                                                |                           |
| Index ranges                        | -15<=h<=15, -16<=k<=16, -10<=l<=10                                                                                                                            |                           |
| Reflections collected               | 9247                                                                                                                                                          |                           |
| Independent reflections             | 1120 [R(int) = 0.0598]                                                                                                                                        |                           |
| Coverage of independent reflections | 100.0%                                                                                                                                                        |                           |
| Absorption correction               | multi-scan                                                                                                                                                    |                           |
| Structure solution technique        | direct methods                                                                                                                                                |                           |
| Structure solution program          | SHELXTL XT 2014/5 (Bruker AXS, 2014)                                                                                                                          |                           |
| Refinement method                   | Full-matrix least-squares on F <sup>2</sup>                                                                                                                   |                           |
| Refinement program                  | SHELXTL XL 2014/7 (Bruker AXS, 2014)                                                                                                                          |                           |
| Function minimized                  | Σ w(F <sub>o</sub> <sup>2</sup> - F <sub>c</sub> <sup>2</sup> ) <sup>2</sup>                                                                                  |                           |
| Data / restraints / parameters      | 1120 / 0 / 67                                                                                                                                                 |                           |
| Goodness-of-fit on F <sup>2</sup>   | 1.072                                                                                                                                                         |                           |
| Final R indices                     | 1025 data; I>2σ(I)                                                                                                                                            | R1 = 0.0341, wR2 = 0.0877 |
|                                     | all data                                                                                                                                                      | R1 = 0.0378, wR2 = 0.0914 |
| Weighting scheme                    | w=1/[σ <sup>2</sup> (F <sub>o</sub> <sup>2</sup> )+(0.0641P) <sup>2</sup> +0.2125P]<br>where P=(F <sub>o</sub> <sup>2</sup> +2F <sub>c</sub> <sup>2</sup> )/3 |                           |
| Largest diff. peak and hole         | 2.122 and -1.174 eÅ <sup>-3</sup>                                                                                                                             |                           |
| R.M.S. deviation from mean          | 0.132 eÅ <sup>-3</sup>                                                                                                                                        |                           |

**Table S3-11. Atomic coordinates and equivalent isotropic atomic displacement parameters (Å<sup>2</sup>) for C<sub>6</sub>H<sub>5</sub>CN•AsF<sub>5</sub>.**

U(eq) is defined as one third of the trace of the orthogonalized U<sub>ij</sub> tensor.

| x/a | y/b | z/c | U(eq) |
|-----|-----|-----|-------|
|-----|-----|-----|-------|

|     |           |             |           |             |
|-----|-----------|-------------|-----------|-------------|
| C1  | 0.5       | 0.3788(3)   | 0.25      | 0.0242(7)   |
| C2  | 0.5       | 0.4929(3)   | 0.25      | 0.0217(7)   |
| C3  | 0.6129(3) | 0.5478(2)   | 0.4477(4) | 0.0223(5)   |
| C4  | 0.6116(3) | 0.6578(2)   | 0.4455(4) | 0.0245(5)   |
| C5  | 0.5       | 0.7135(3)   | 0.25      | 0.0238(7)   |
| N1  | 0.5       | 0.2872(2)   | 0.25      | 0.0253(6)   |
| F1  | 0.5       | 0.99316(17) | 0.25      | 0.0315(5)   |
| F2  | 0.3734(2) | 0.13645(11) | 0.2897(3) | 0.0321(4)   |
| F3  | 0.6493(2) | 0.13690(12) | 0.5273(3) | 0.0344(4)   |
| As1 | 0.5       | 0.12879(2)  | 0.25      | 0.02006(16) |

**Table S4-11. Bond lengths (Å) for C<sub>6</sub>H<sub>5</sub>CN•AsF<sub>5</sub>.**

|        |            |        |            |
|--------|------------|--------|------------|
| C1-N1  | 1.148(4)   | C1-C2  | 1.432(5)   |
| C2-C3  | 1.410(3)   | C2-C3  | 1.410(3)   |
| C3-C4  | 1.380(4)   | C3-H3  | 0.95       |
| C4-C5  | 1.404(3)   | C4-H4  | 0.95       |
| C5-C4  | 1.404(3)   | C5-H5  | 0.95       |
| N1-As1 | 1.987(3)   | F1-As1 | 1.701(2)   |
| F2-As1 | 1.7157(19) | F3-As1 | 1.7108(19) |
| As1-F3 | 1.7107(19) | As1-F2 | 1.7157(19) |

**Table S5-11. Bond angles (°) for C<sub>6</sub>H<sub>5</sub>CN•AsF<sub>5</sub>.**

|           |            |           |            |
|-----------|------------|-----------|------------|
| N1-C1-C2  | 180.0      | C3-C2-C3  | 121.6(3)   |
| C3-C2-C1  | 119.19(16) | C3-C2-C1  | 119.19(16) |
| C4-C3-C2  | 118.6(2)   | C4-C3-H3  | 120.7      |
| C2-C3-H3  | 120.7      | C3-C4-C5  | 120.4(2)   |
| C3-C4-H4  | 119.8      | C5-C4-H4  | 119.8      |
| C4-C5-C4  | 120.3(3)   | C4-C5-H5  | 119.9      |
| C4-C5-H5  | 119.9      | C1-N1-As1 | 180.0      |
| F1-As1-F3 | 93.41(5)   | F1-As1-F3 | 93.41(5)   |
| F3-As1-F3 | 173.18(10) | F1-As1-F2 | 93.21(5)   |
| F3-As1-F2 | 90.18(10)  | F3-As1-F2 | 89.43(10)  |
| F1-As1-F2 | 93.21(5)   | F3-As1-F2 | 89.43(10)  |
| F3-As1-F2 | 90.18(10)  | F2-As1-F2 | 173.58(10) |
| F1-As1-N1 | 180.0      | F3-As1-N1 | 86.59(5)   |
| F3-As1-N1 | 86.59(5)   | F2-As1-N1 | 86.79(5)   |
| F2-As1-N1 | 86.79(5)   |           |            |

**Table S6-11. Torsion angles (°) for C<sub>6</sub>H<sub>5</sub>CN•AsF<sub>5</sub>.**

|             |          |             |            |
|-------------|----------|-------------|------------|
| C3-C2-C3-C4 | 0.00(15) | C1-C2-C3-C4 | 180.00(15) |
| C2-C3-C4-C5 | 0.0(3)   | C3-C4-C5-C4 | 0.00(16)   |

**Table S7-11. Anisotropic atomic displacement parameters (Å<sup>2</sup>) for C<sub>6</sub>H<sub>5</sub>CN•AsF<sub>5</sub>.**

The anisotropic atomic displacement factor exponent takes the form:  $-2\pi^2 [ h^2 a^2 U_{11} + \dots + 2 h k a^* b^* U_{12} ]$

U<sub>11</sub>      U<sub>22</sub>      U<sub>33</sub>      U<sub>23</sub>      U<sub>13</sub>      U<sub>12</sub>

|     |            |            |            |             |             |            |
|-----|------------|------------|------------|-------------|-------------|------------|
| C1  | 0.0253(17) | 0.0254(18) | 0.0219(17) | 0           | 0.0155(15)  | 0          |
| C2  | 0.0262(17) | 0.0204(16) | 0.0222(16) | 0           | 0.0176(14)  | 0          |
| C3  | 0.0218(11) | 0.0251(11) | 0.0168(11) | 0.0036(9)   | 0.0114(9)   | 0.0026(9)  |
| C4  | 0.0237(11) | 0.0278(12) | 0.0194(11) | -0.0028(10) | 0.0132(10)  | 0.0024(10) |
| C5  | 0.0274(18) | 0.0196(16) | 0.0242(18) | 0           | 0.0171(16)  | 0          |
| N1  | 0.0262(16) | 0.0218(15) | 0.0248(16) | 0           | 0.0156(14)  | 0          |
| F1  | 0.0380(12) | 0.0167(10) | 0.0341(12) | 0           | 0.0215(10)  | 0          |
| F2  | 0.0353(9)  | 0.0269(8)  | 0.0410(11) | -0.0060(6)  | 0.0282(9)   | -0.0056(6) |
| F3  | 0.0311(9)  | 0.0334(10) | 0.0154(8)  | 0.0011(6)   | 0.0055(7)   | -0.0031(6) |
| As1 | 0.0204(2)  | 0.0170(2)  | 0.0146(2)  | 0           | 0.00810(17) | 0          |

**Table S8-11. Hydrogen atomic coordinates and isotropic atomic displacement parameters ( $\text{\AA}^2$ ) for  $\text{C}_6\text{H}_5\text{CN}\cdot\text{AsF}_5$ .**

|    | x/a    | y/b    | z/c    | U(eq) |
|----|--------|--------|--------|-------|
| H3 | 0.6882 | 0.5097 | 0.5797 | 0.027 |
| H4 | 0.6868 | 0.6960 | 0.5772 | 0.029 |
| H5 | 0.5000 | 0.7892 | 0.2500 | 0.029 |

## References

1. K. O. Christe, R. D. Wilson, C. J. Schack, and D. D. Desmarreau, in *Inorg. Synth.*, John Wiley & Sons, Inc., New York, 1986, pp. 3-6.
2. H. P. A. Mercier, J. C. P. Sanders, G. J. Schrobilgen and S. S. Tsai, *Inorganic Chemistry*, 1993, **32**, 386-393.
3. O. Ruff and H. Graf, *Berichte der deutschen chemischen Gesellschaft*, 1906, **39**, 67-71.
4. H. Moissan, *La fluor et ses composés*, G. Steinheil, Paris,, 1900.
5. *SAINT+ Vol. 8.27B*, Bruker AXS, Madison, WI, 2011.
6. *SADABS Vol. 2012-1*, Bruker AXS, Madison, WI, 2012.
7. G. M. Sheldrick, *Acta Crystallographica Section A*, 2008, **64**, 112-122.
8. G. M. Sheldrick, *Acta Crystallographica Section C-Structural Chemistry*, 2015, **71**, 3-8.
9. C. B. Hubschle, G. M. Sheldrick and B. Dittrich, *J. Appl. Crystallogr.*, 2011, **44**, 1281-1284.
10. *SHELXT*, G. M. Sheldrick, 2012.
11. *SHELXTL 2014/7*, Bruker AXS, Madison, WI, 2014.
12. *Mercury CSD*, CCDC, 2017.
